# Supplementary material for: Regioselective Heck reaction of aliphatic olefins and aryl halides
Source: Royal Society of Chemistry journal article supplement (doi:10.1039/c3cc45911j), 2013-01-01

**Regioselective Heck Reaction of Aliphatic Olefins and Aryl Halides**

Liena Qin, Hajime Hirao and Jianrong (Steve) Zhou\*

*Division of Chemistry and Biological Chemistry, School of Physical and Mathematical Sciences, Nanyang Technological University,*

*21 Nanyang Link, Singapore 637371*

*E-mail: jrzhou@ntu.edu.sg*

Supporting Information: NMR spectra

ln7036 H CDC13 BBFO1 2013-05-04

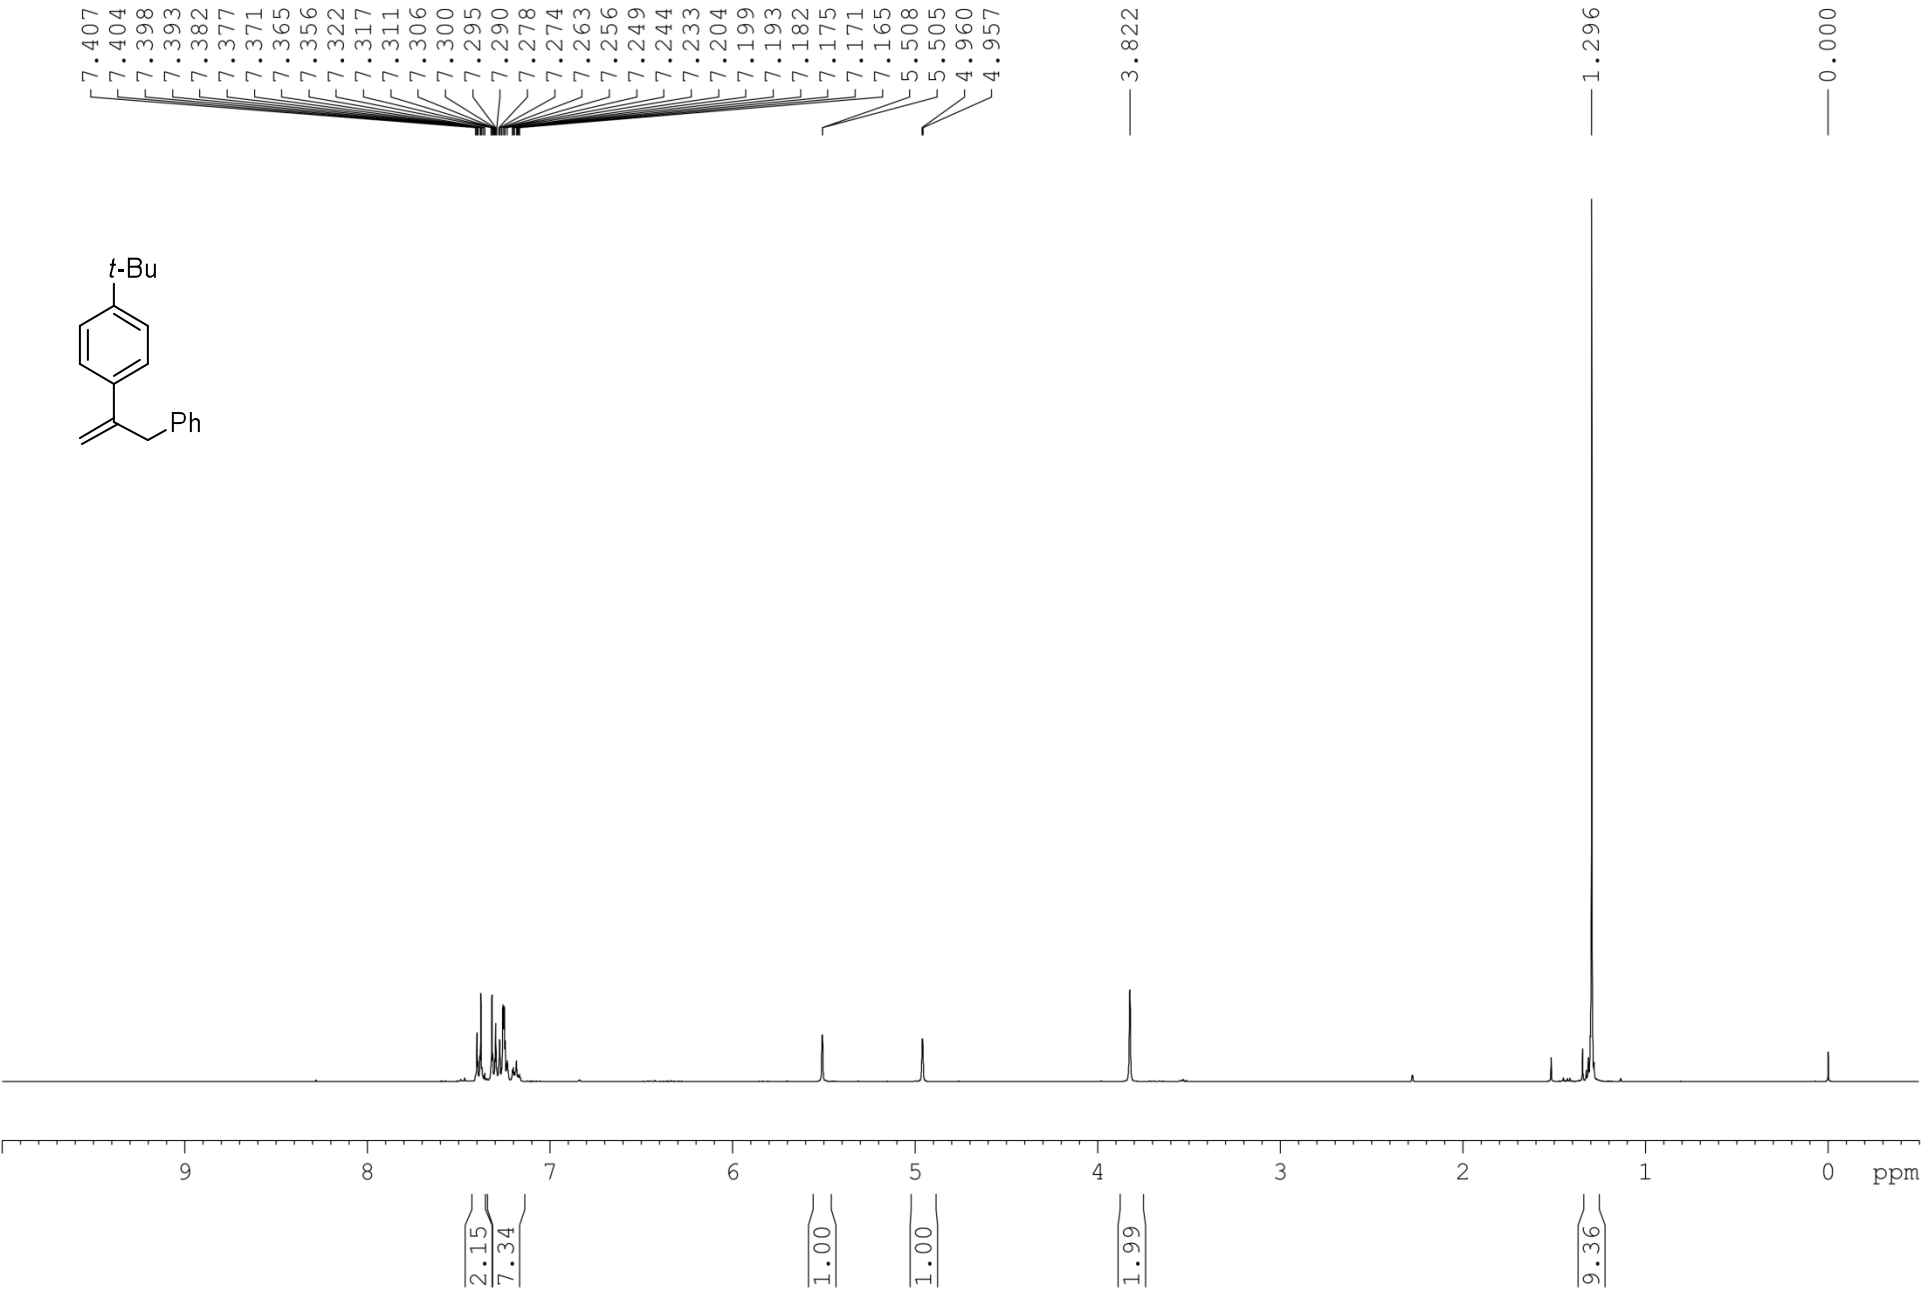

ln6127-4 H CDC13 BBFO1 2013-3-31

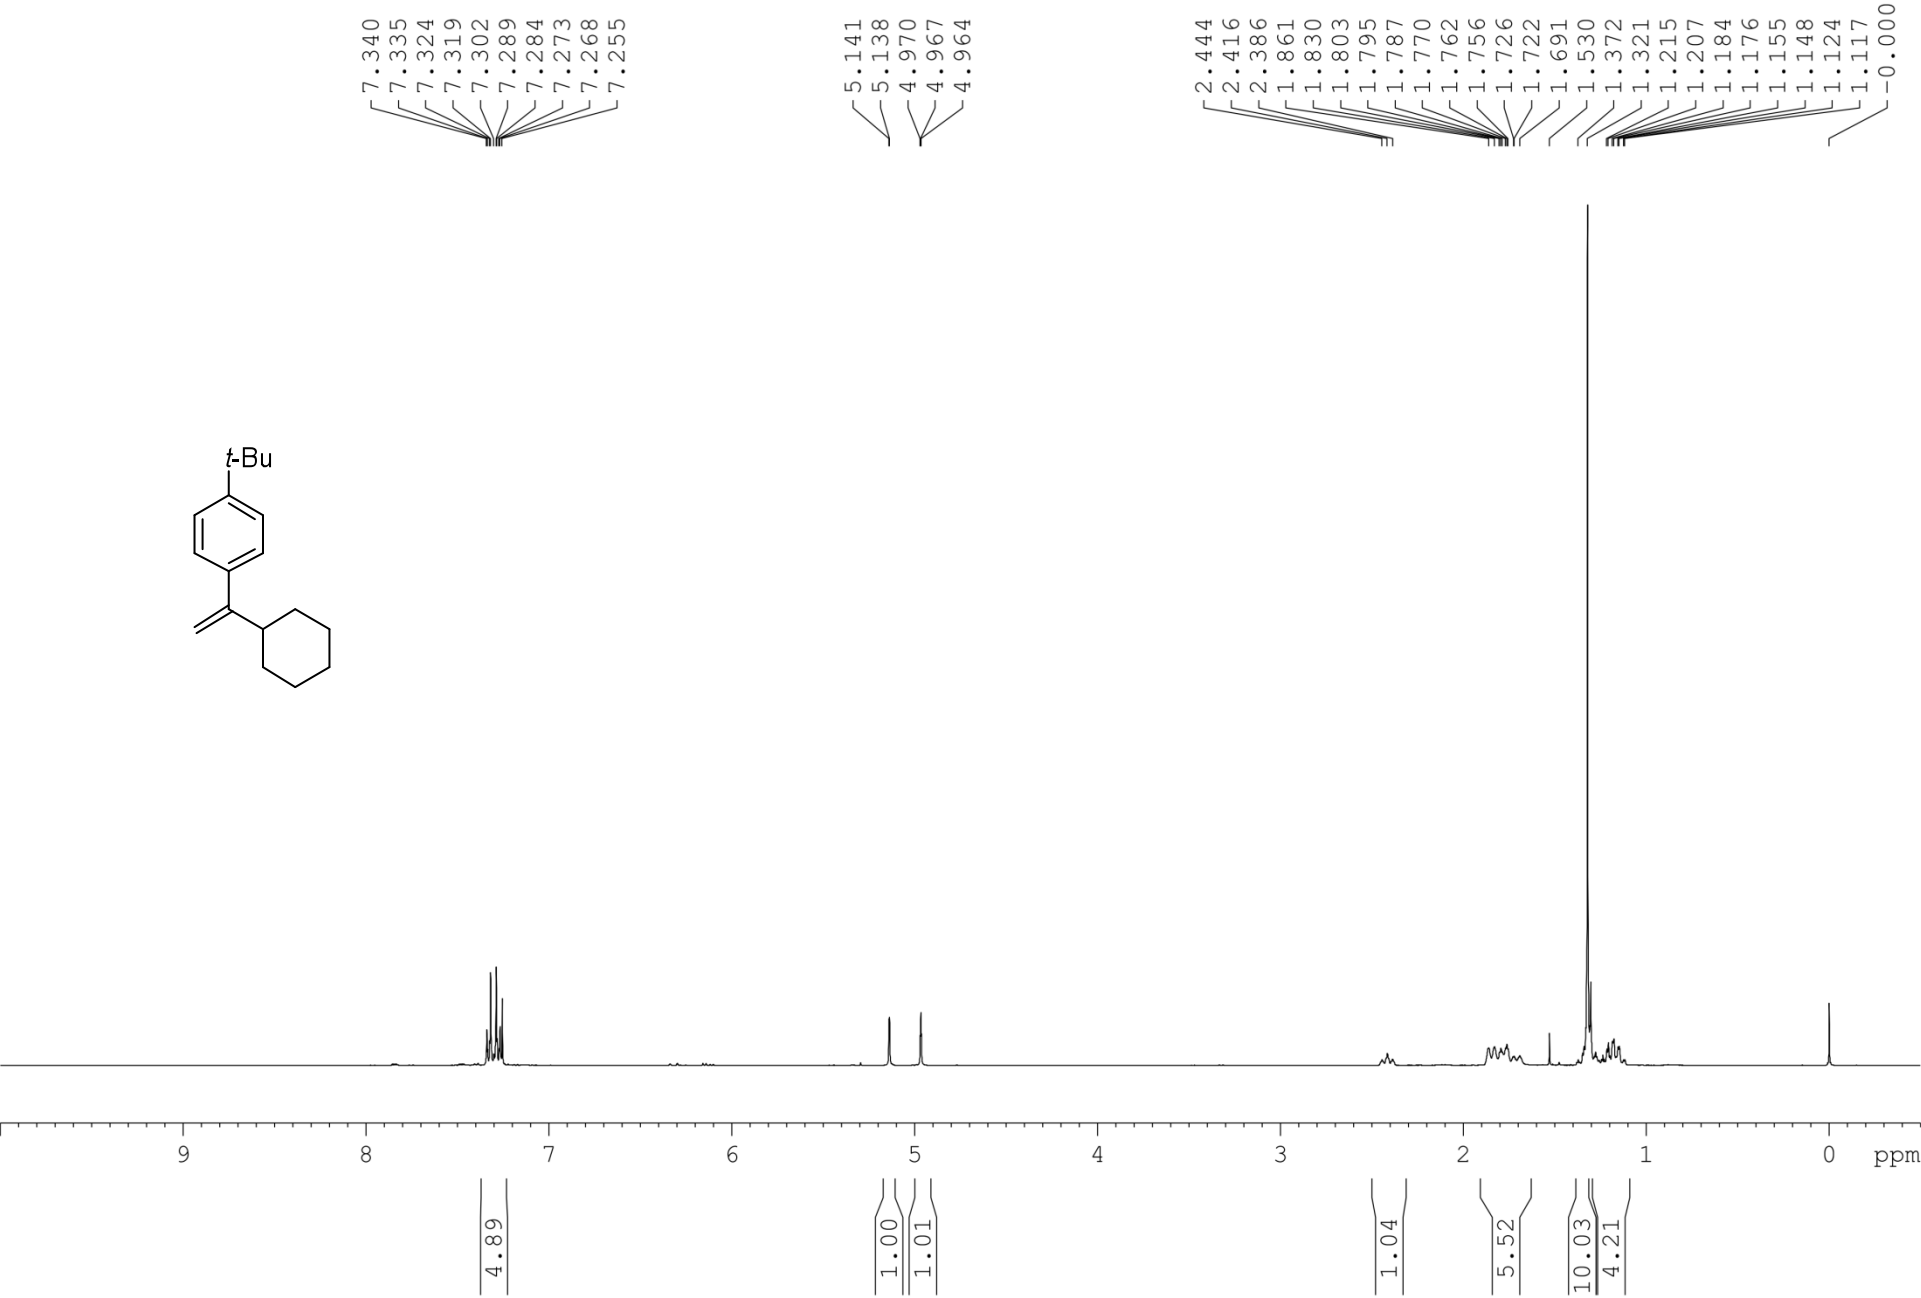

ln6127-4 C CDCl3 BBFO1 2013-3-27

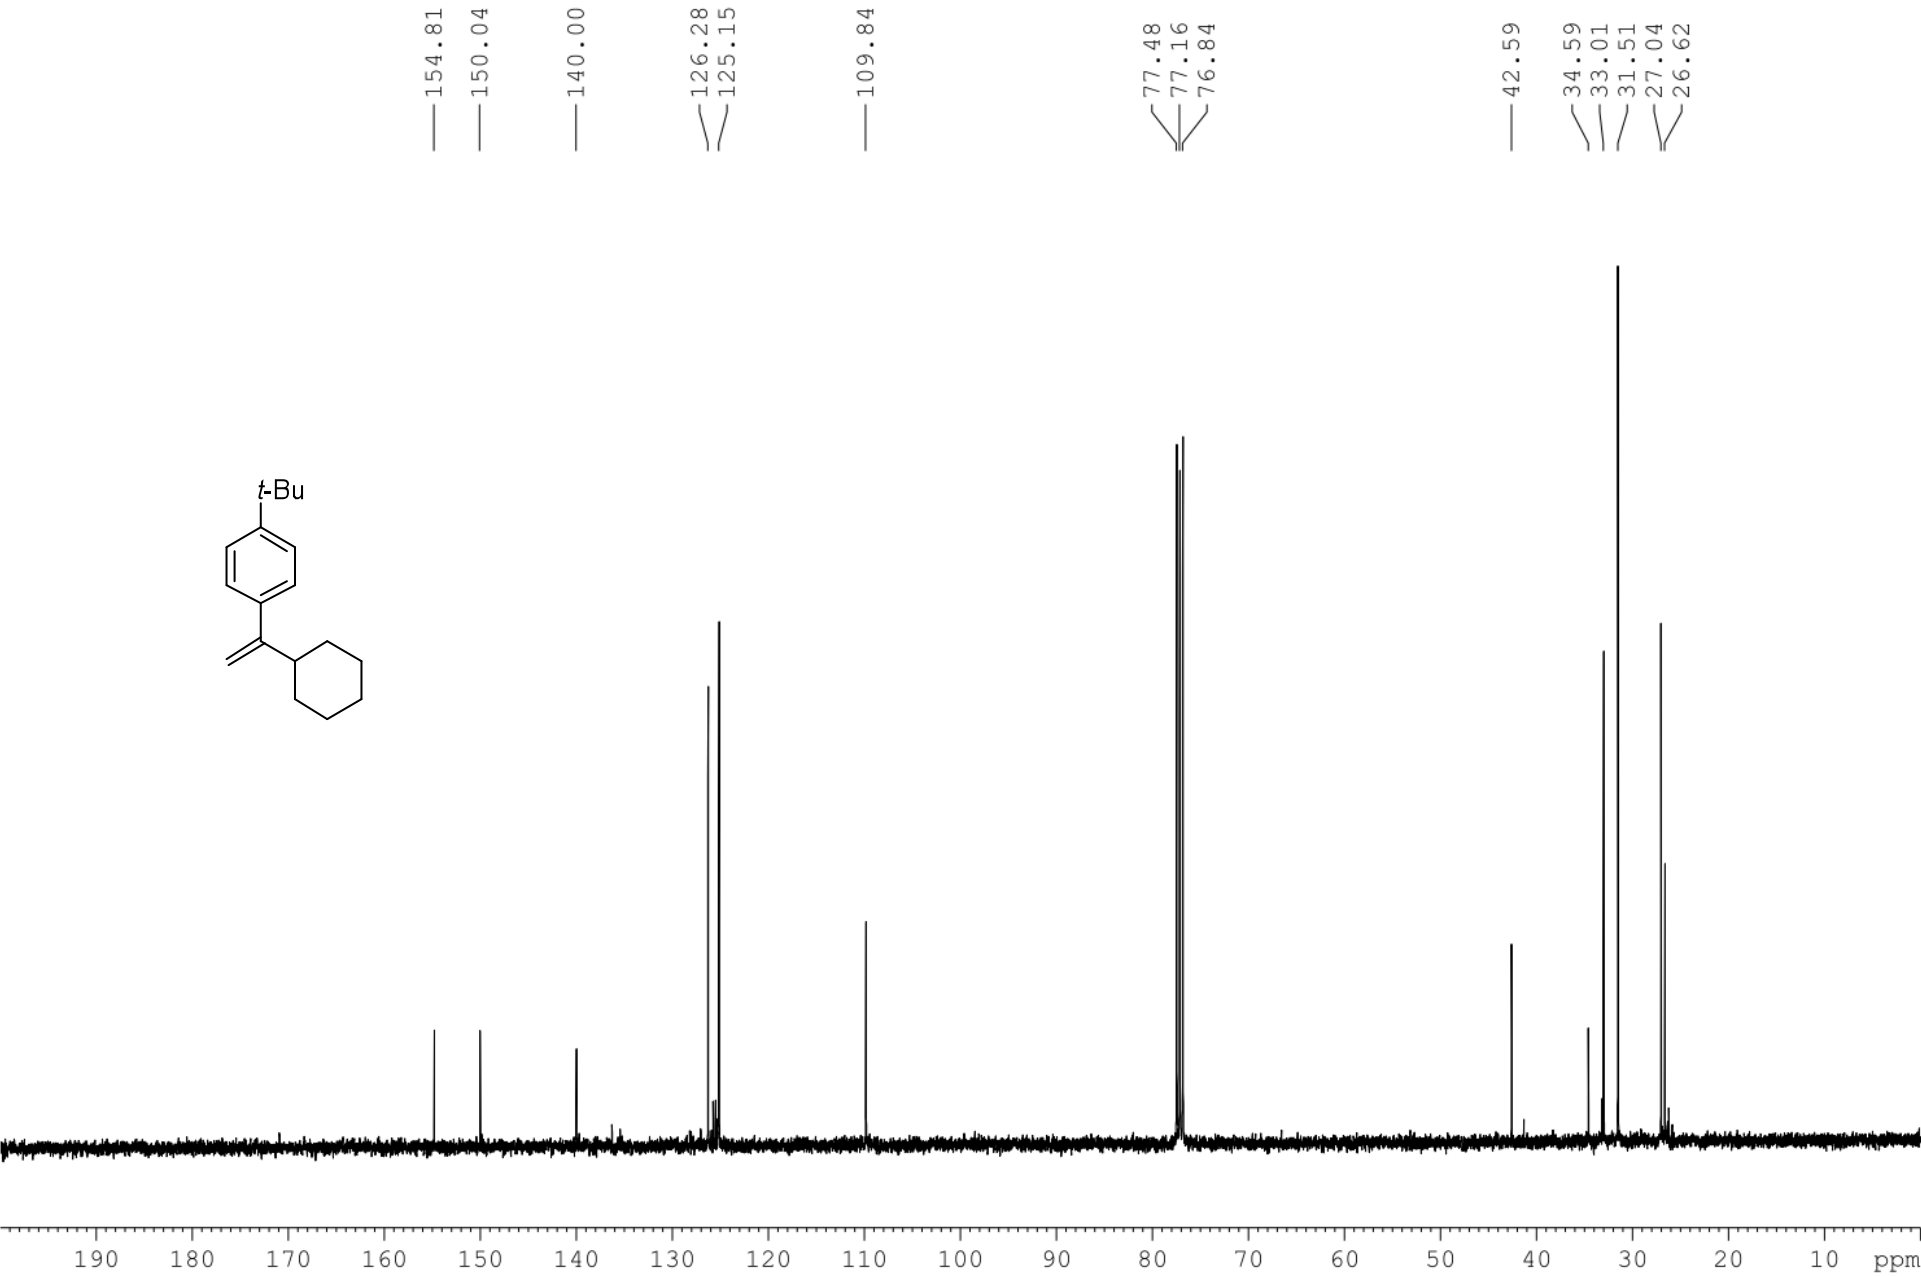

1n7019 H CDC13 AV400 2013-04-21

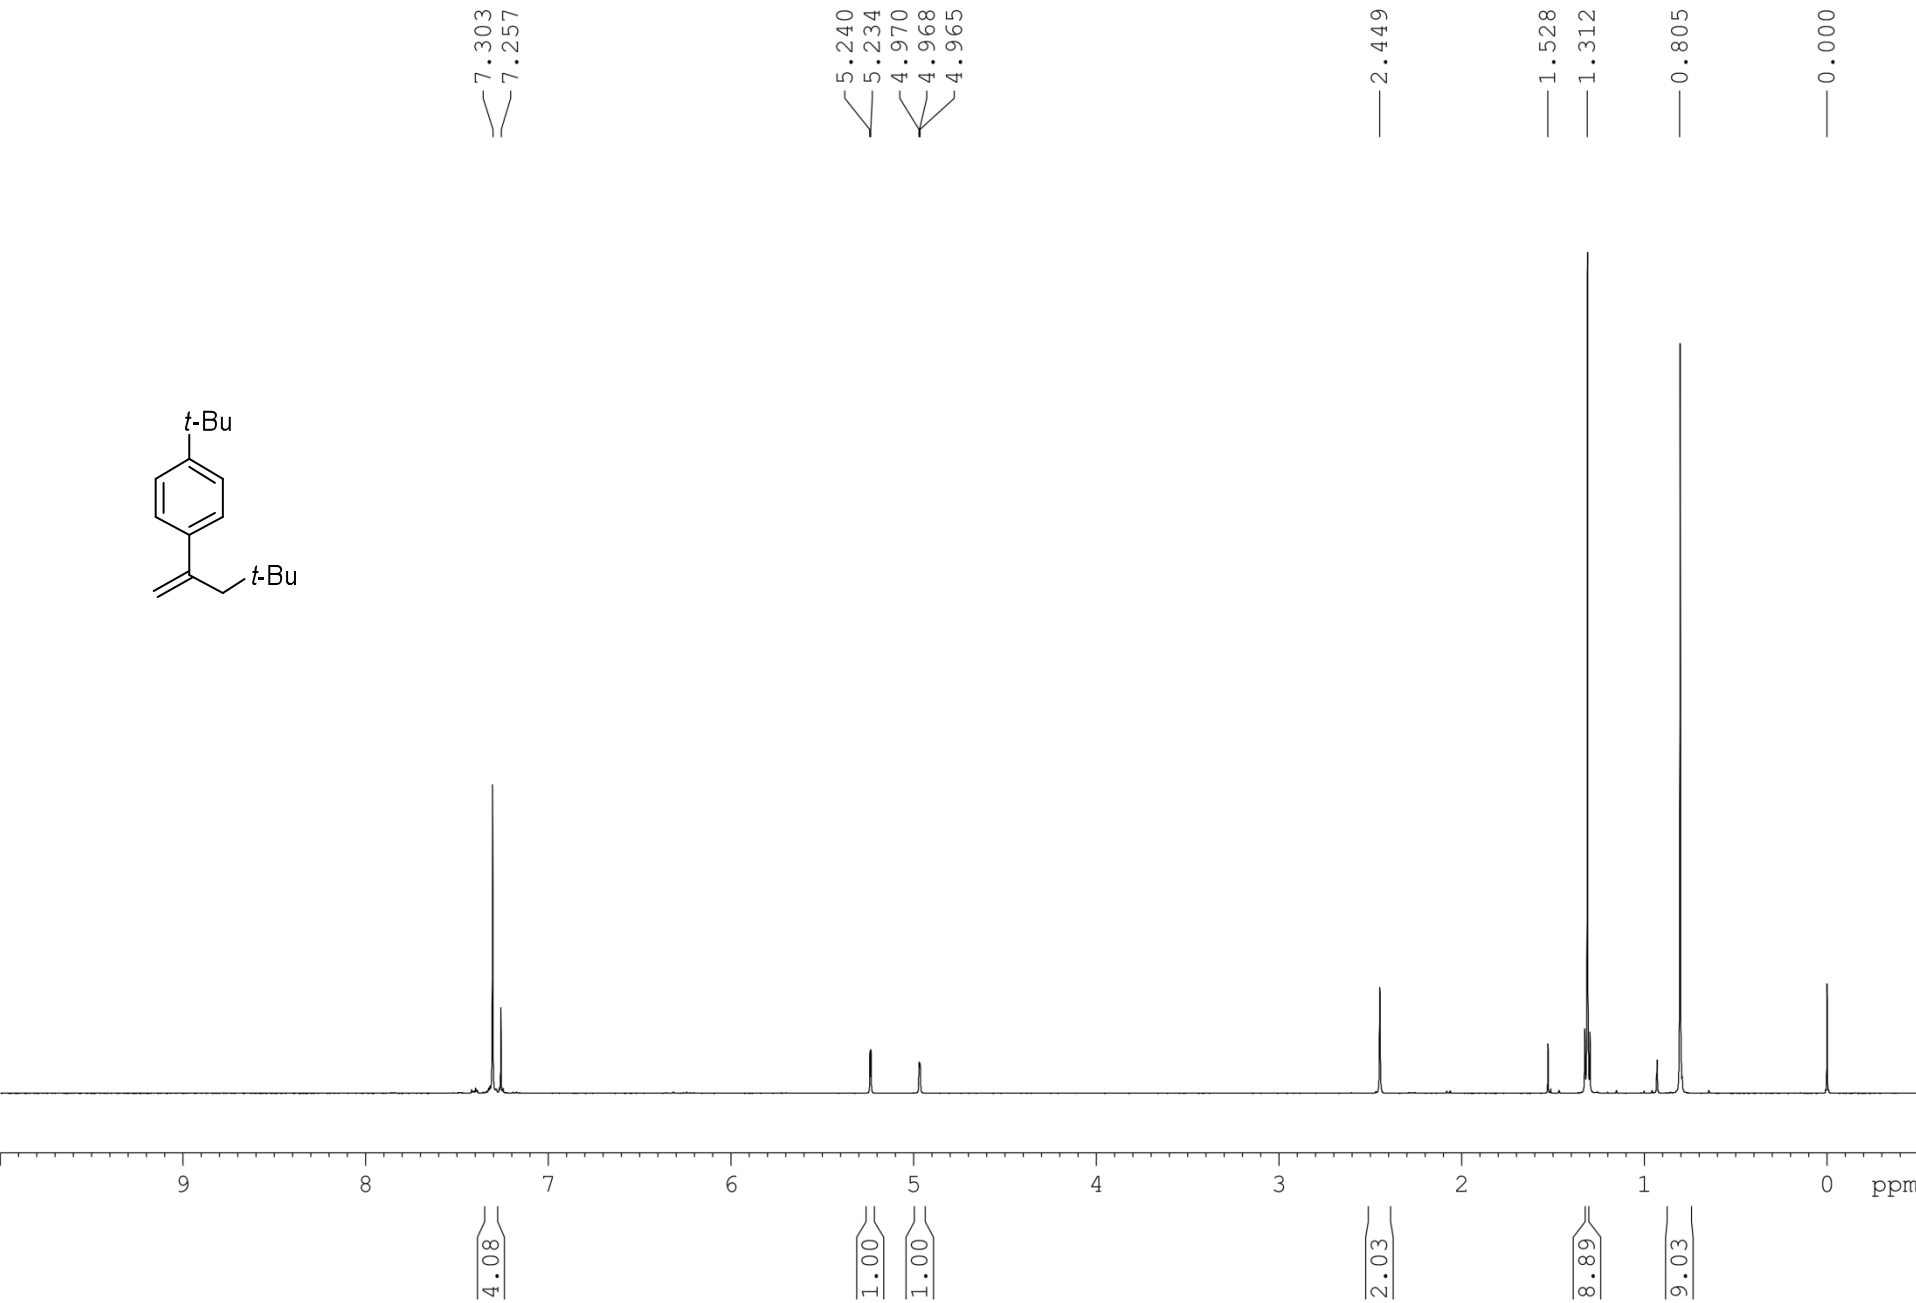

ln7062-P1 H CDC13 BBFO1 2013-05-31

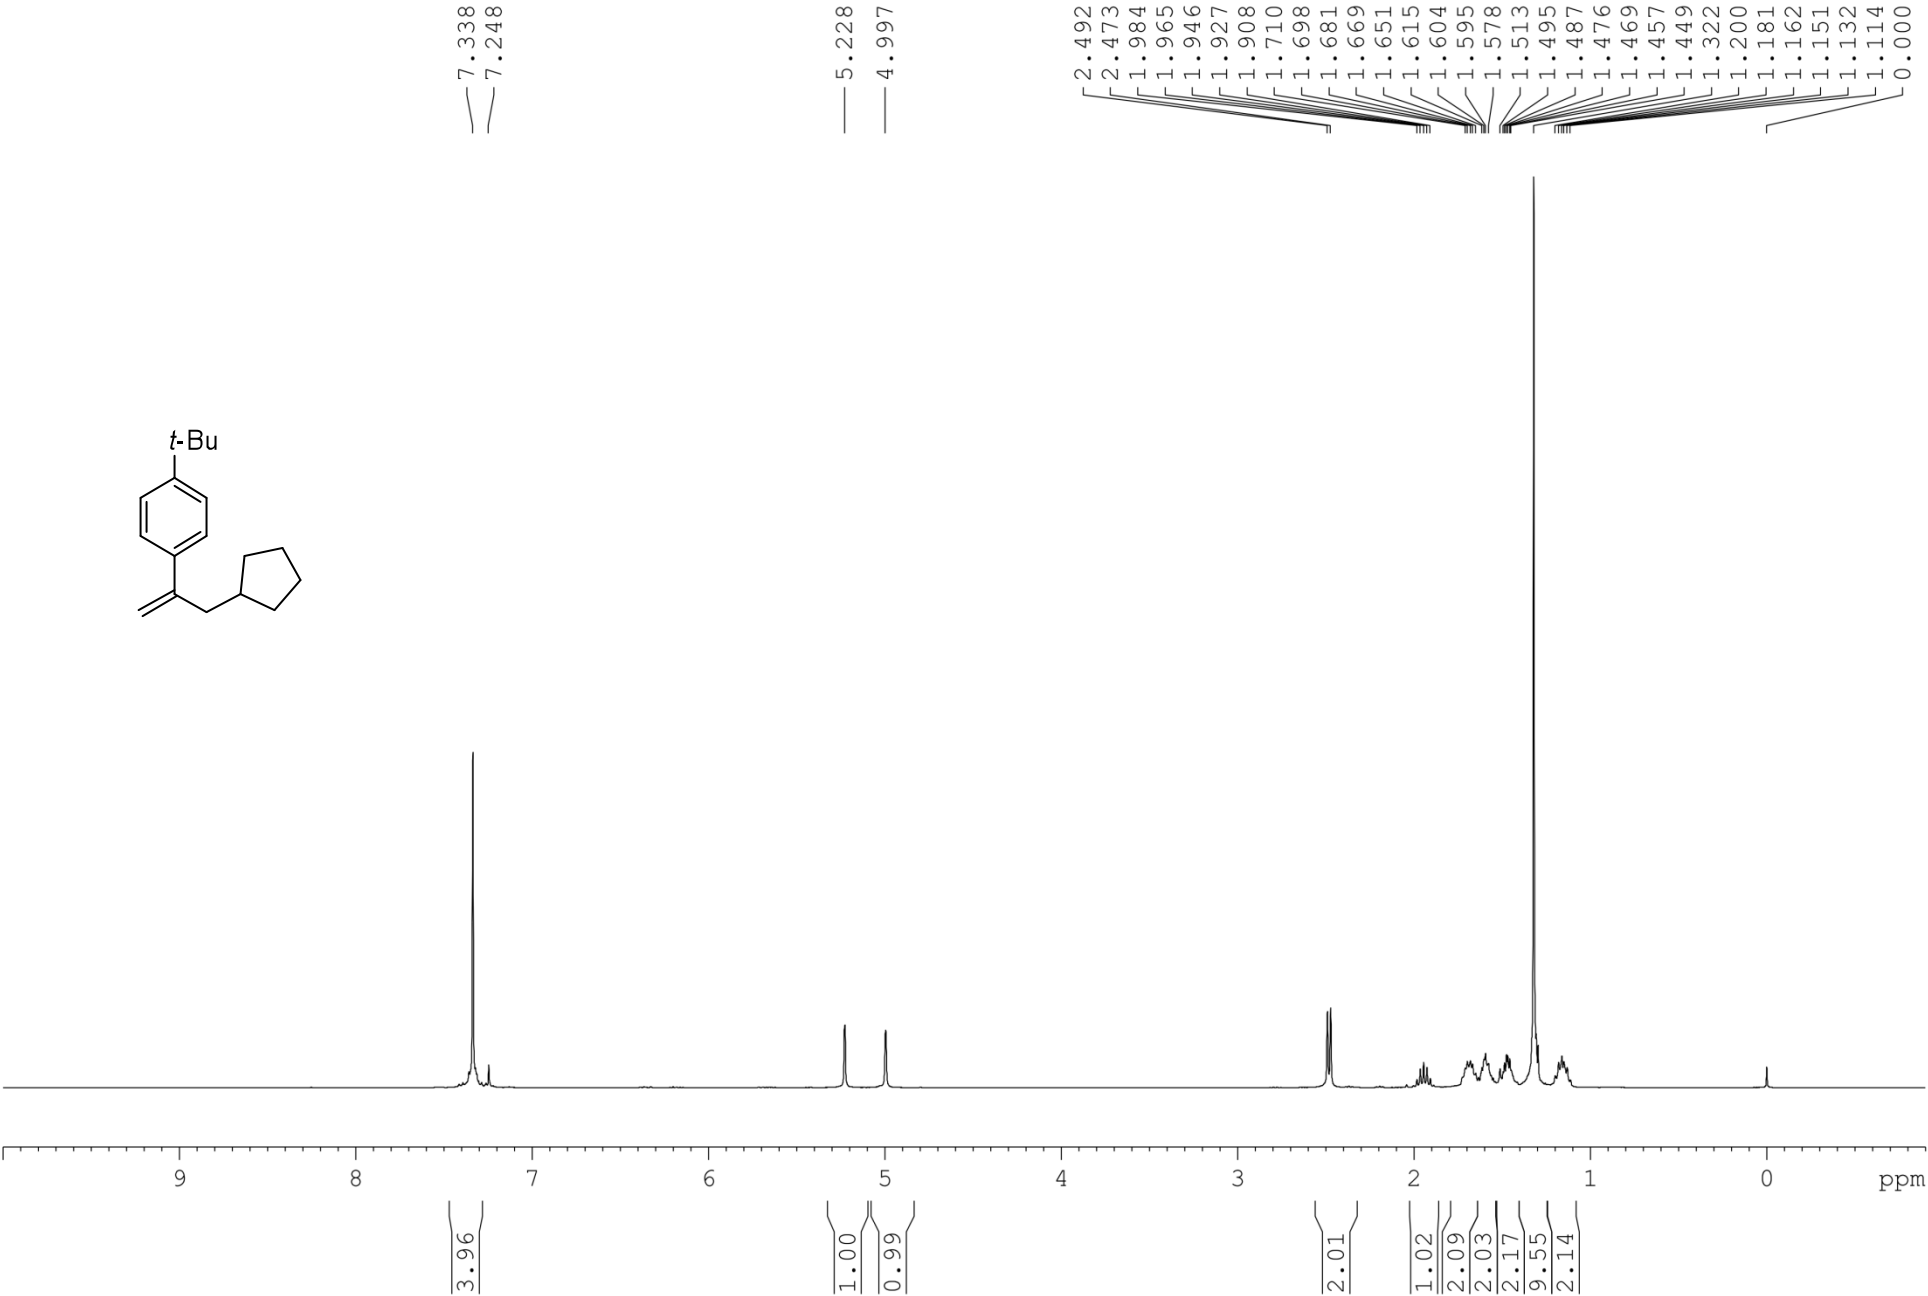

ln7062-P1 C CDC13 BBF01 2013-05-31

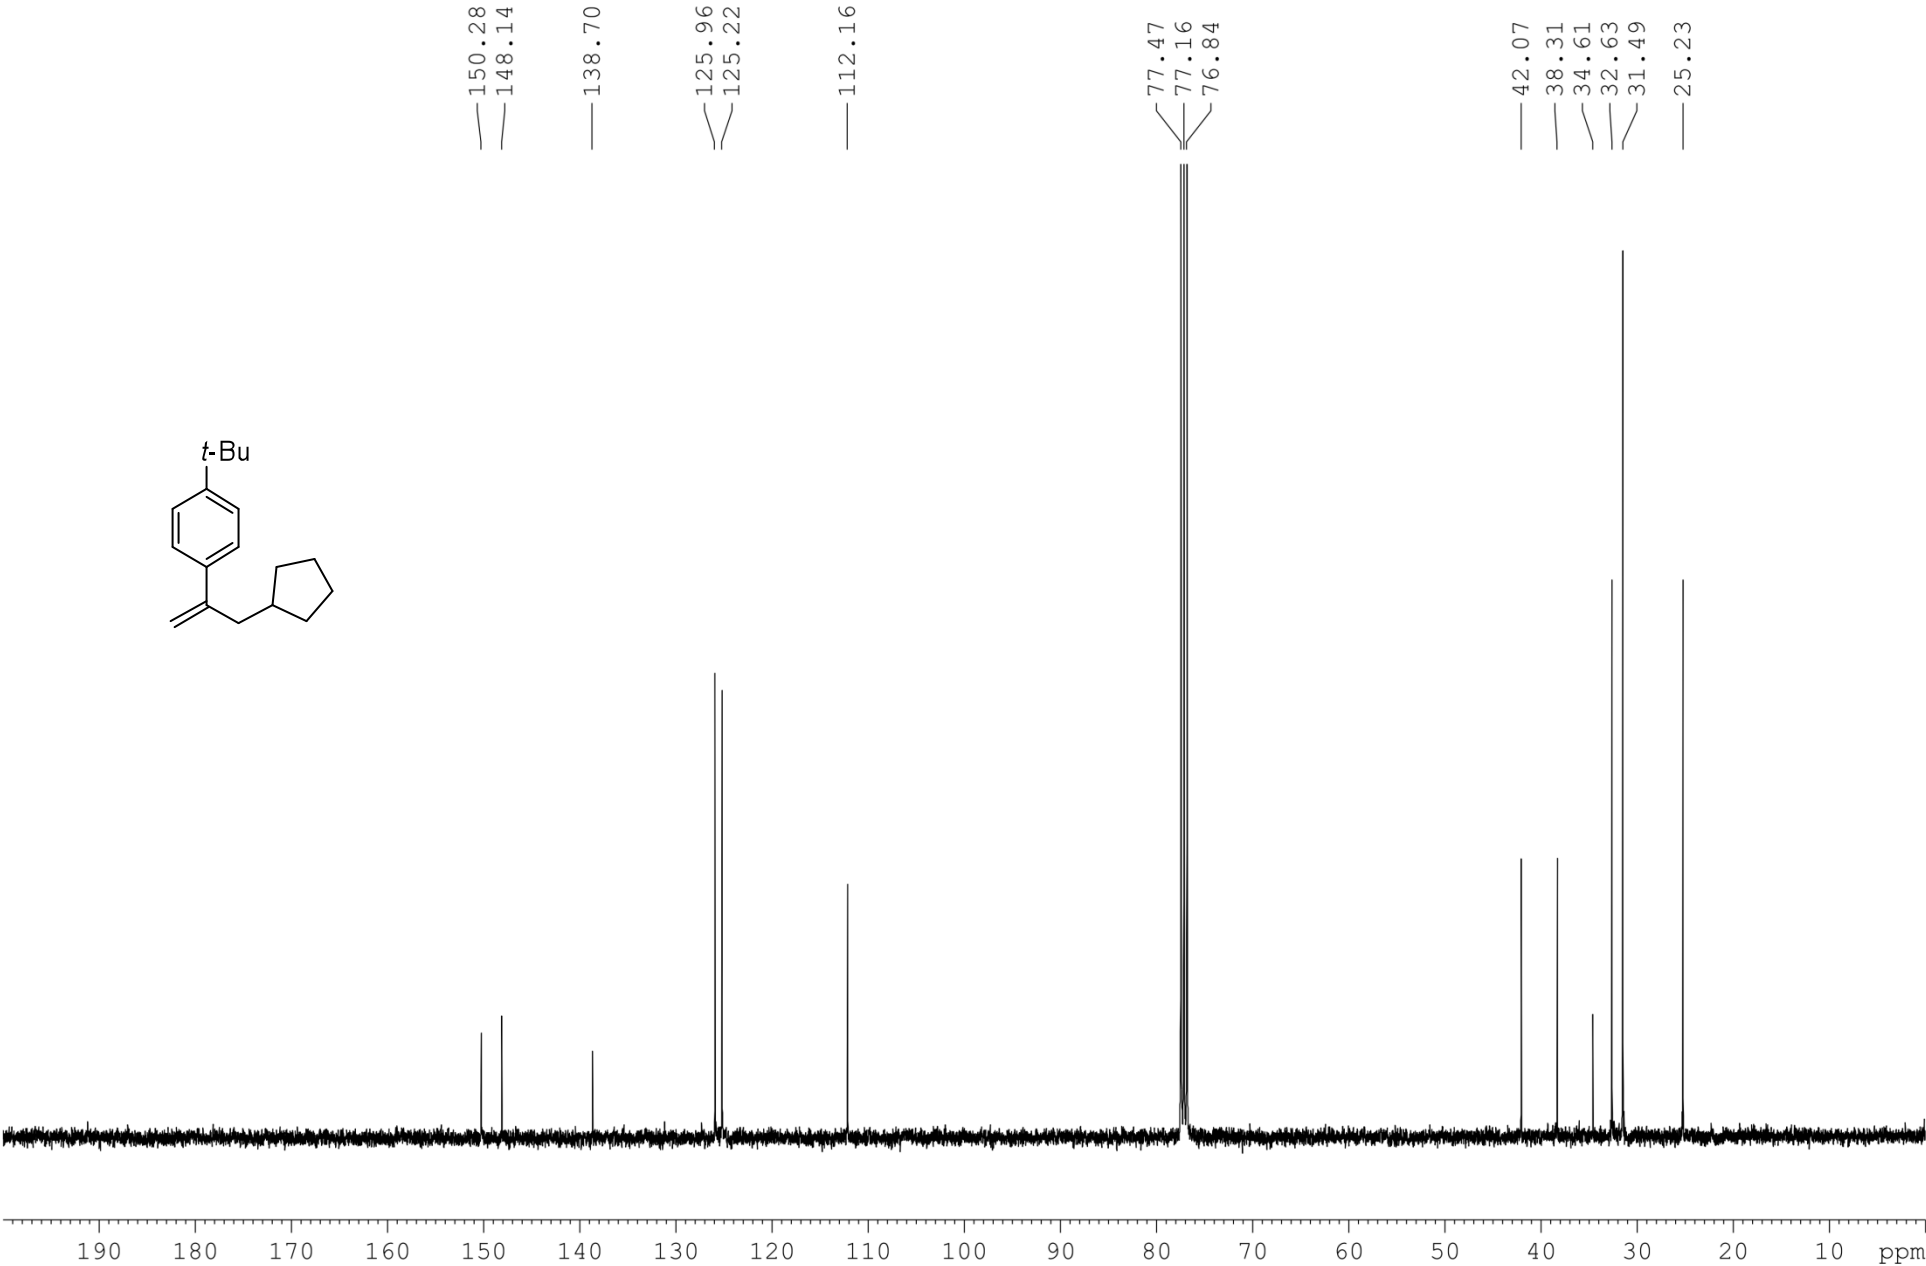

ln6122-3 H CDC13 BBFO1 2013-3-4

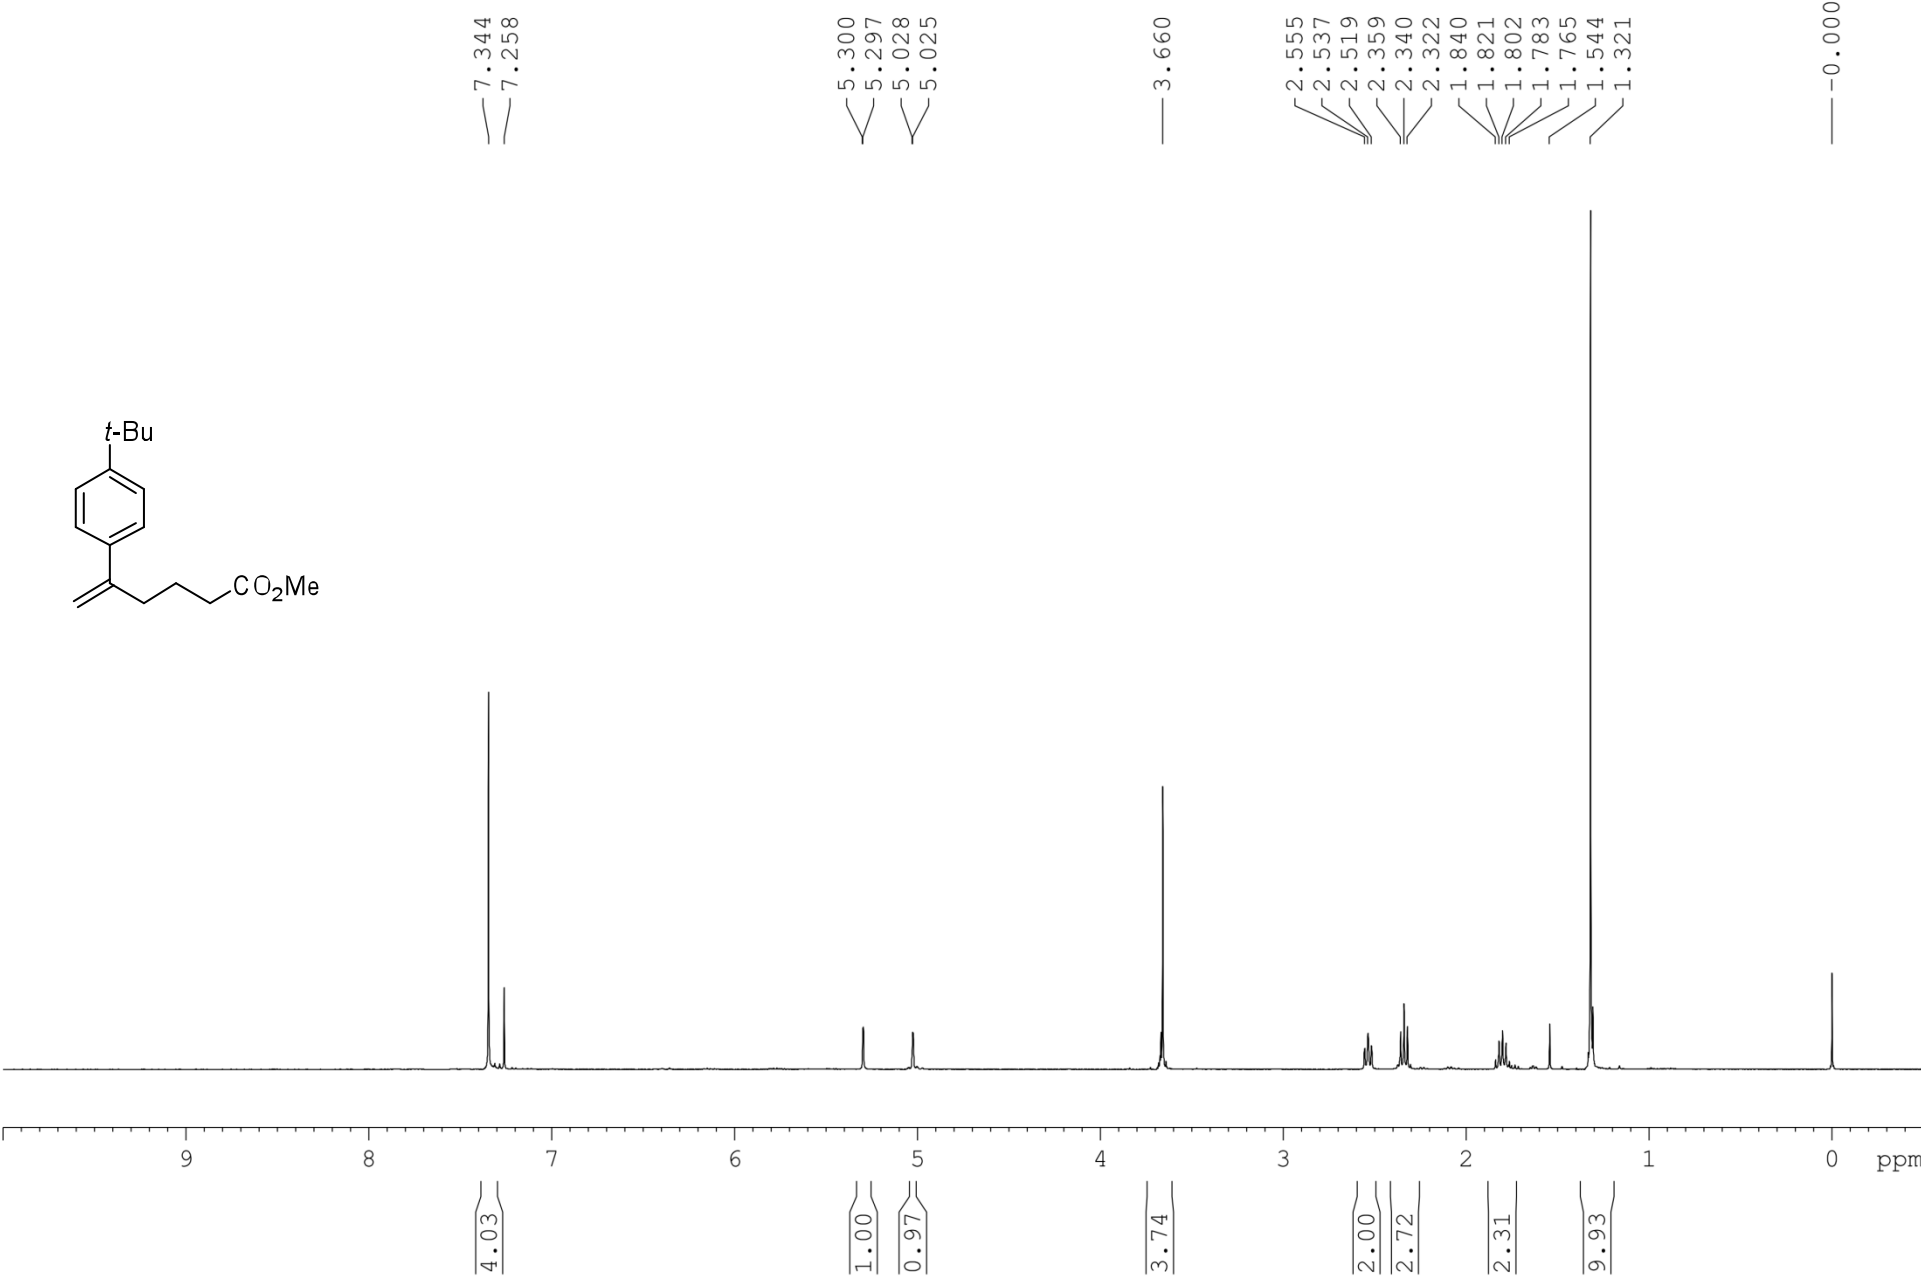



LN4094-4-H CDC13 BBFO1 Nov 4 2011

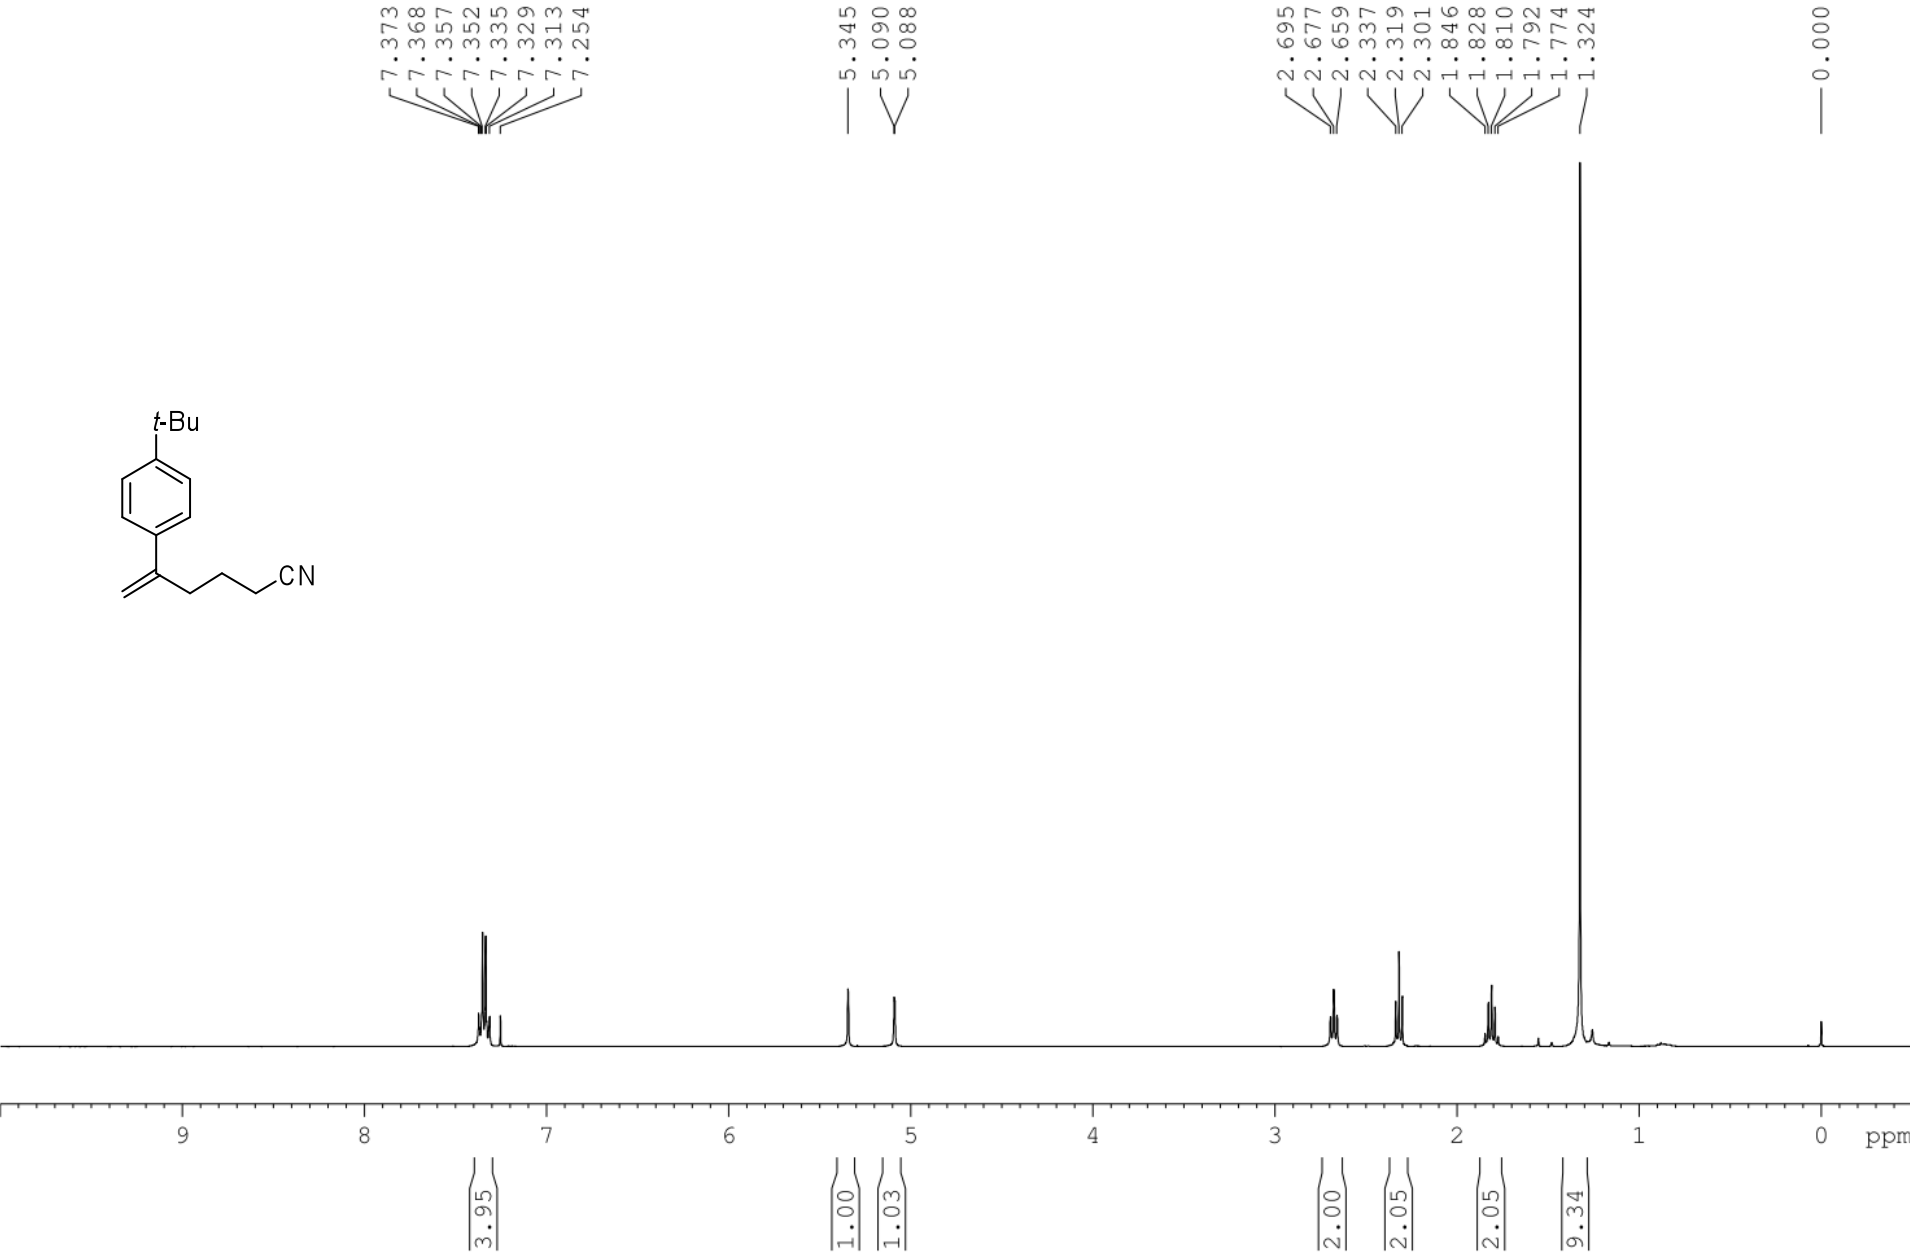

LN4094-4-C CDC13 BBFO1 Nov 4 2011

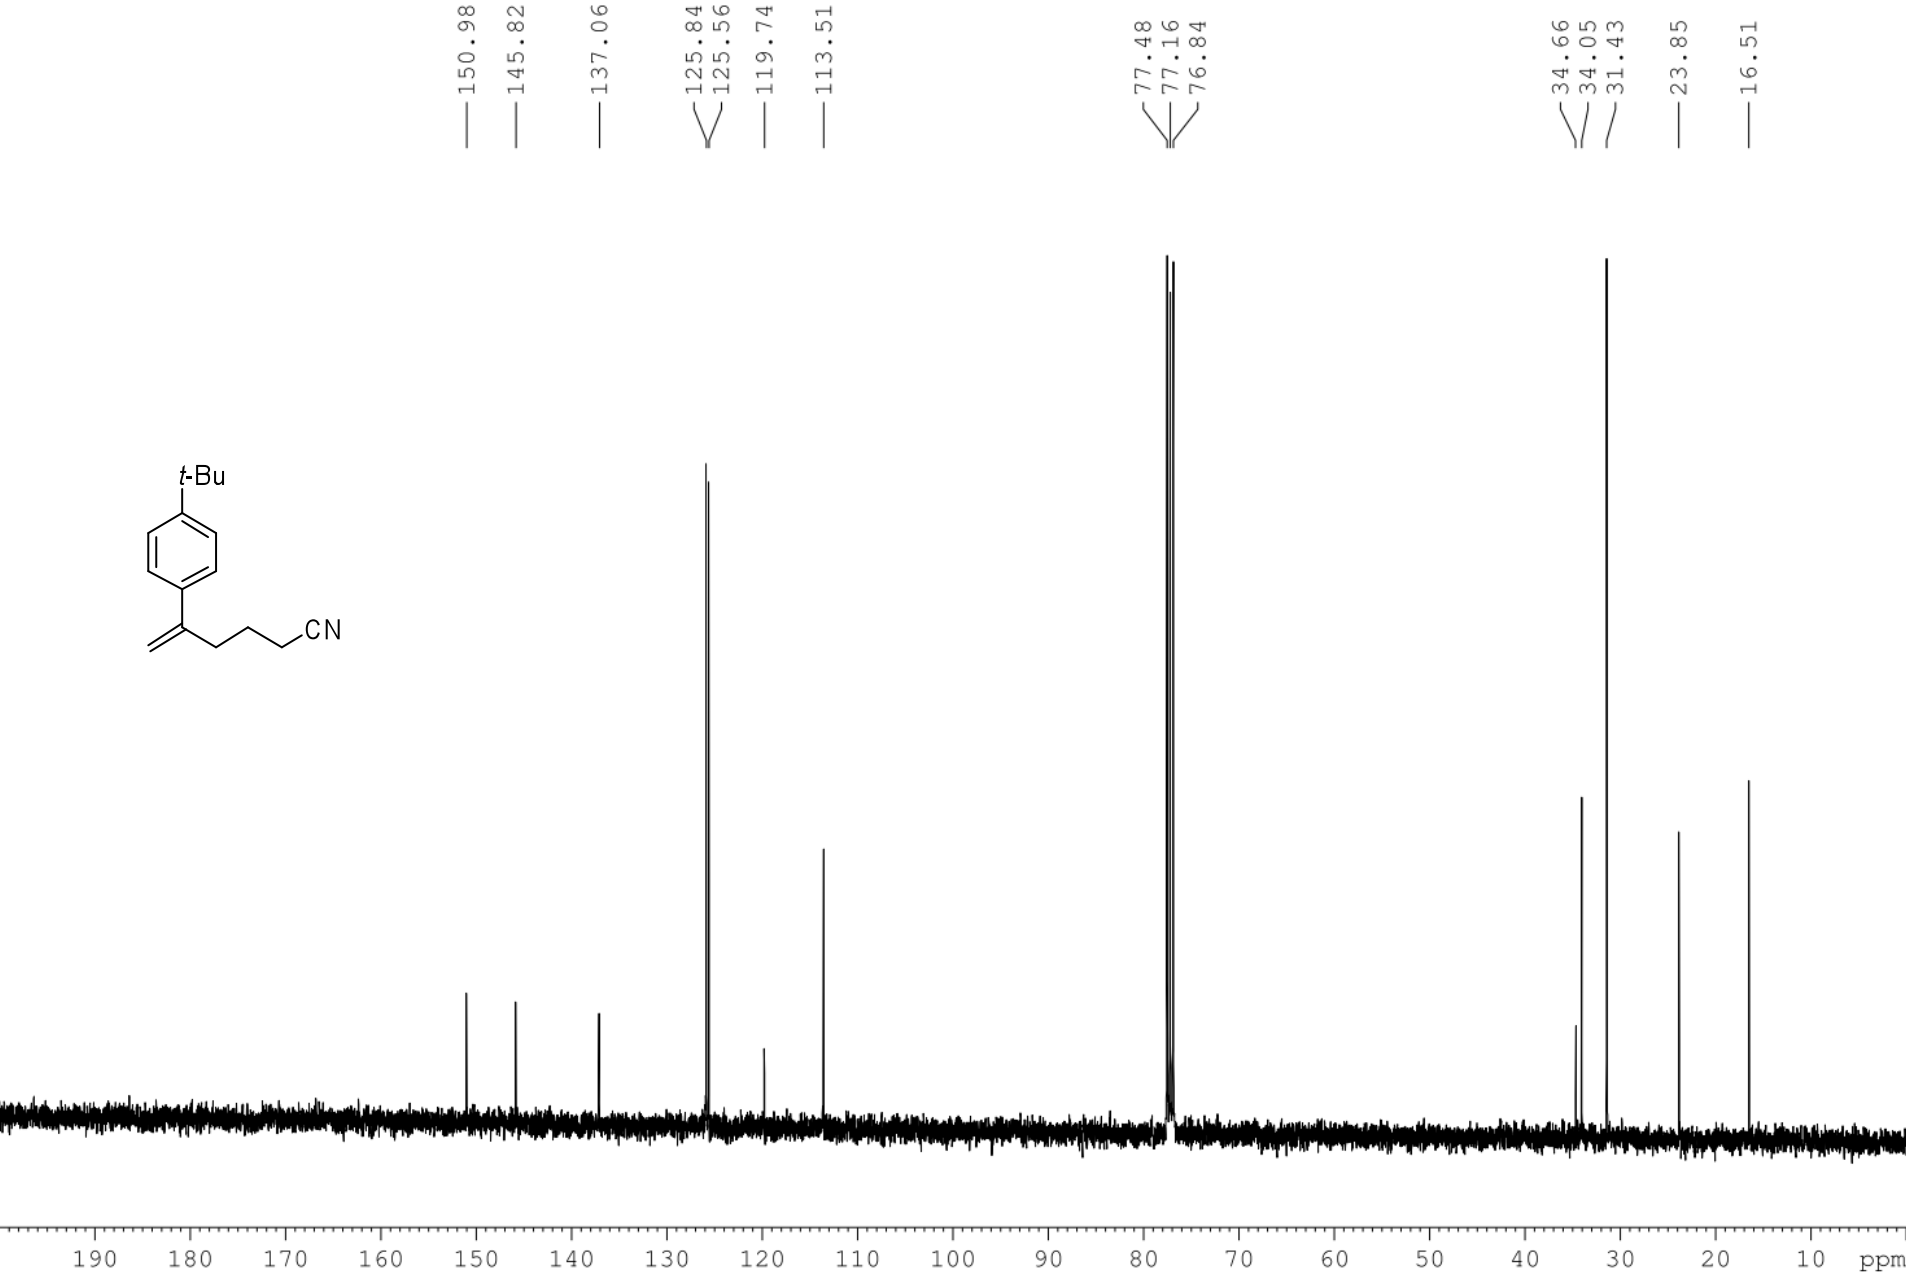

LN6127-6-H CDC13 BBFO1 2013-06-17

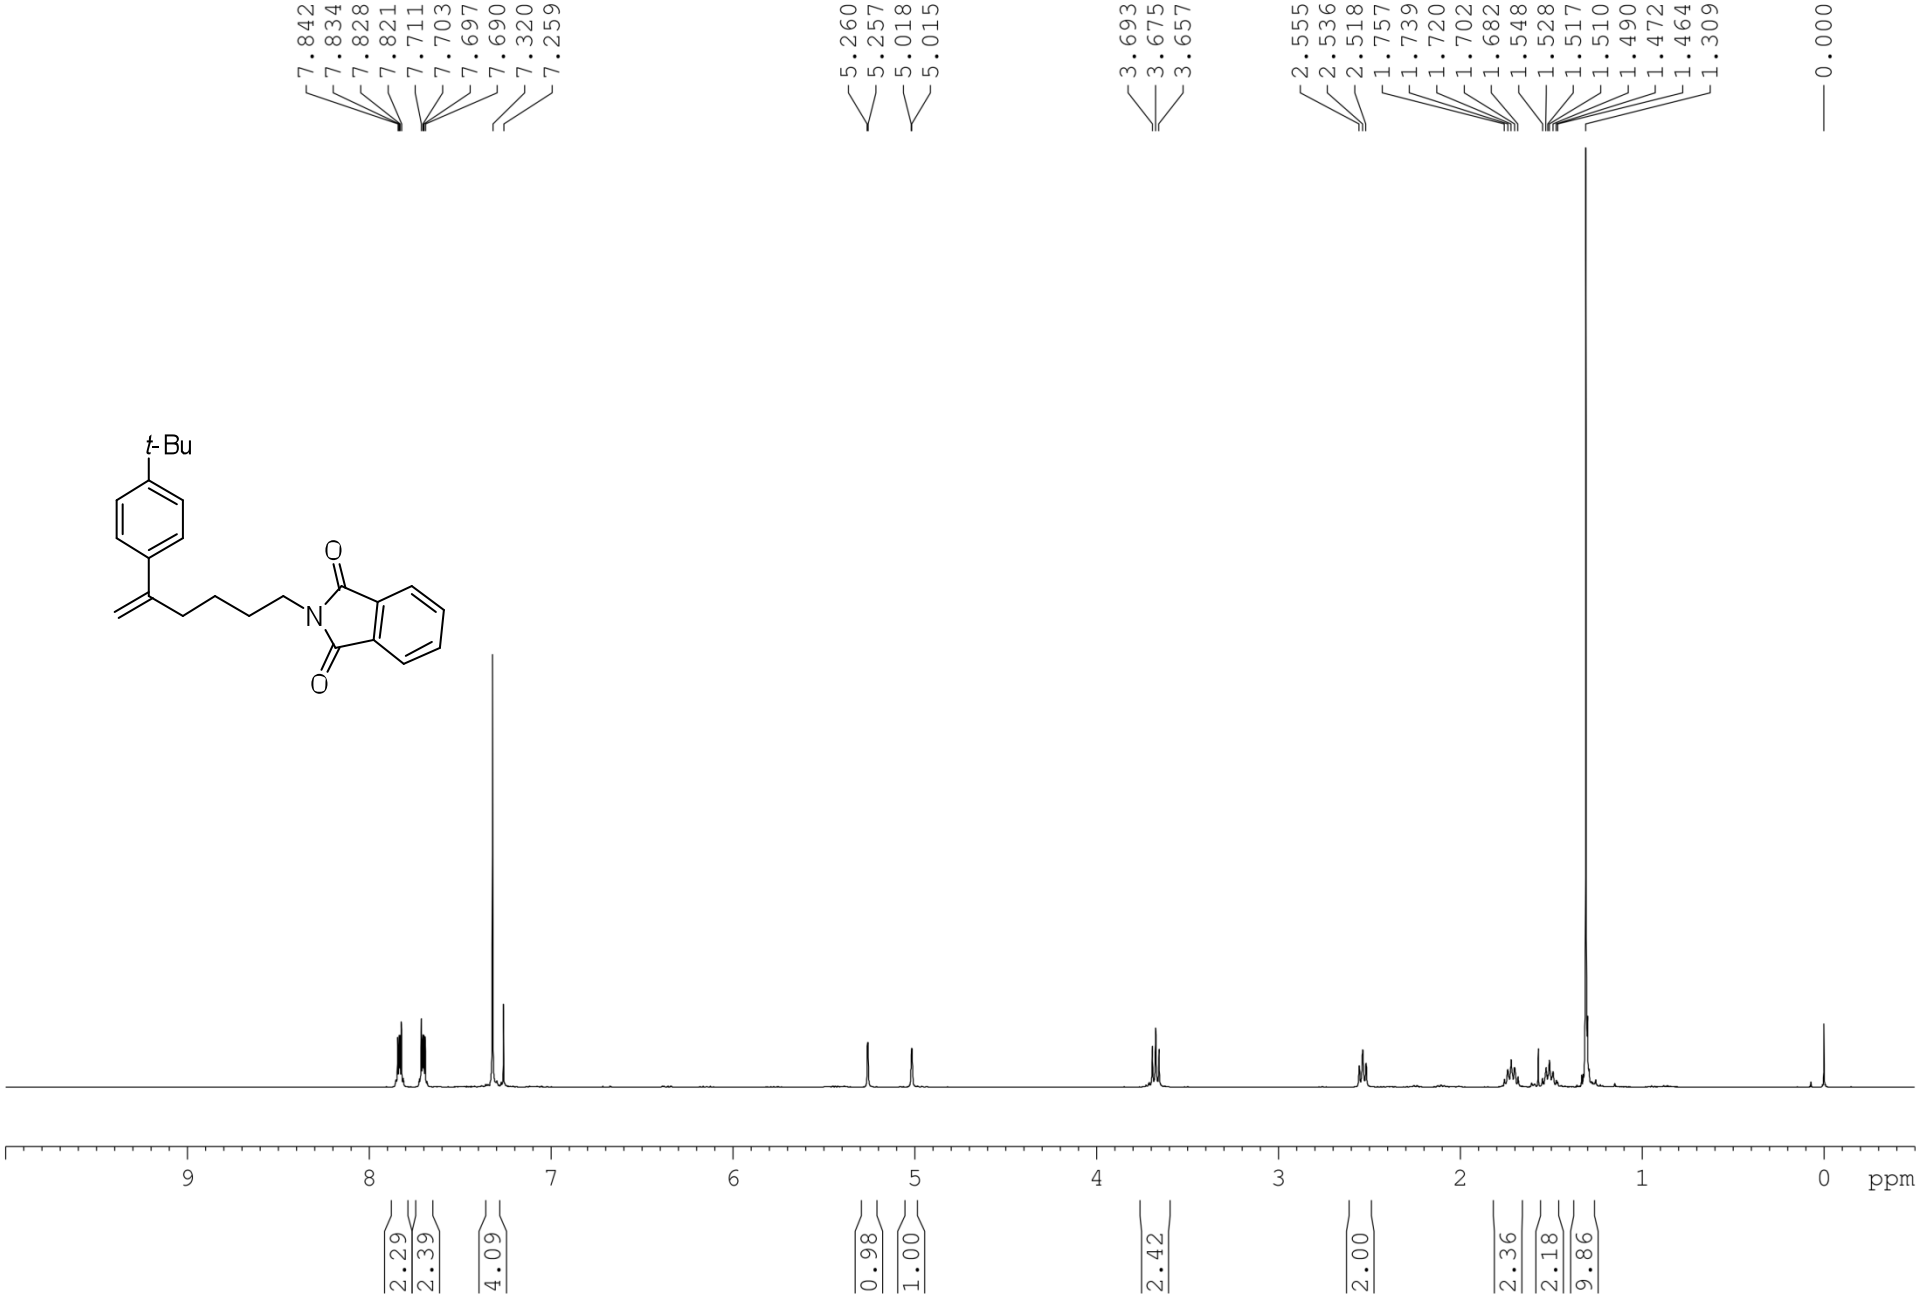

LN6127-5-H CDC13 BBFO1 2013-3-10

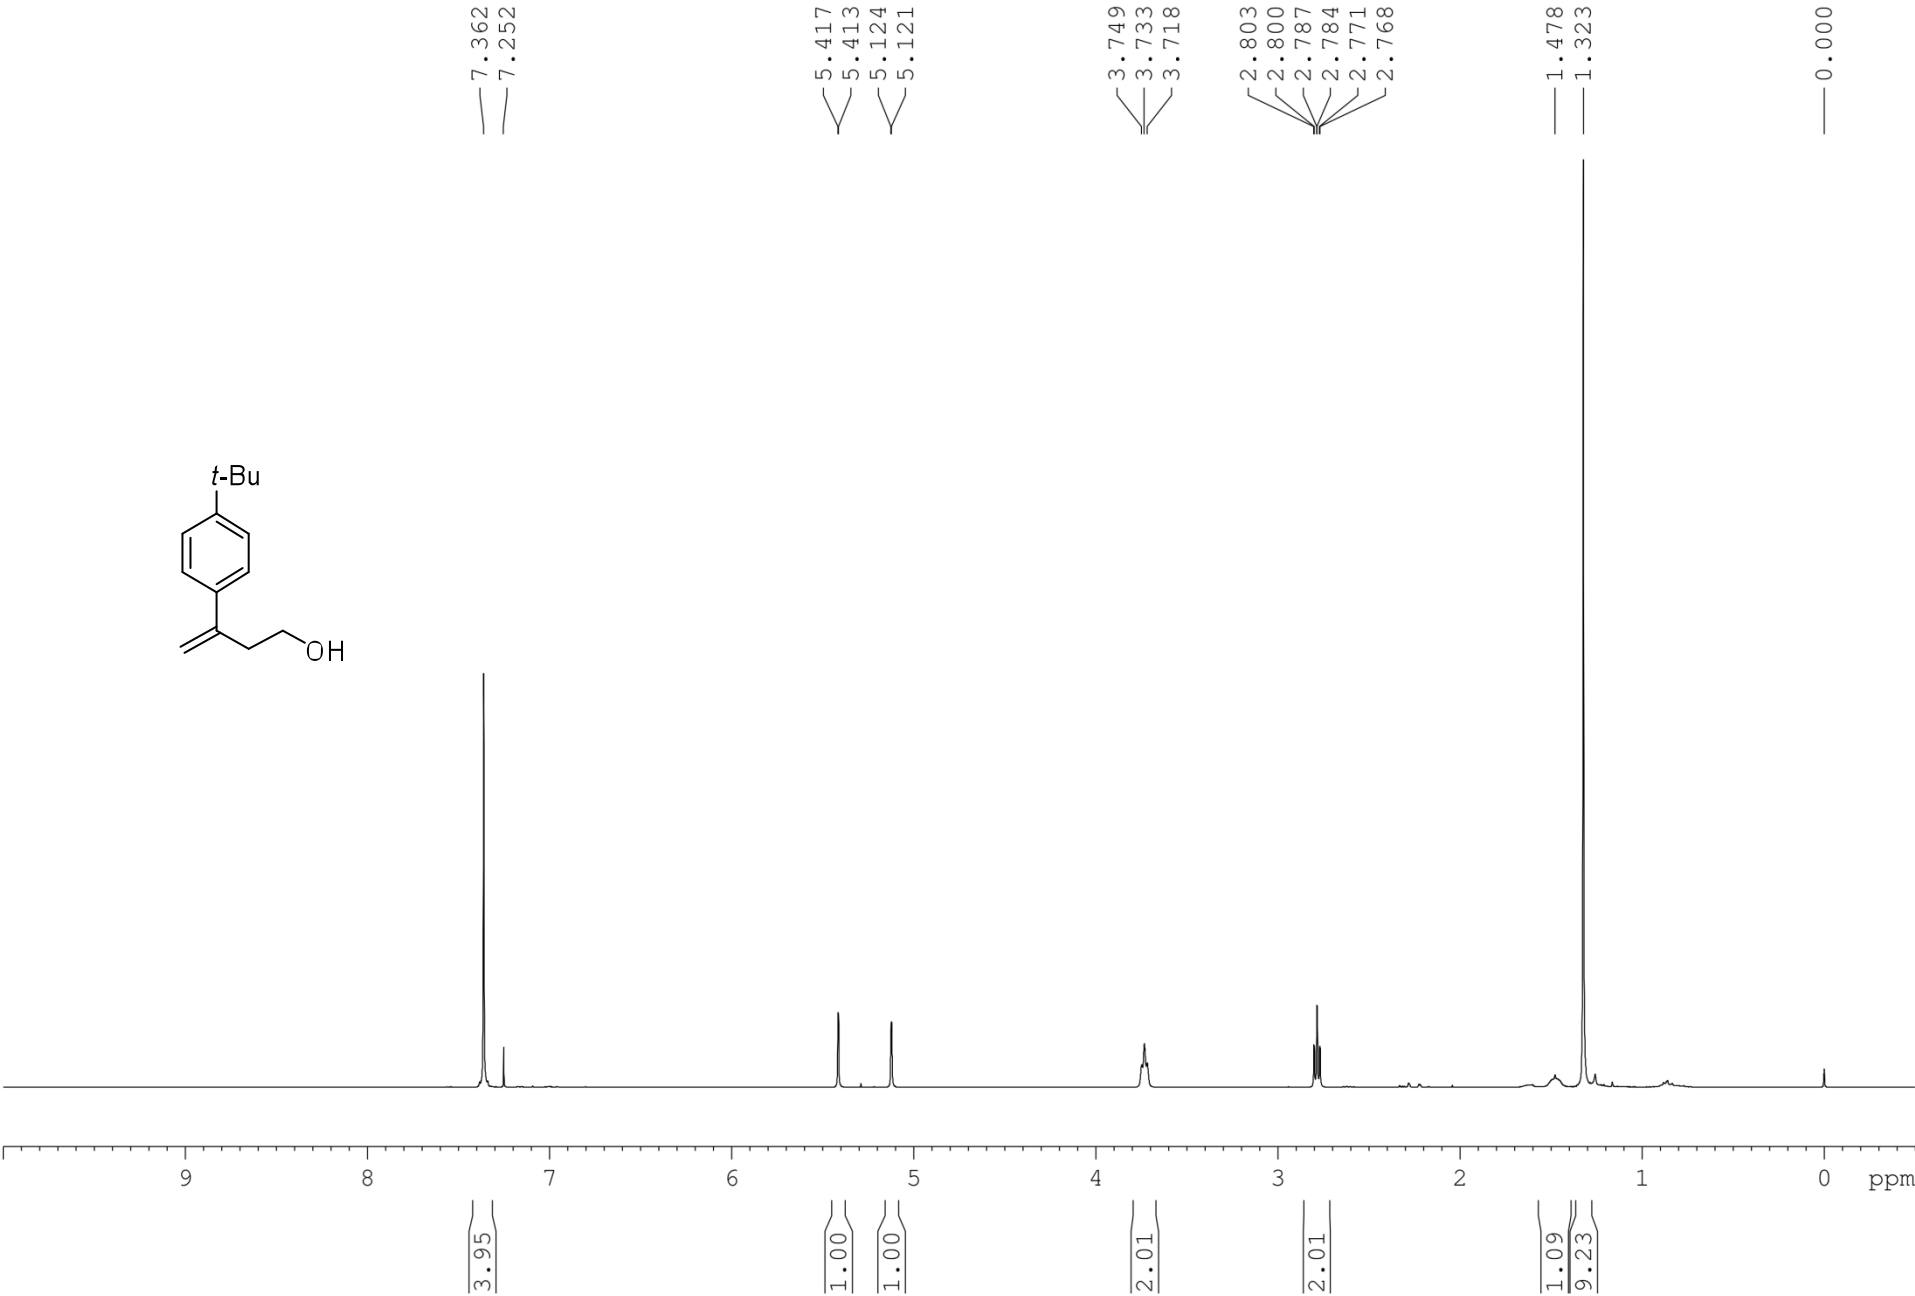

LN6144-H CDC13 BBFO1 2013-3-31

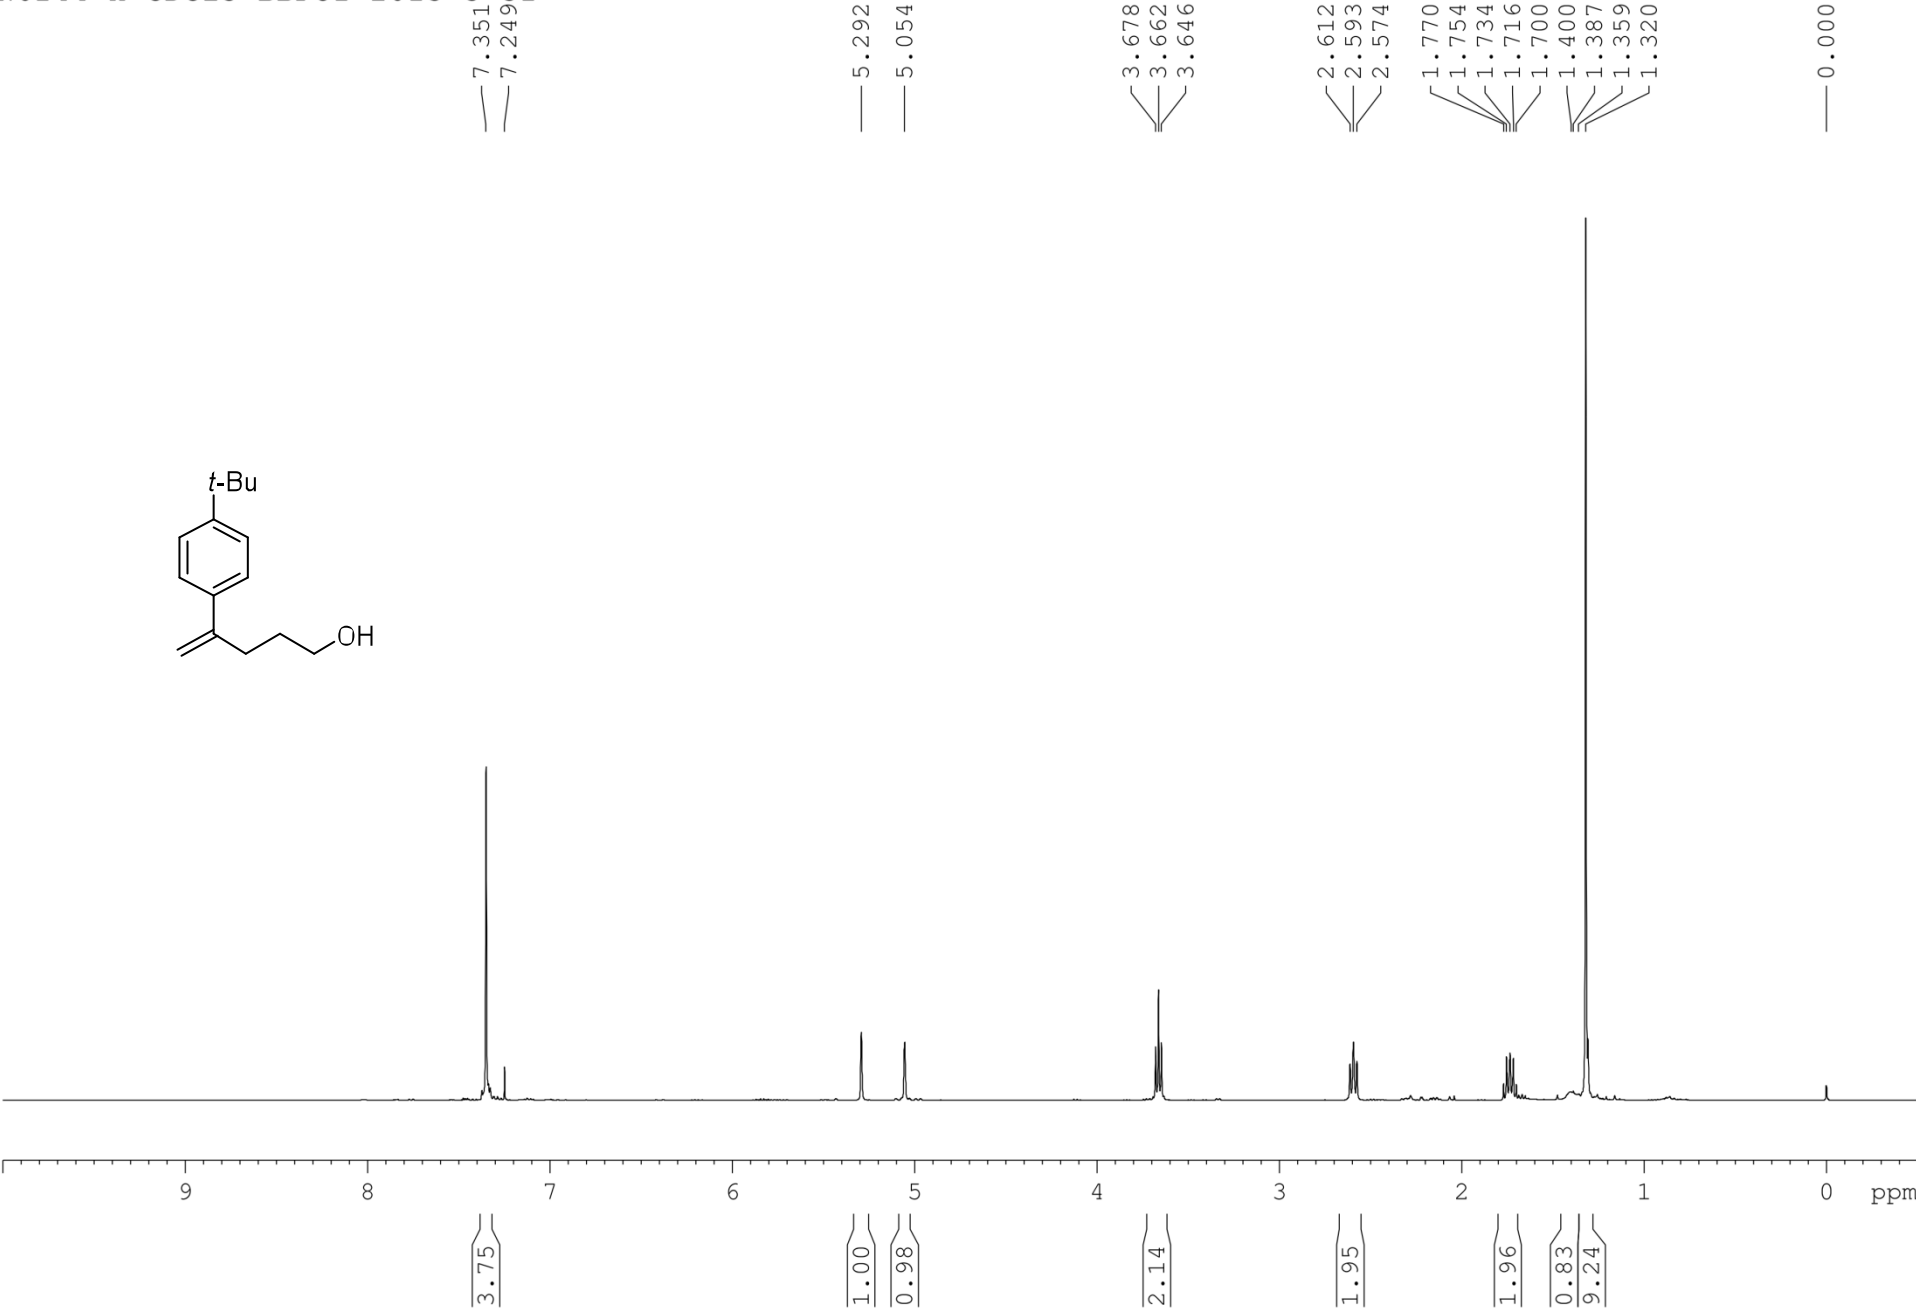

ln6117-1 H CDC13 BBFO1 2013-3-1

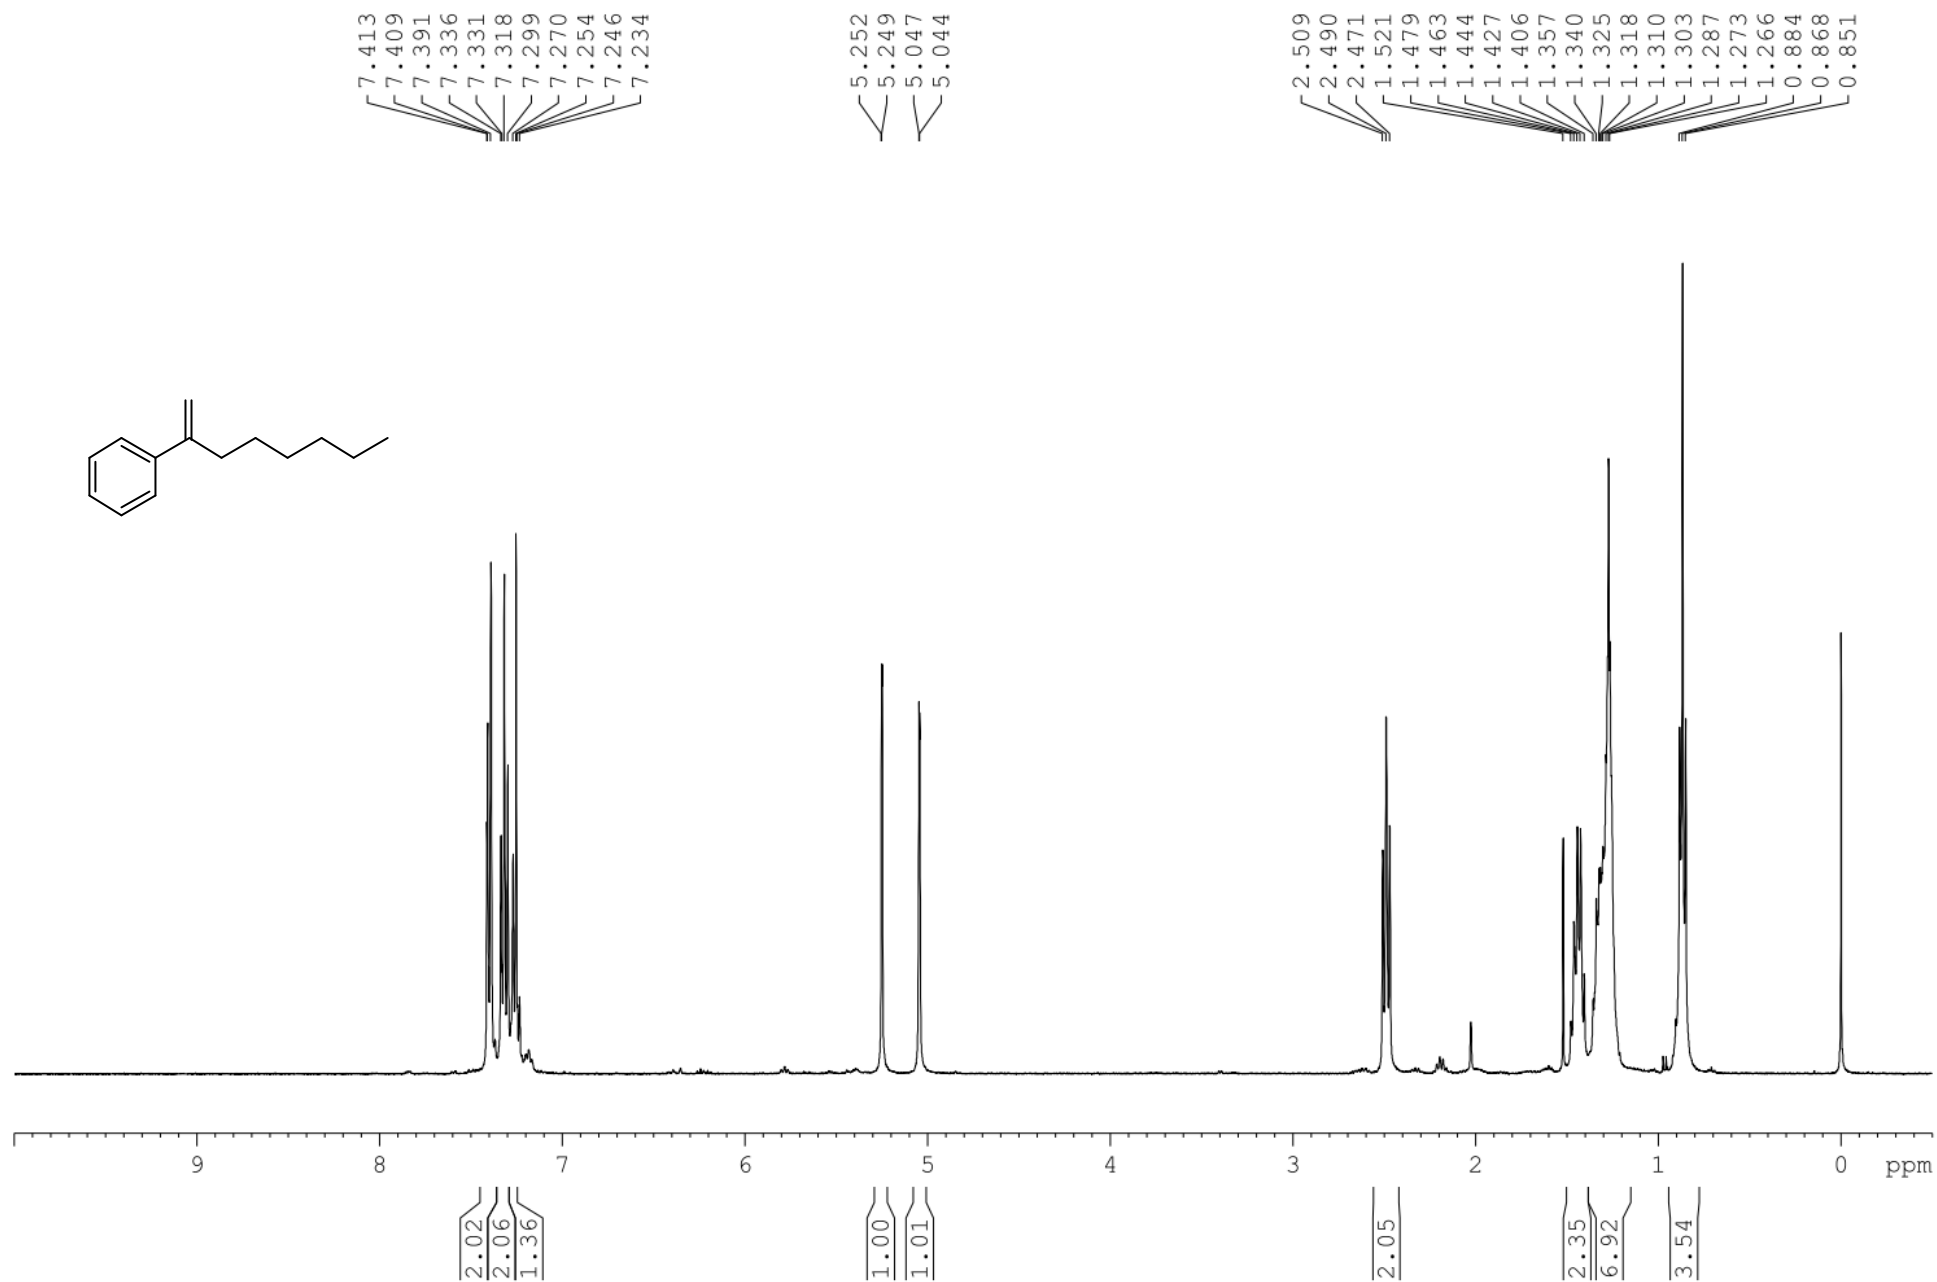

ln6117-2 H CDC13 BBFO1 2013-3-1

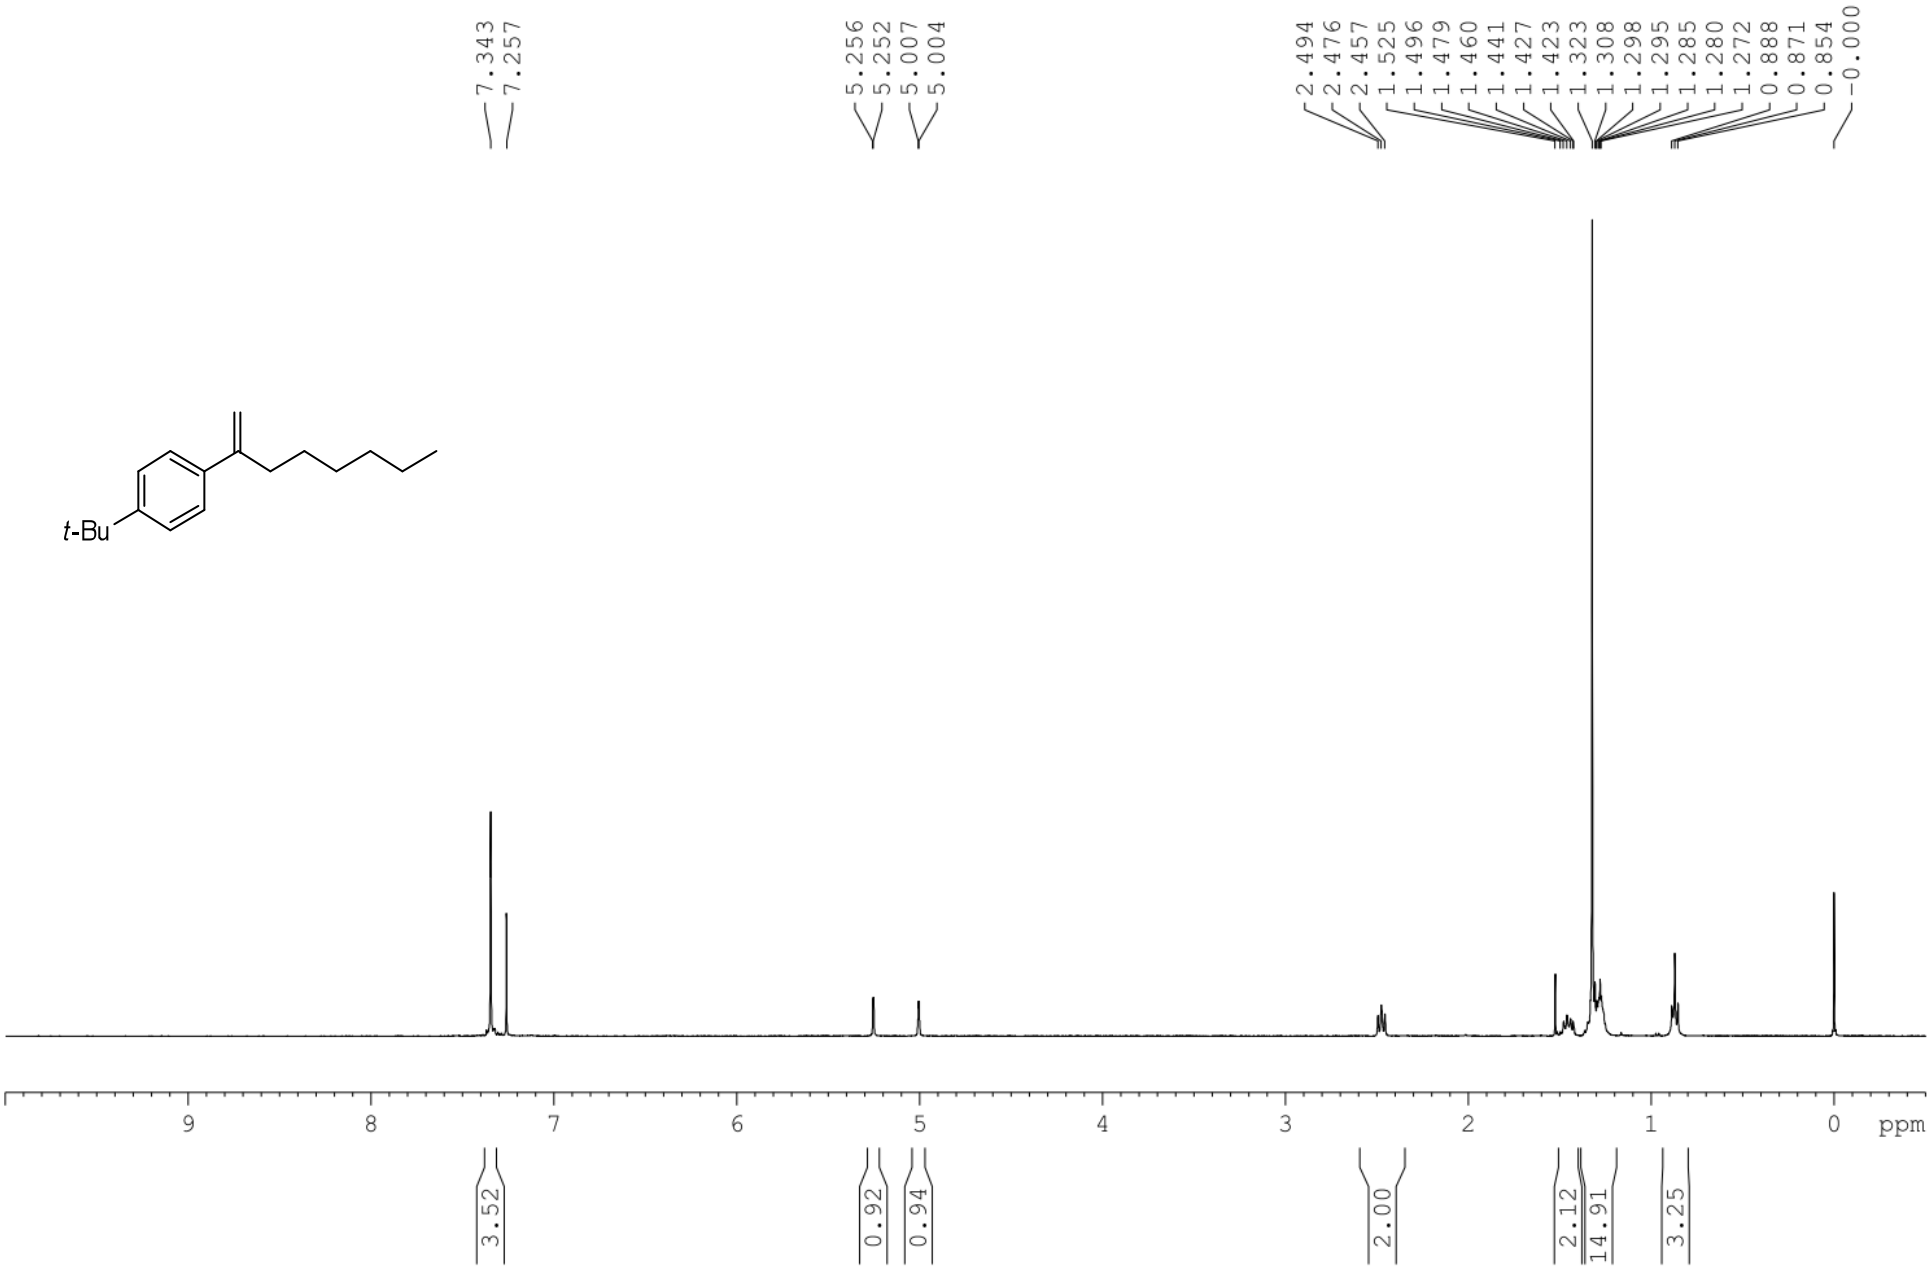

ln6117-3 H CDC13 BBFO1 2013-3-1

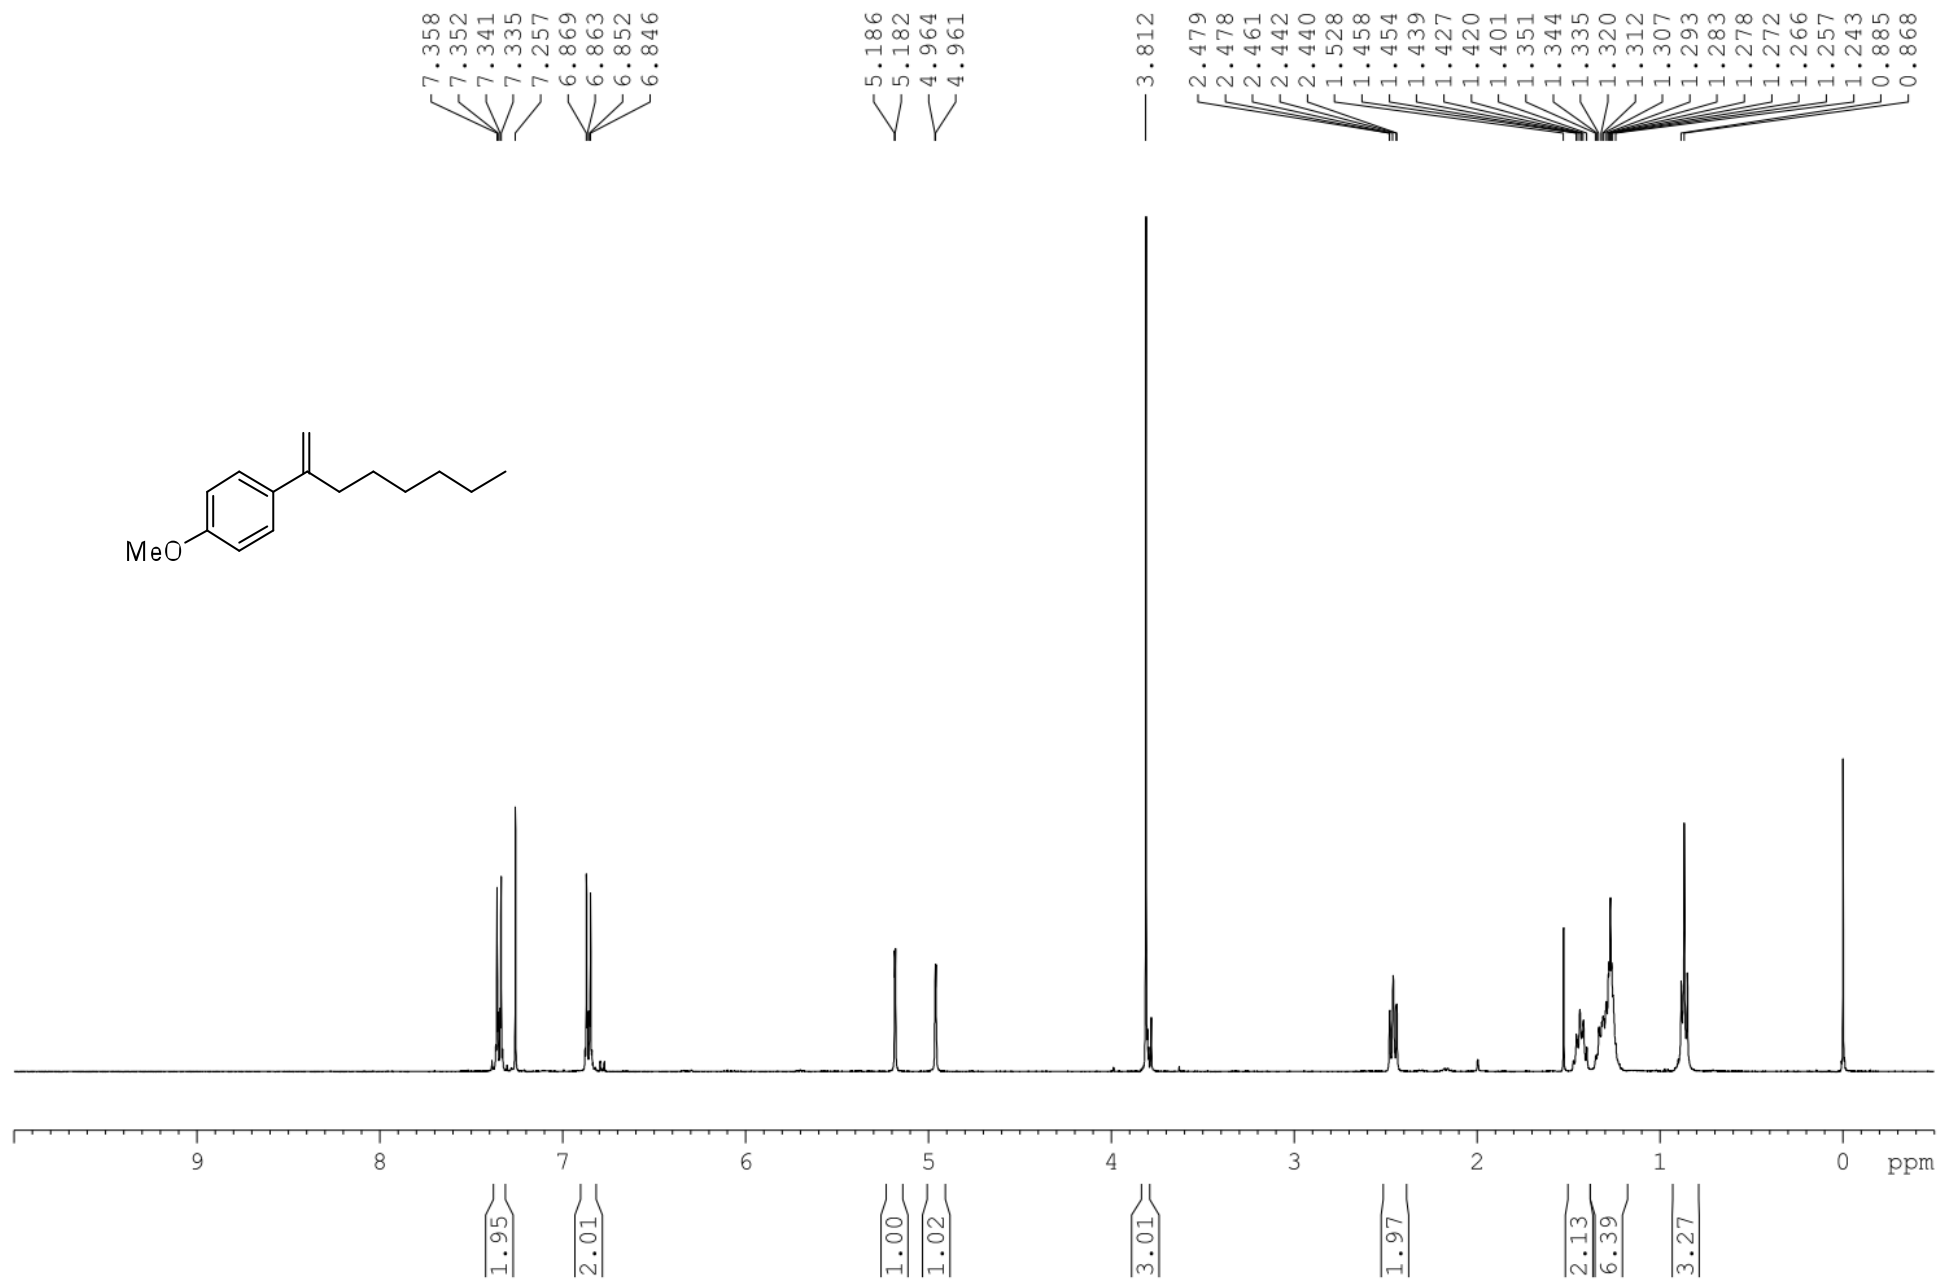



ln7006-1 H CDCl<sub>3</sub> AV400 2013-04-08

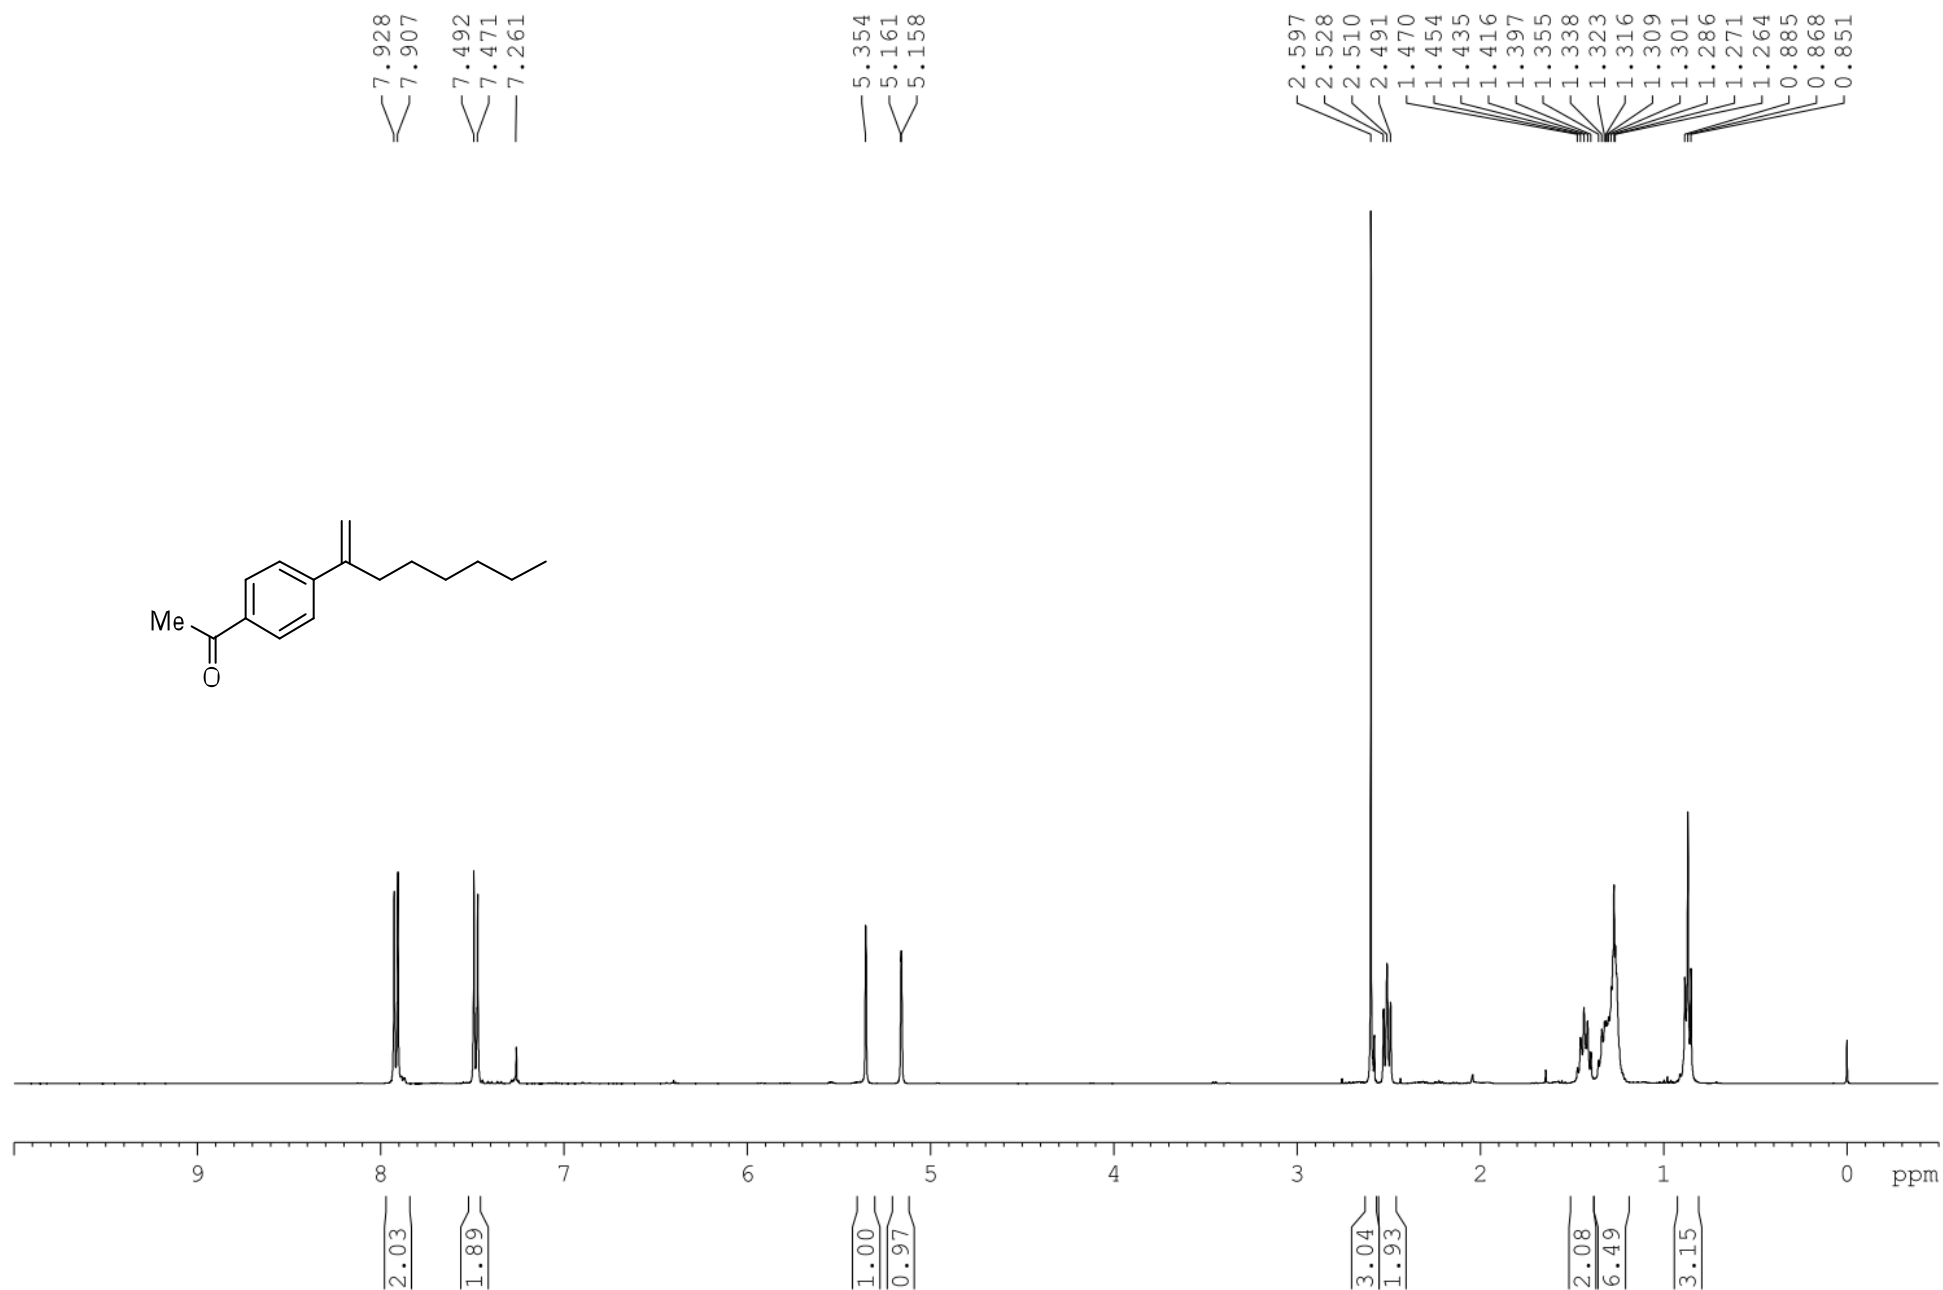

1n7004 H CDC13 AV400 2013-04-09

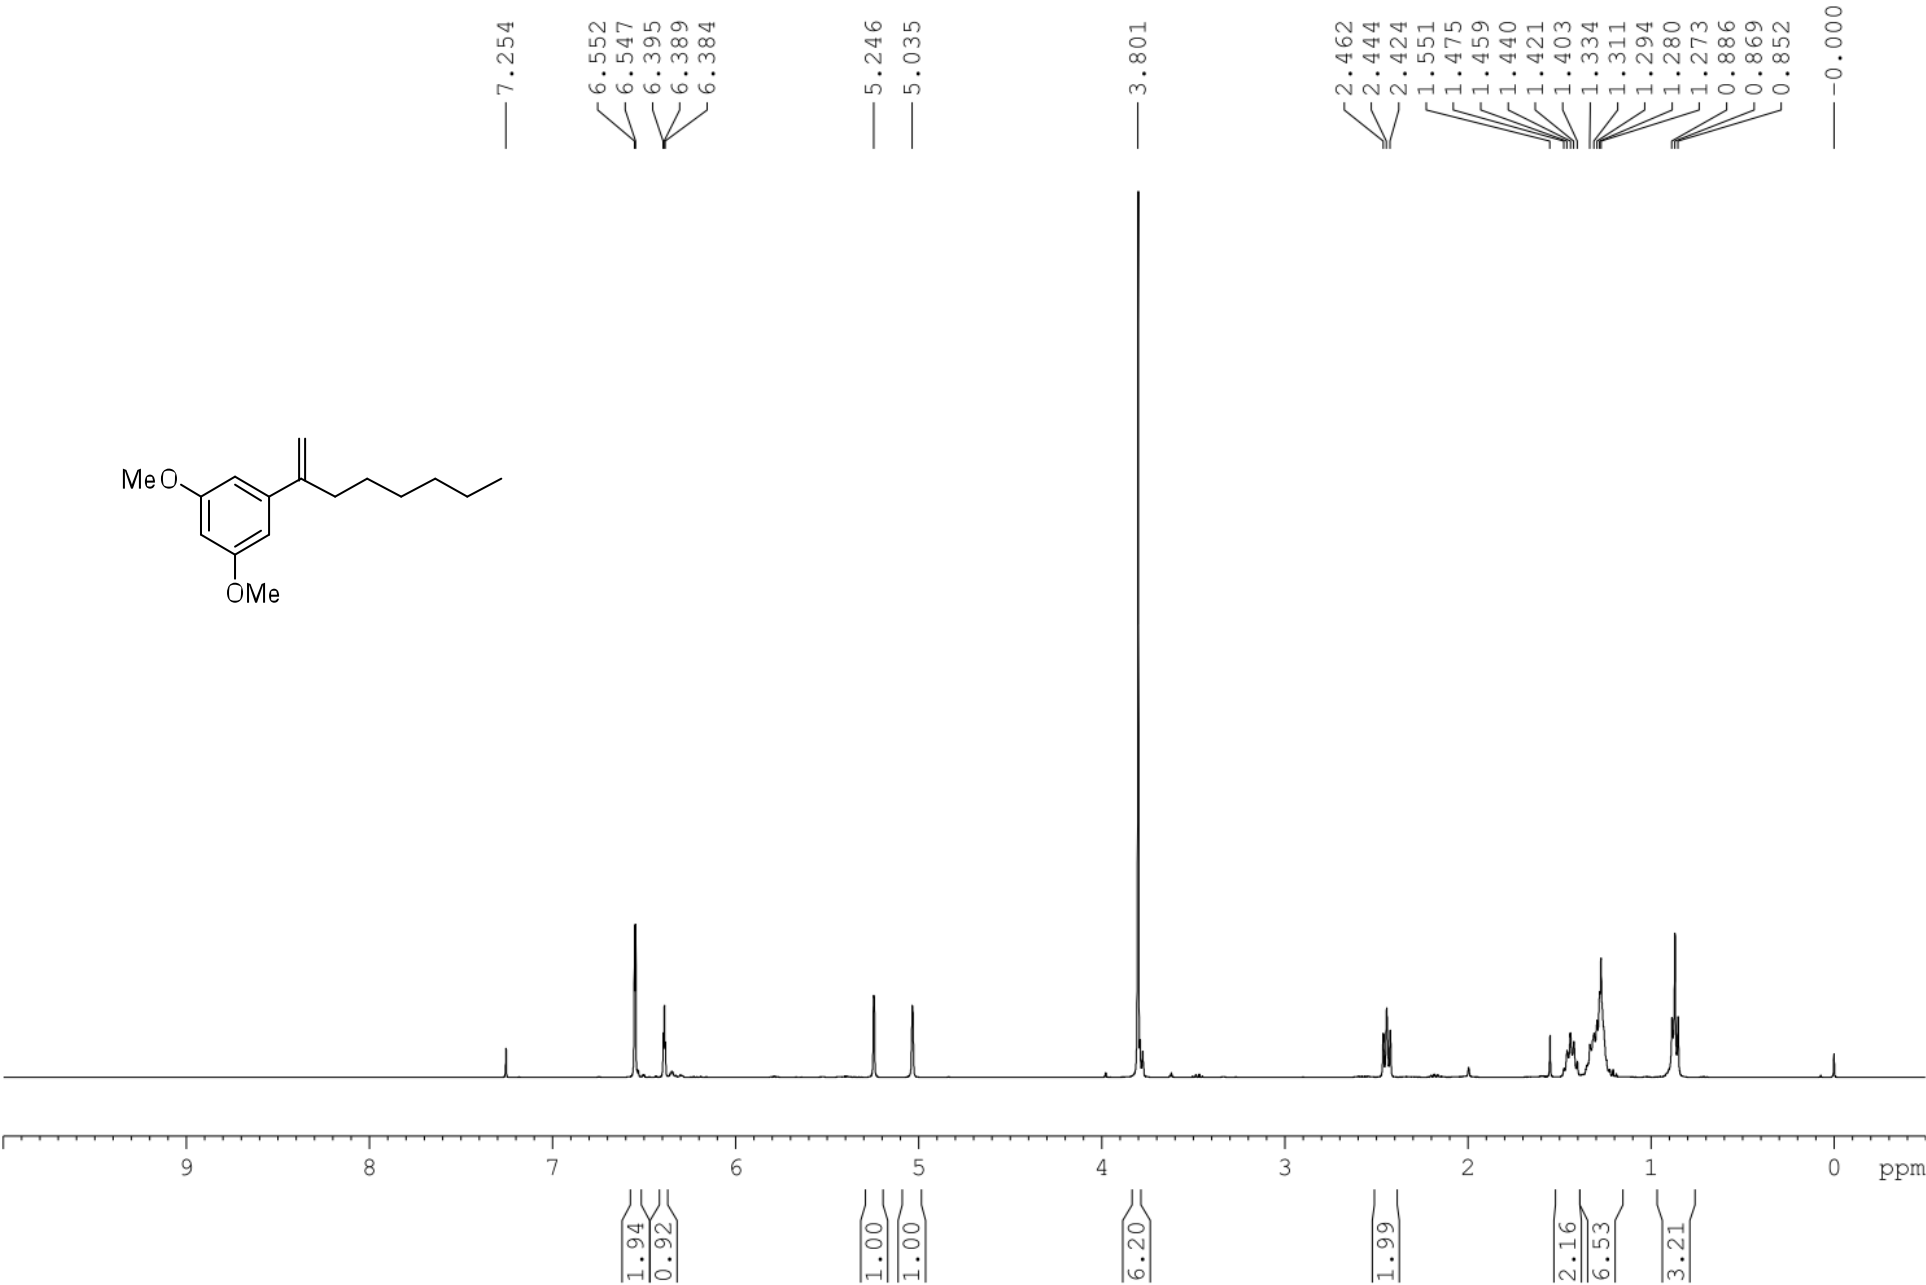

ln7006-2 H CDC13 AV400 2013-04-08

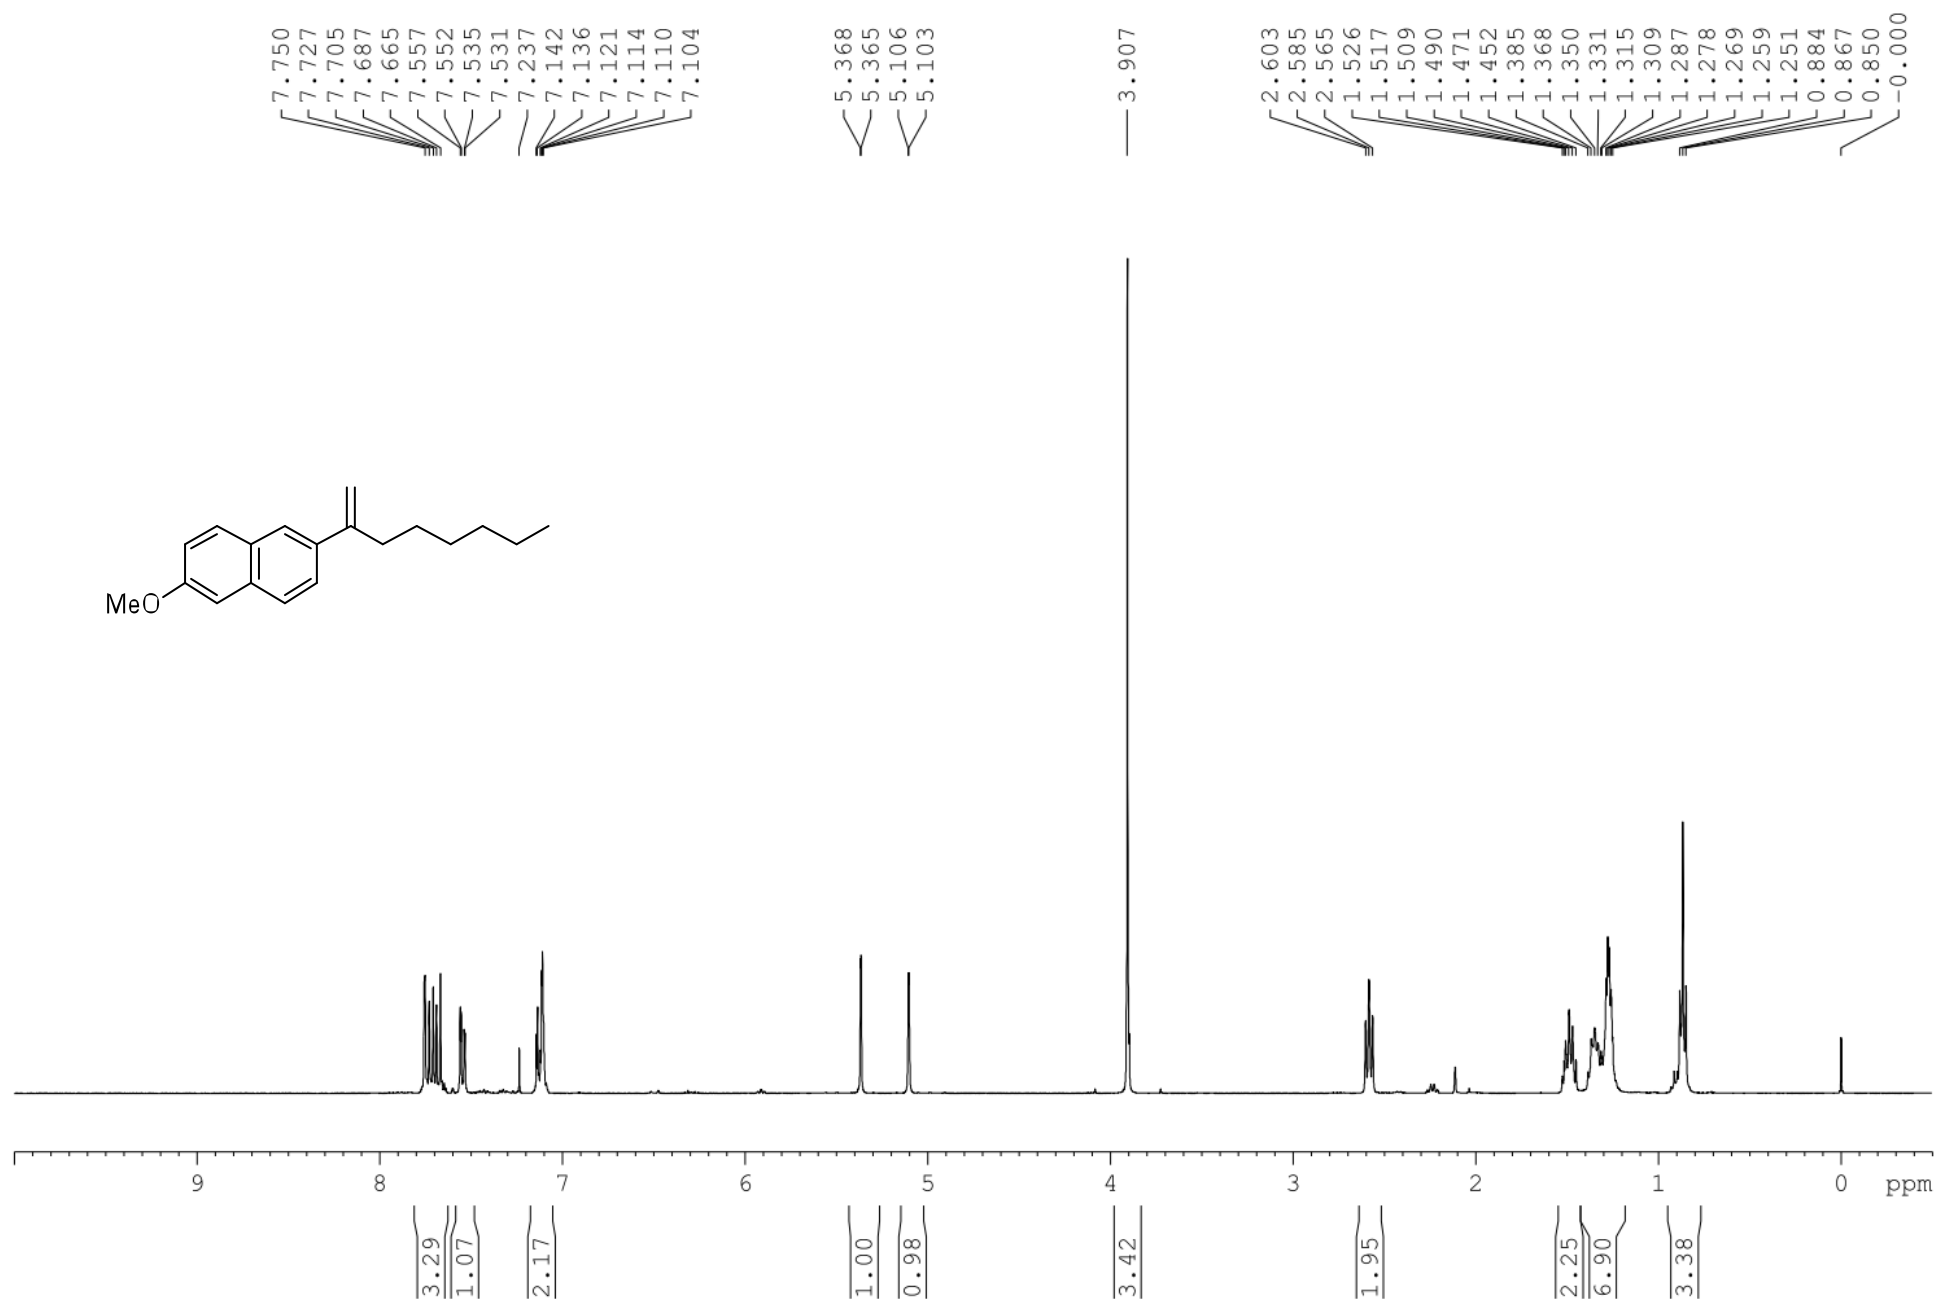

ln7006-2 C CDC13 AV400 2013-04-08

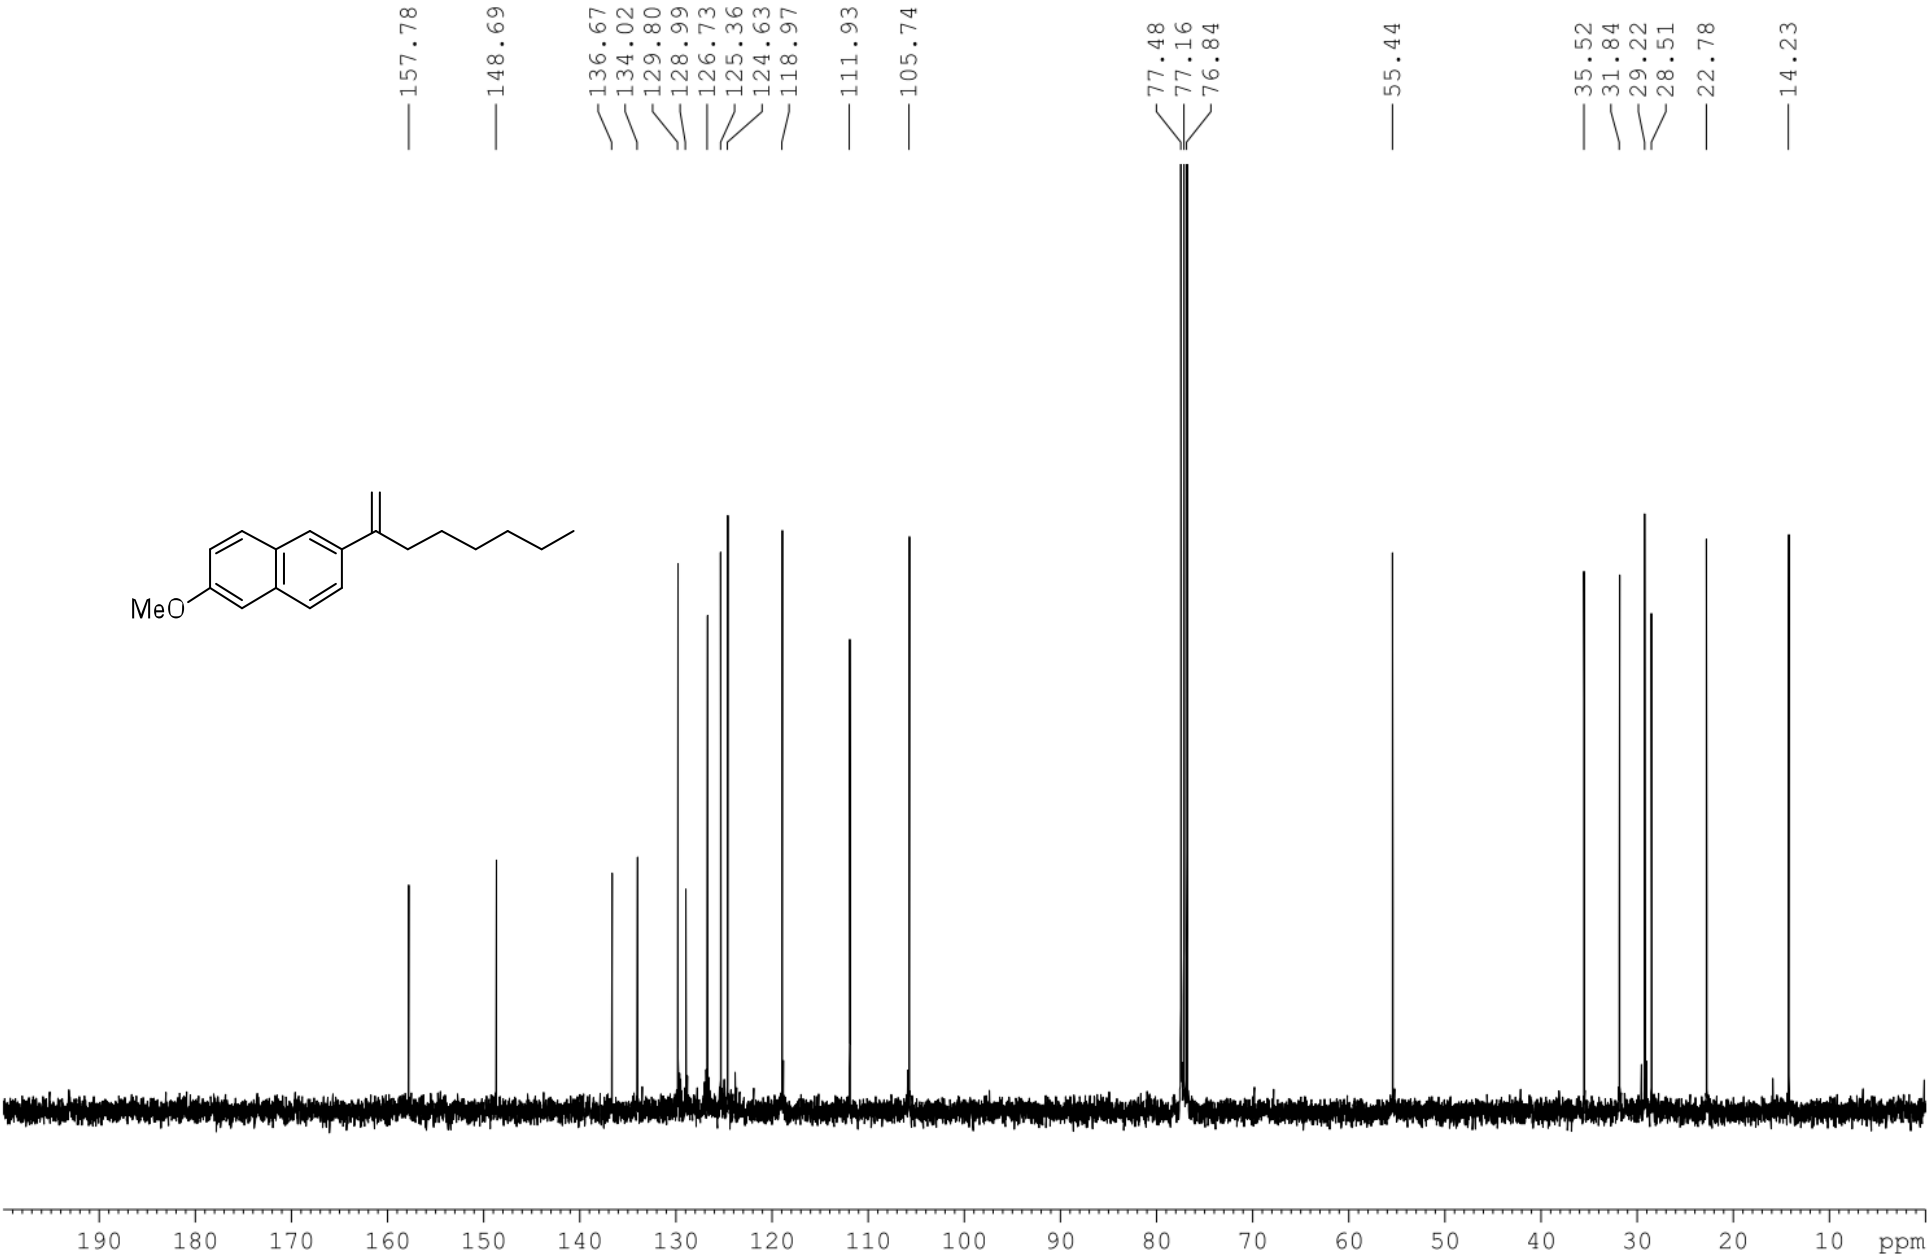

1n7052 H CDC13 AV400 3013-05-13

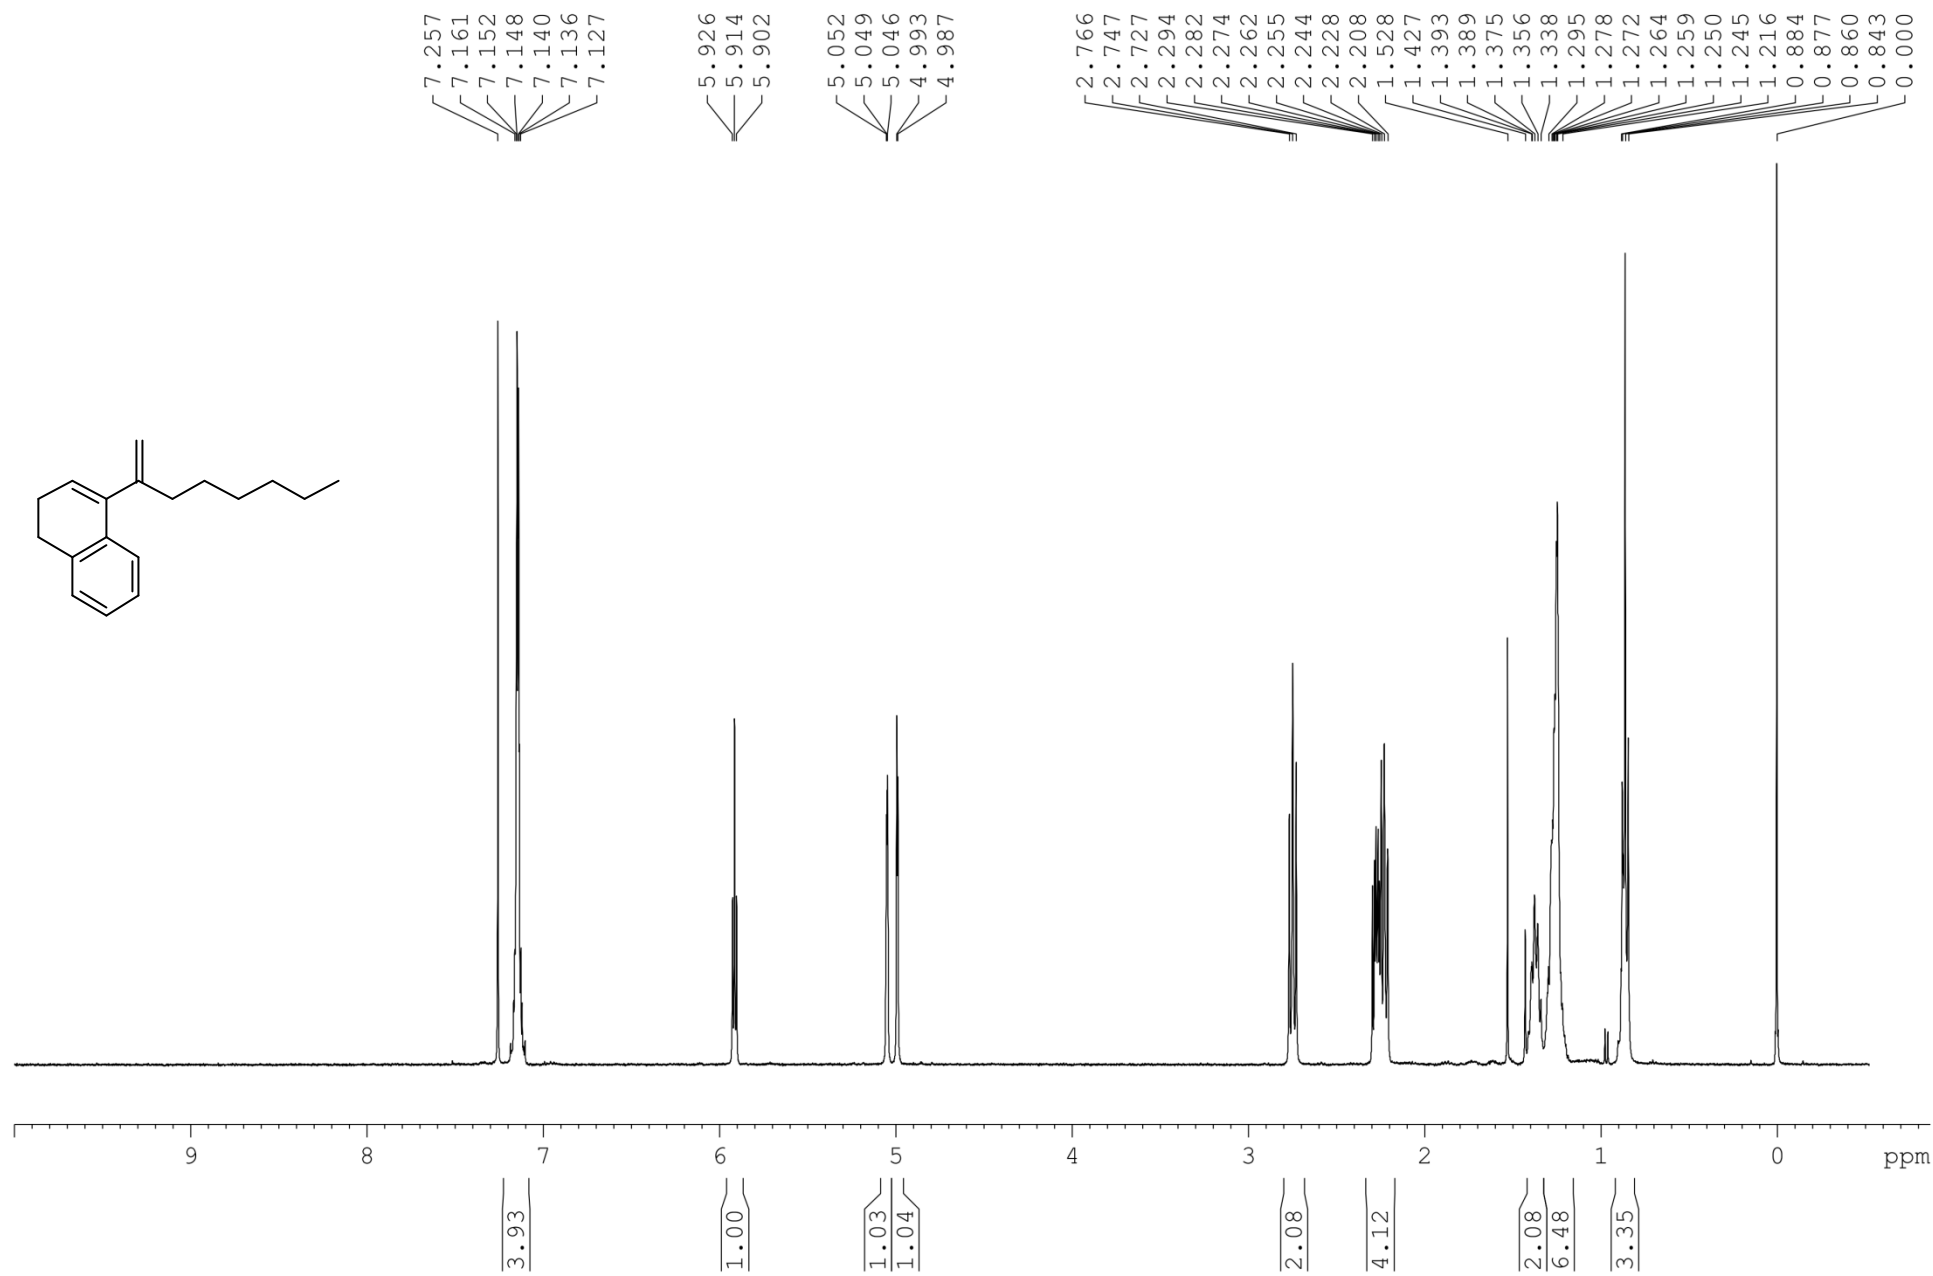

LN7015-2 H CDC13 BBFO1 2013-04-15

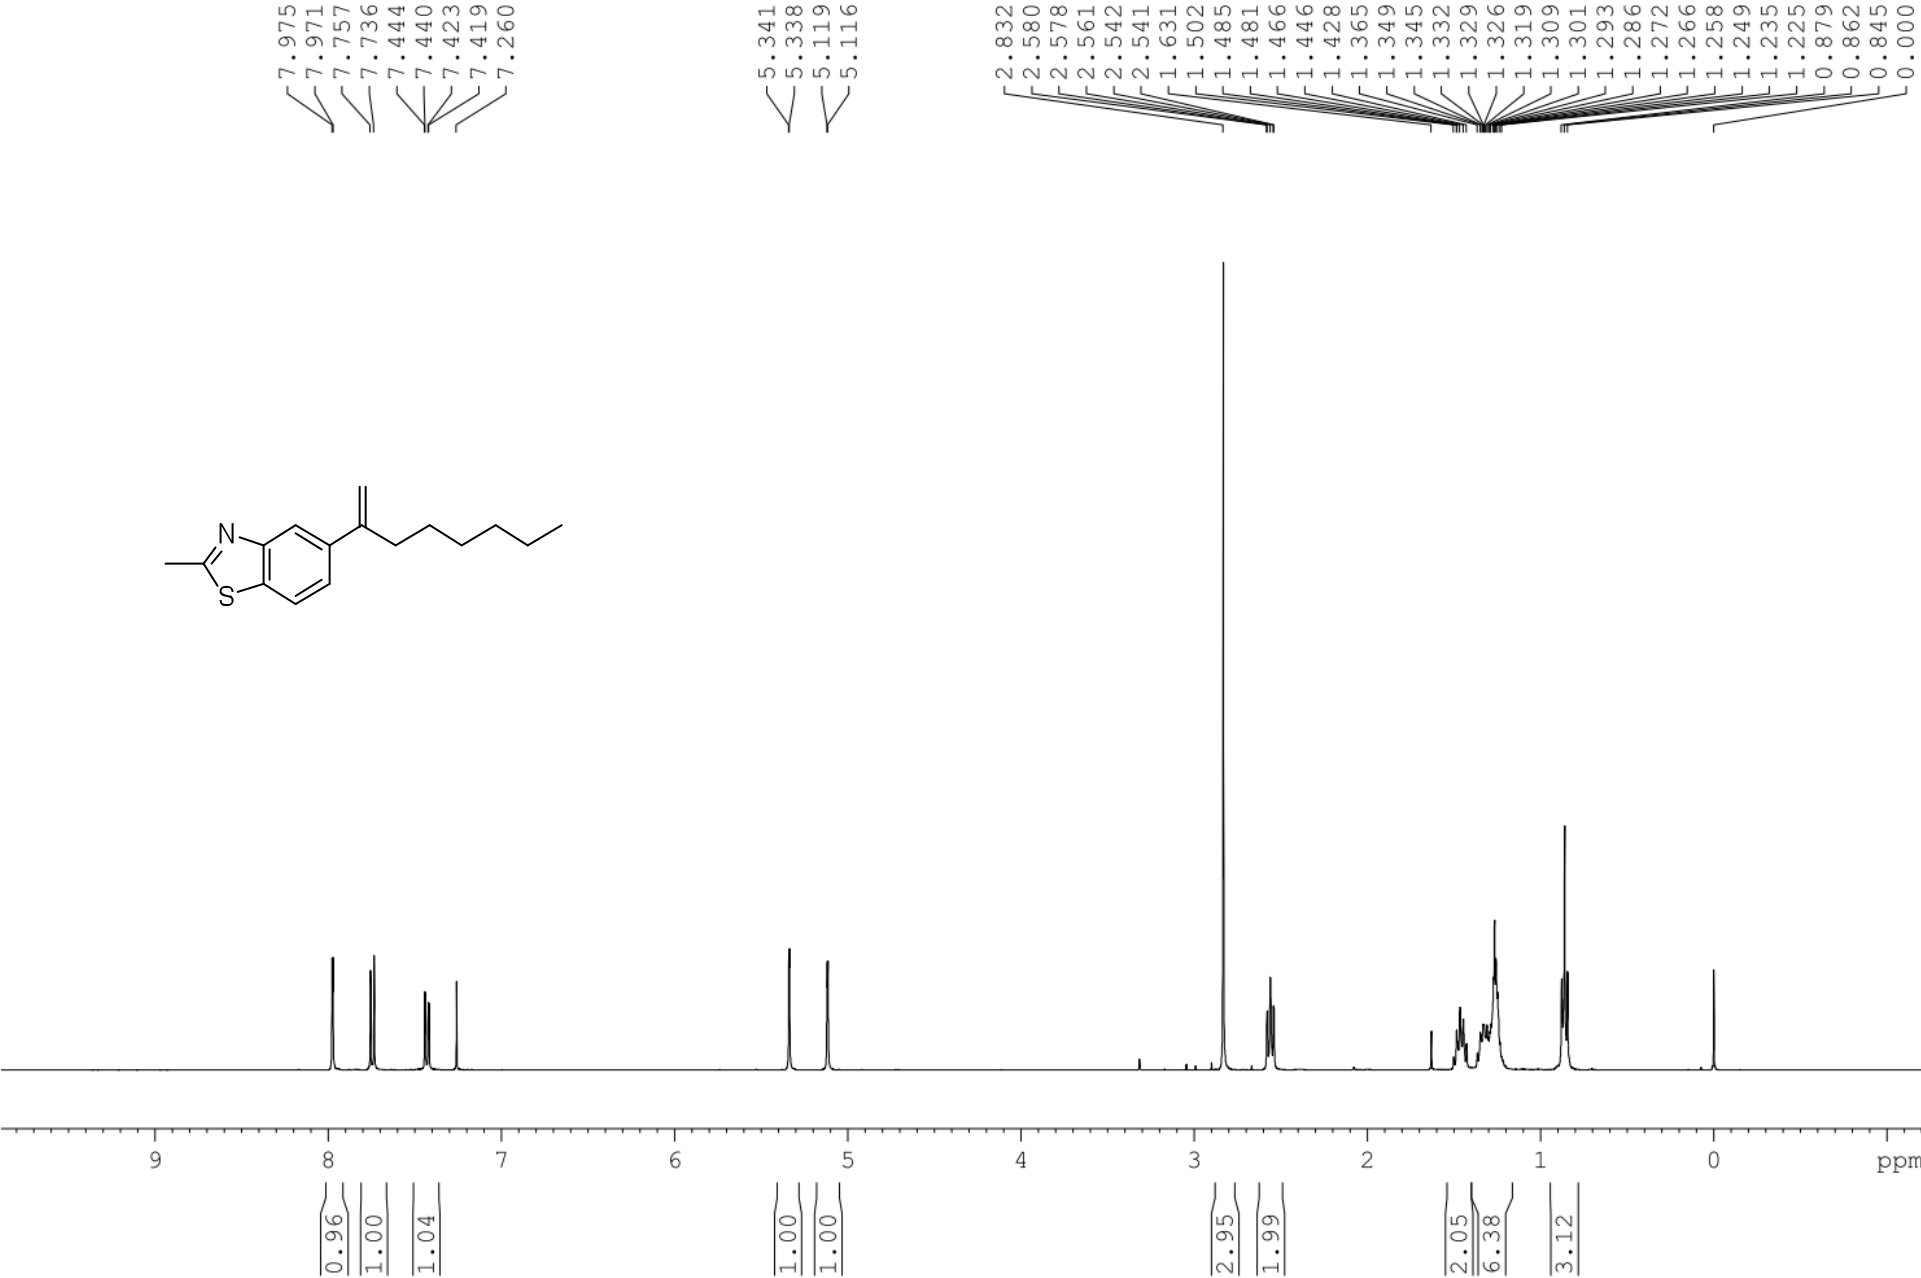

LN7015-2 C CDC13 BBFO1 2013-04-15

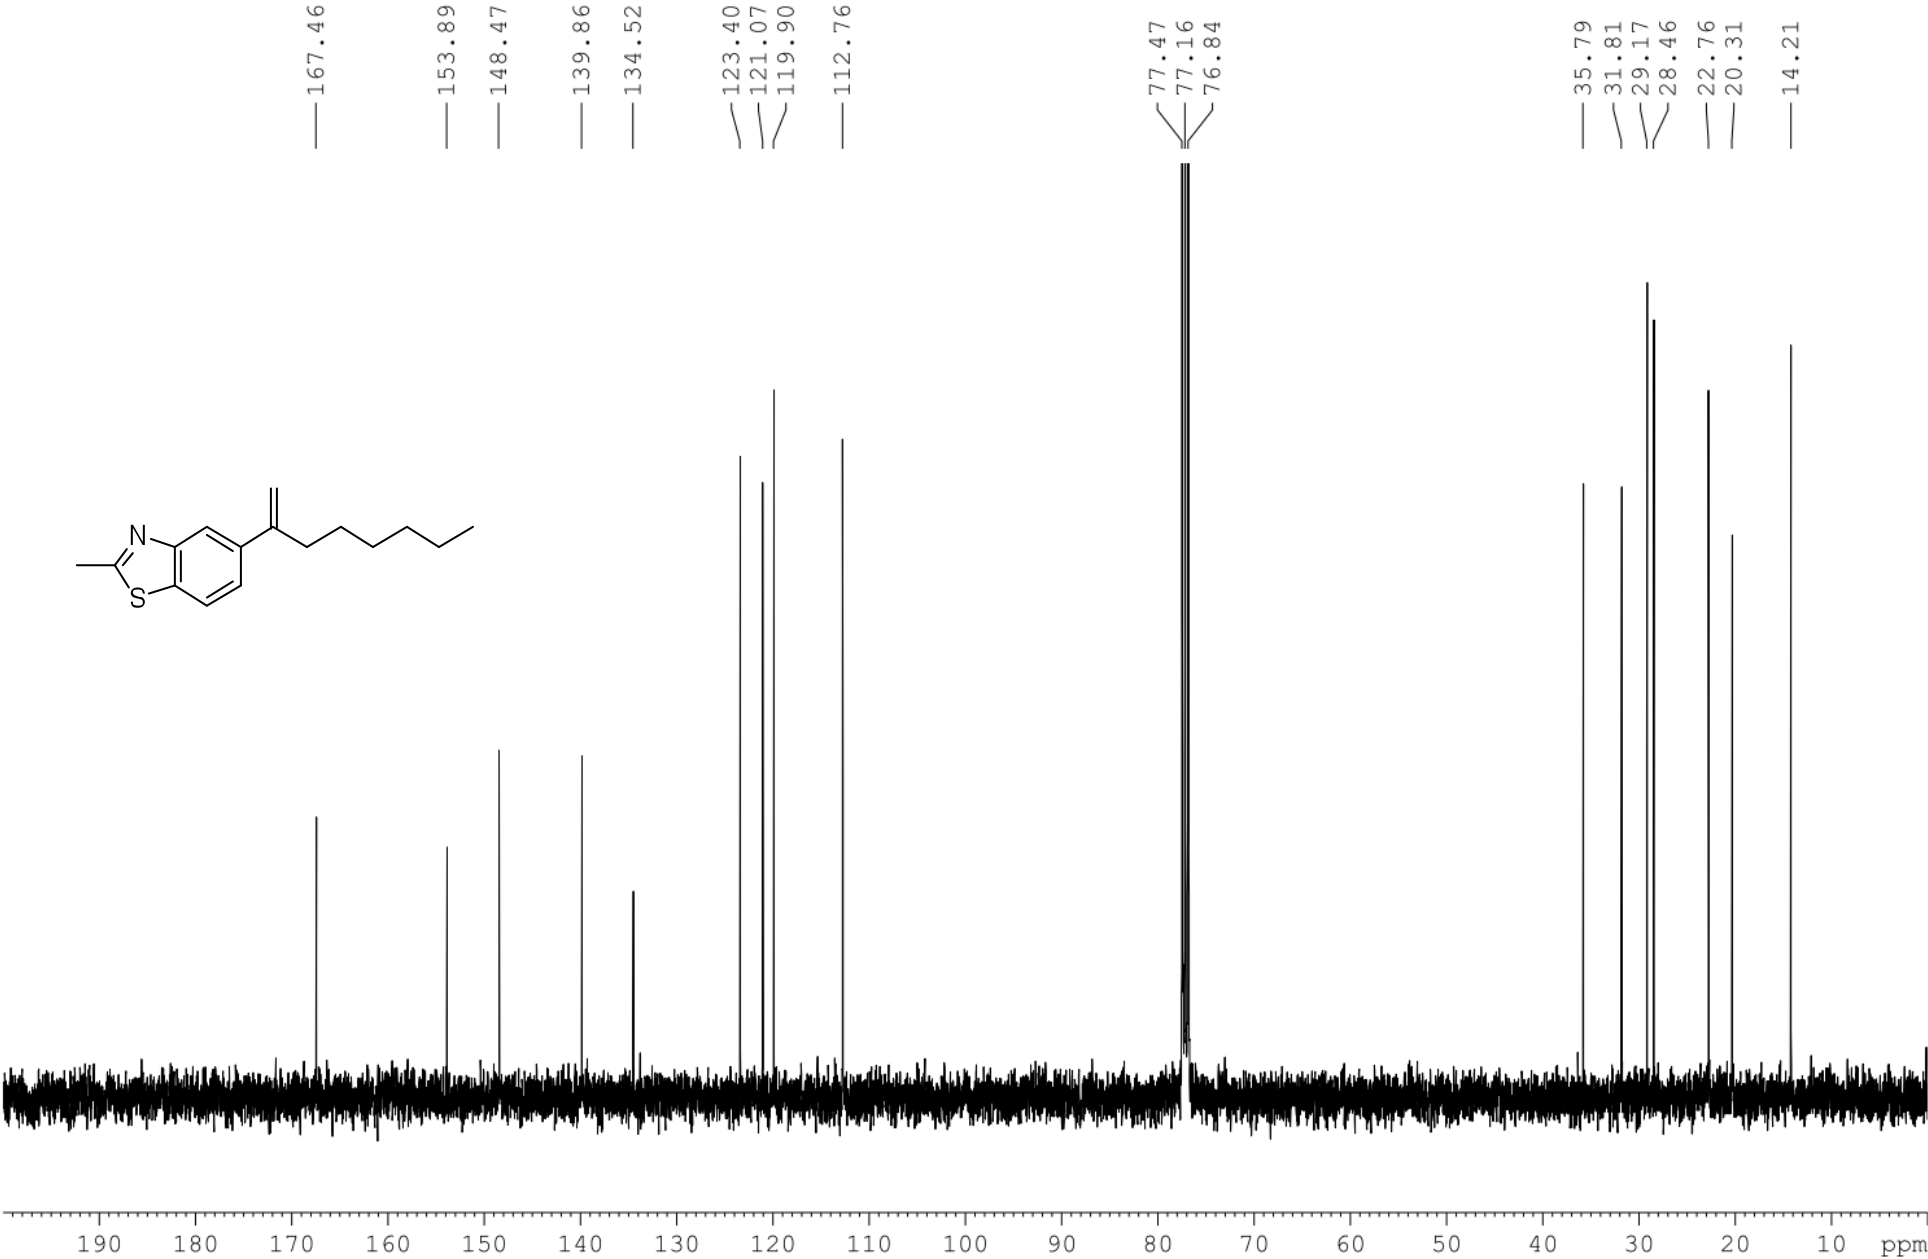

ln7076 H CDC13 AV400 02013-06-17

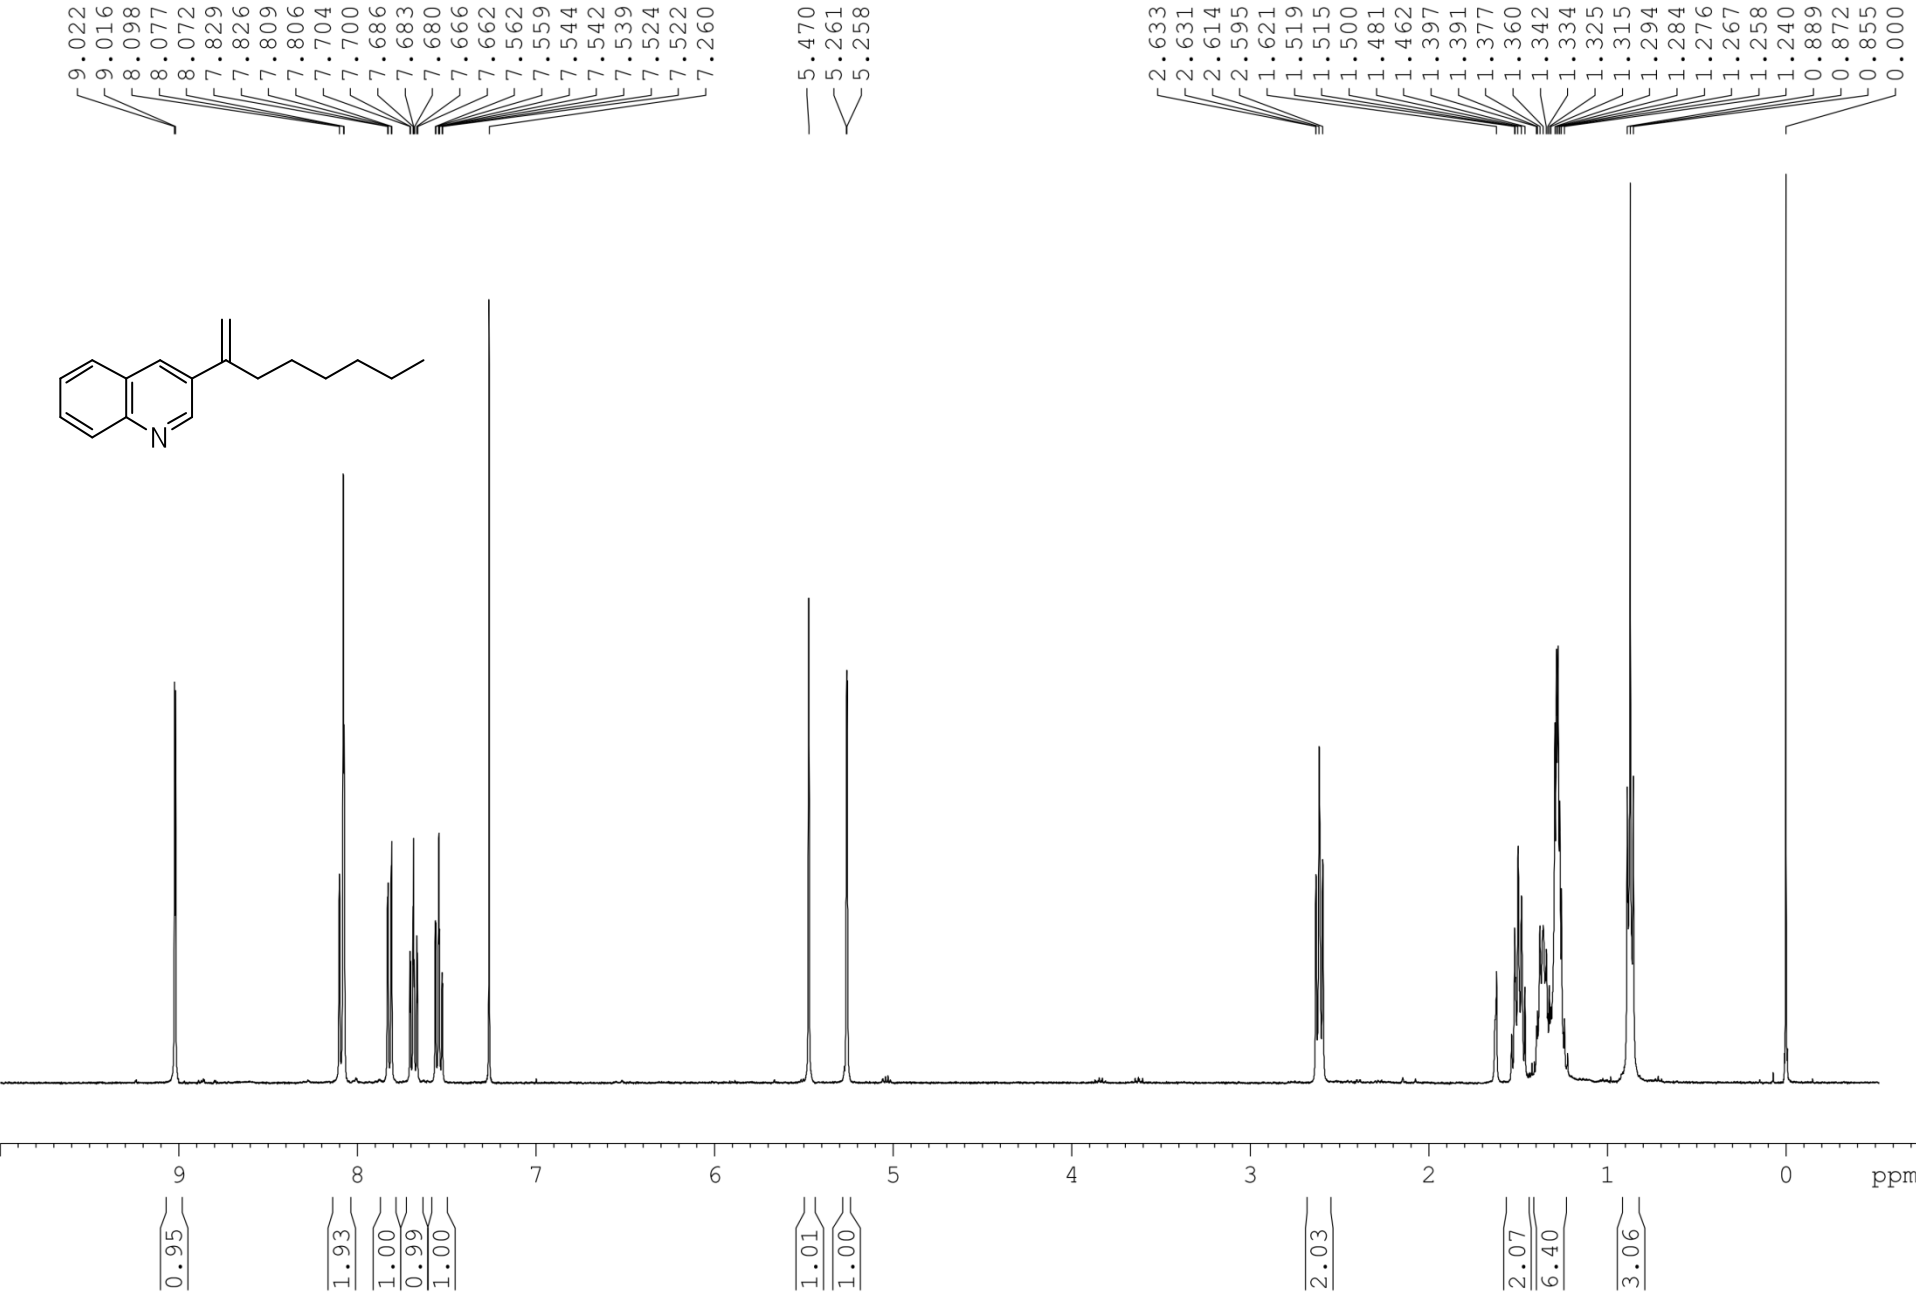



ln7073 C CDC13 BBFO1 2013-06-09

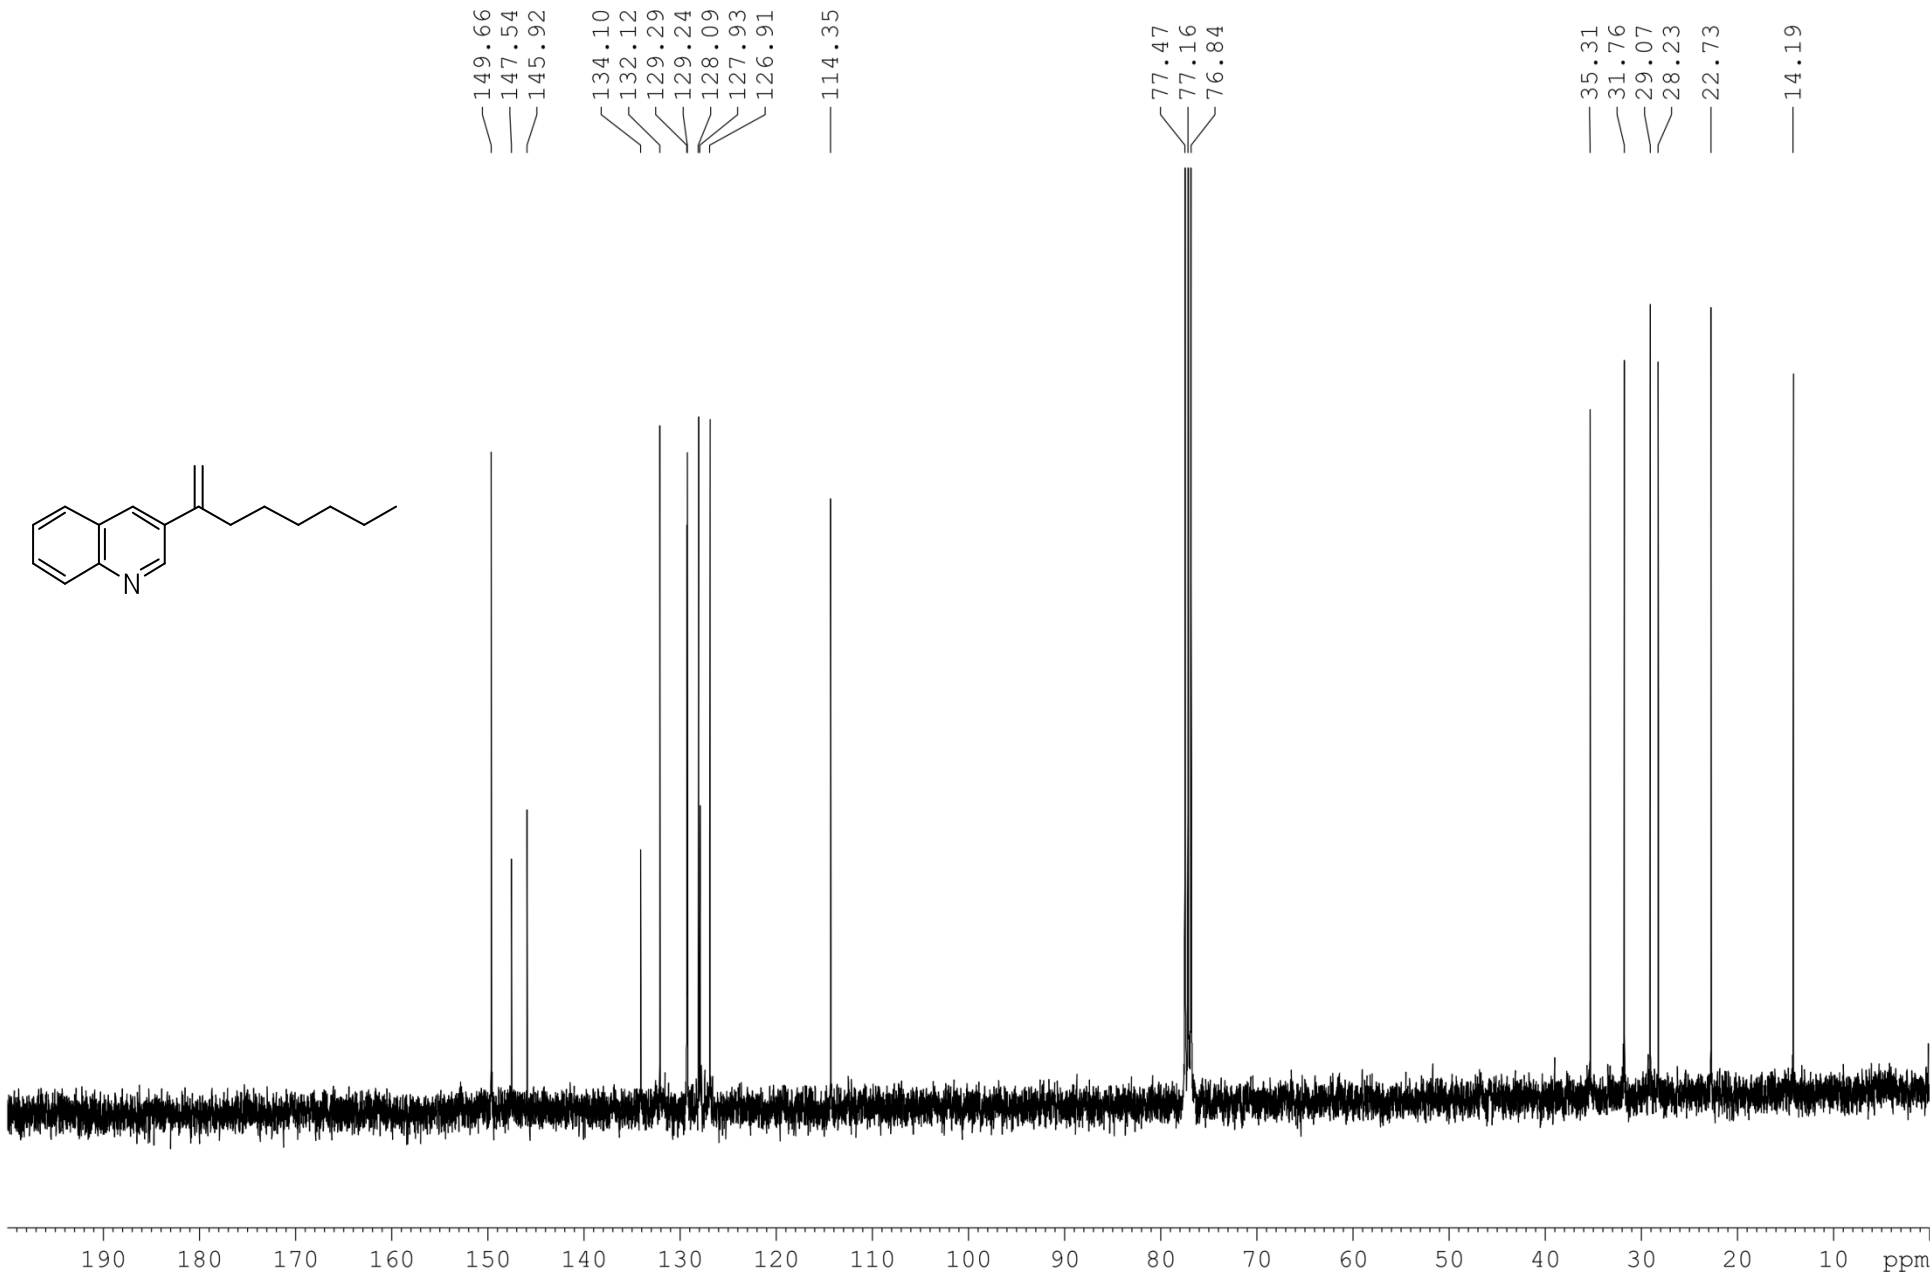

1n7074 H CDC13 BBFO1 2013-06-09

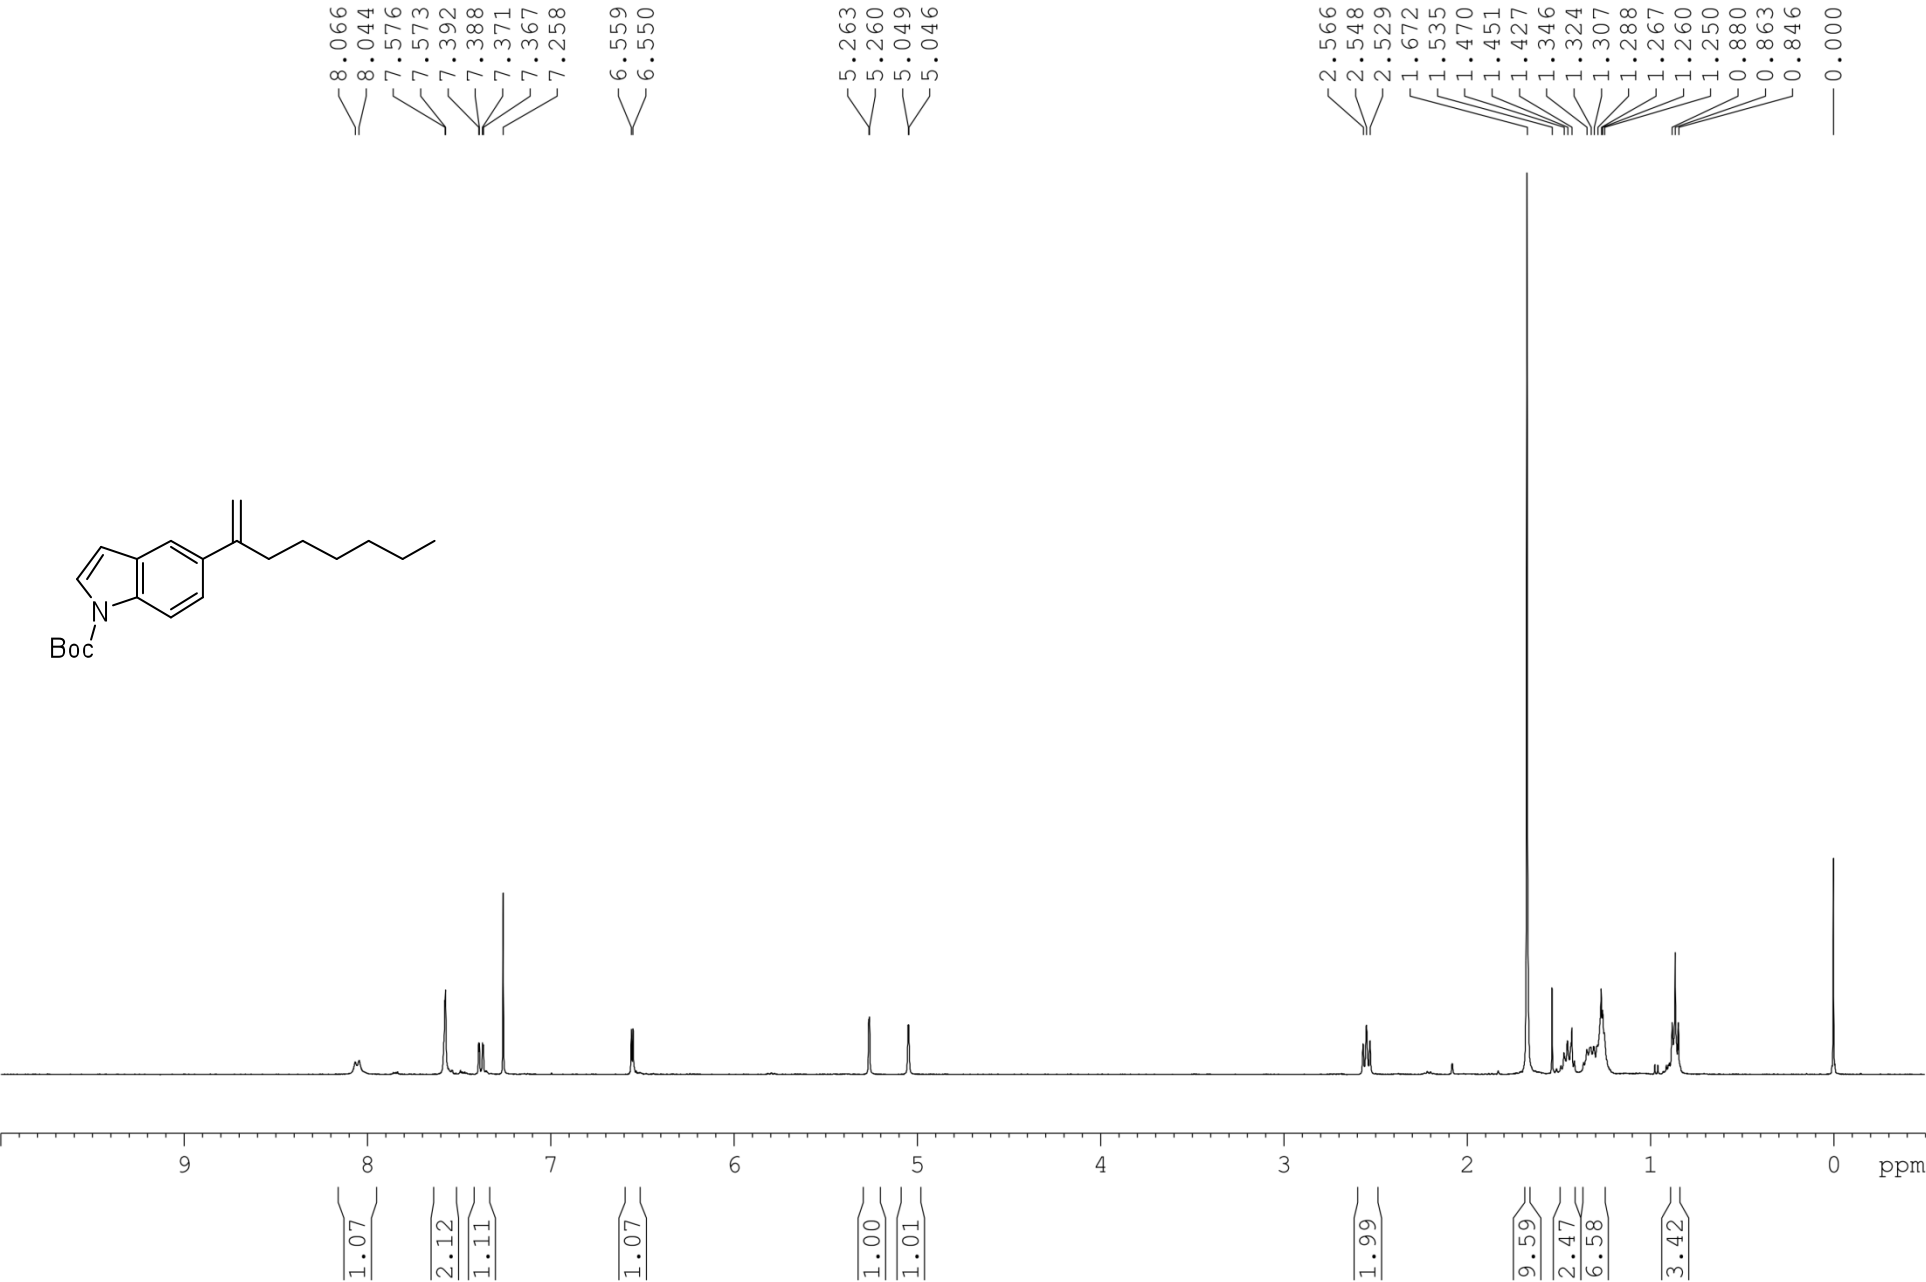

LN6127-3 H CDC13 2013-3-10

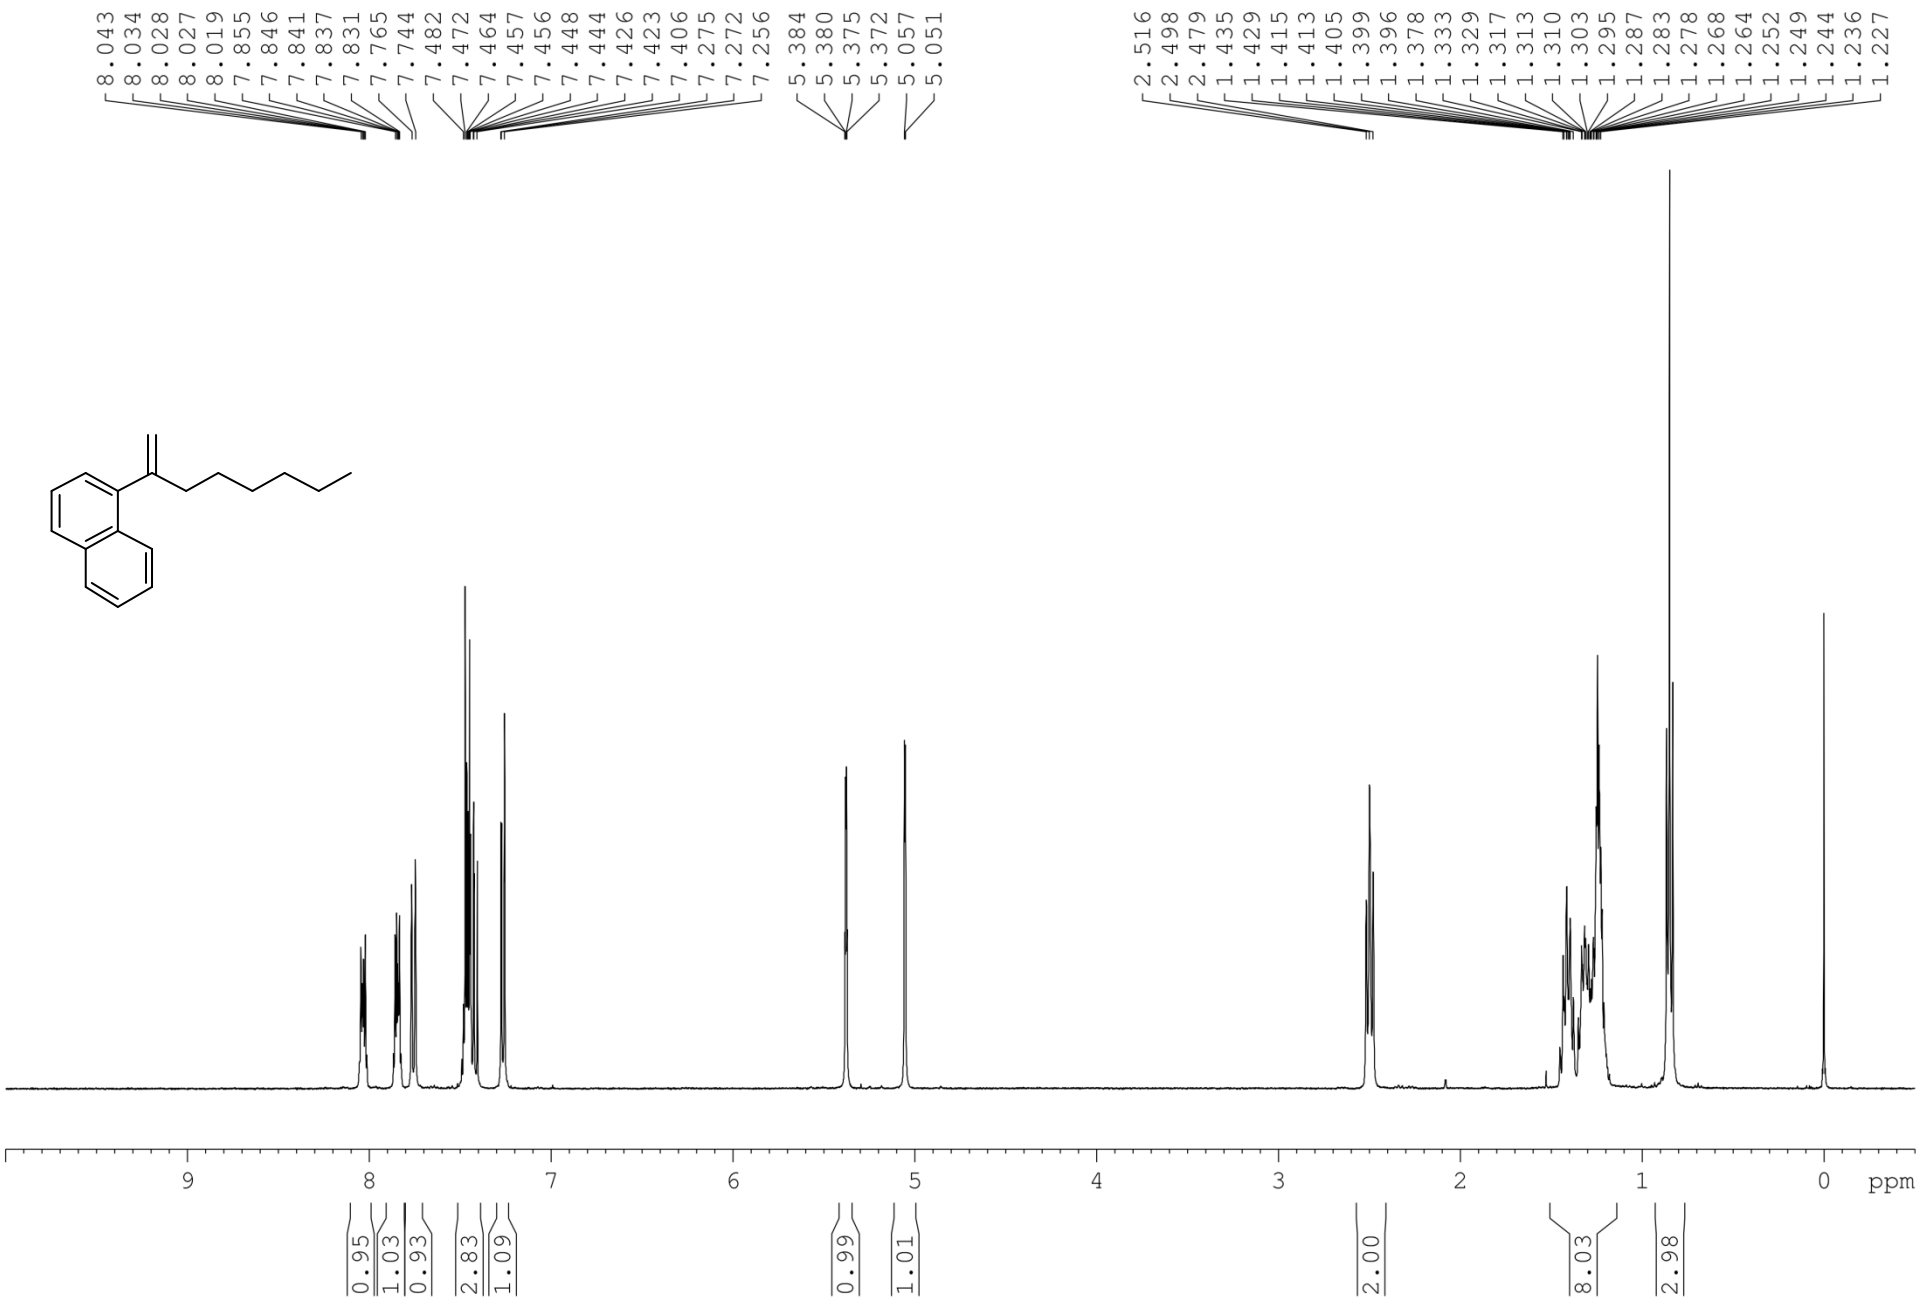

CCCCC(=O)C(C)C(=C)c1ccccc1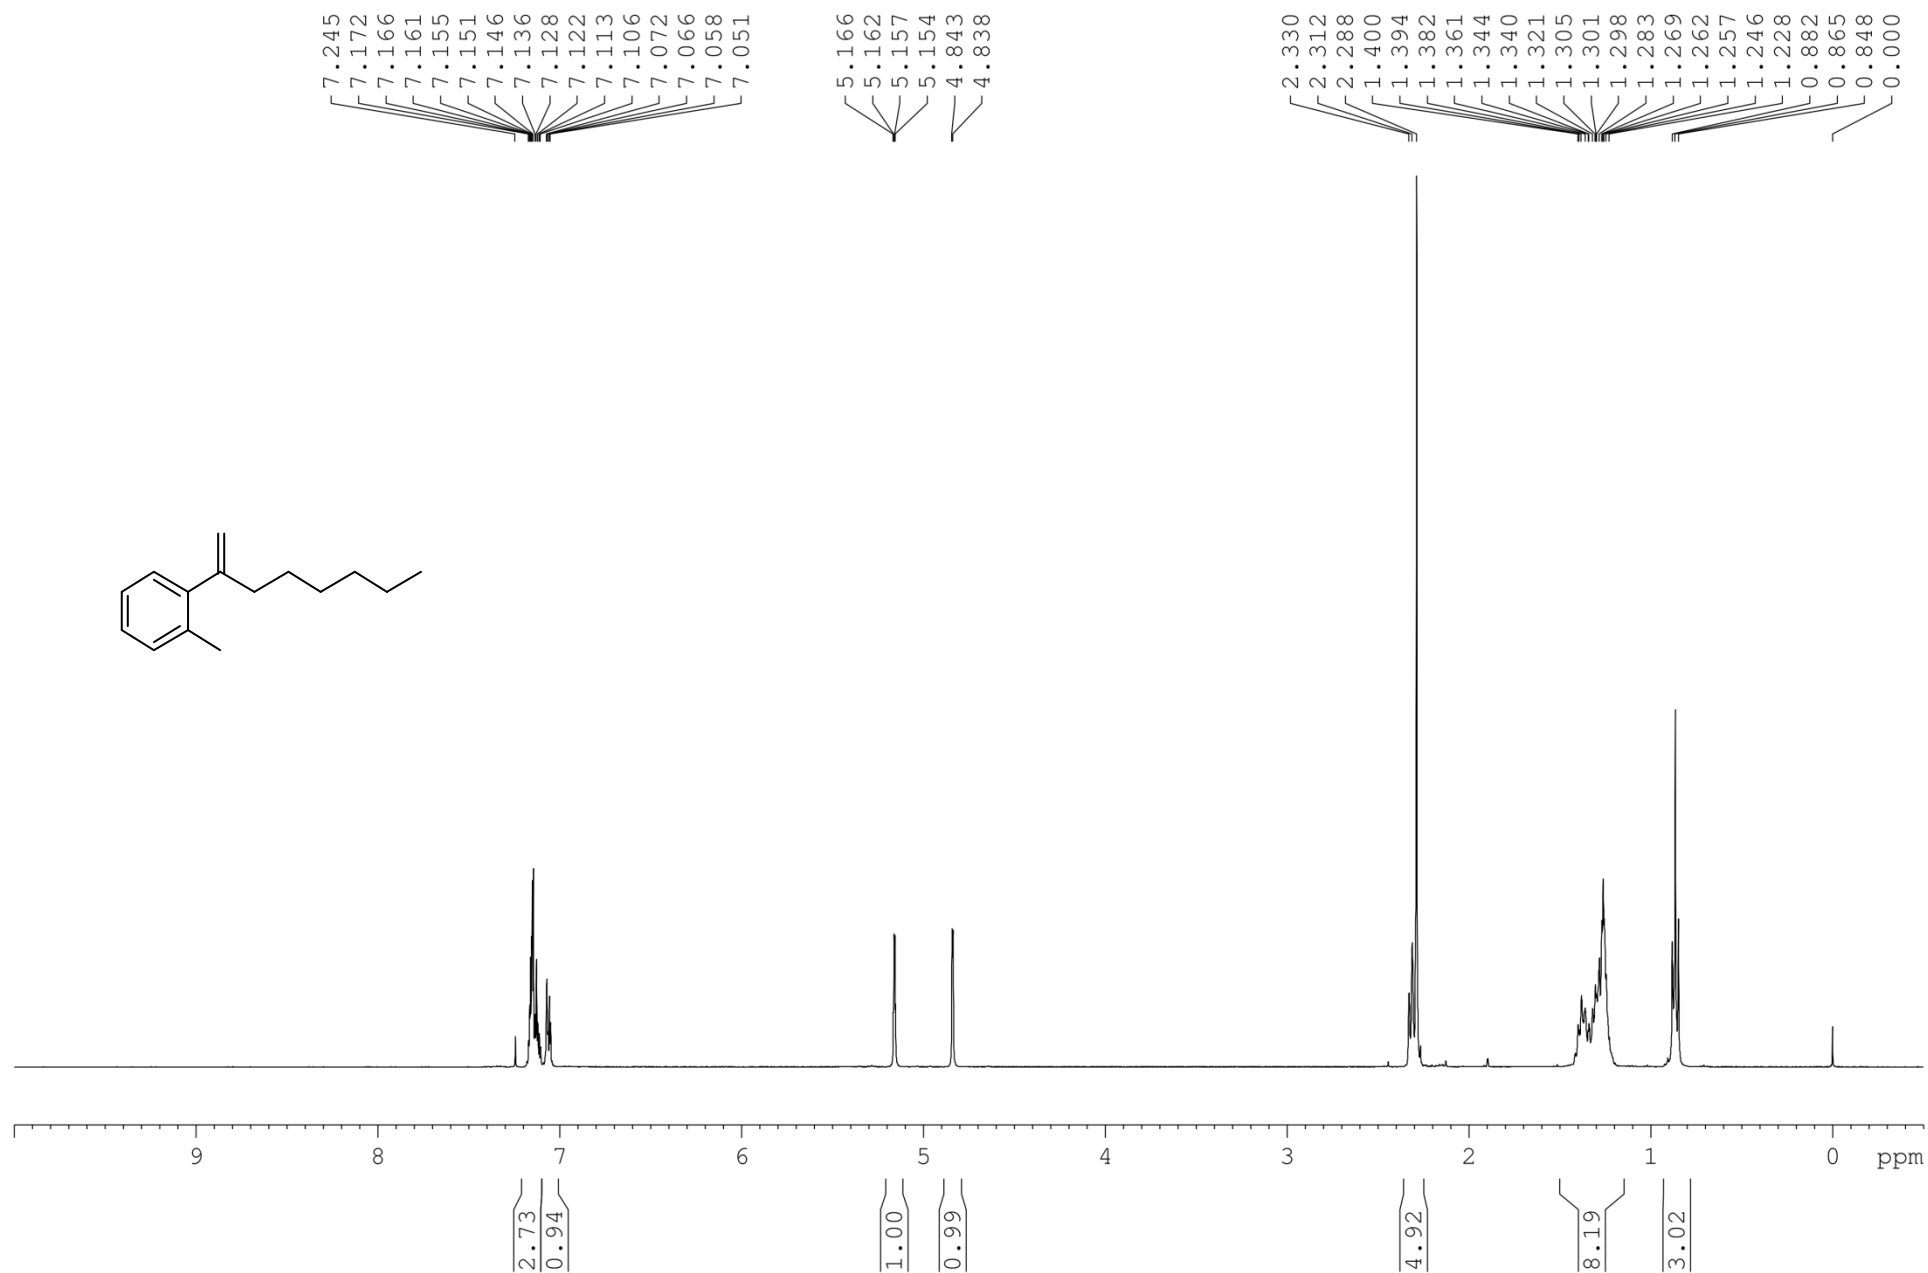

ln6117-4 H CDCl3 BBFO1 2013-3-1

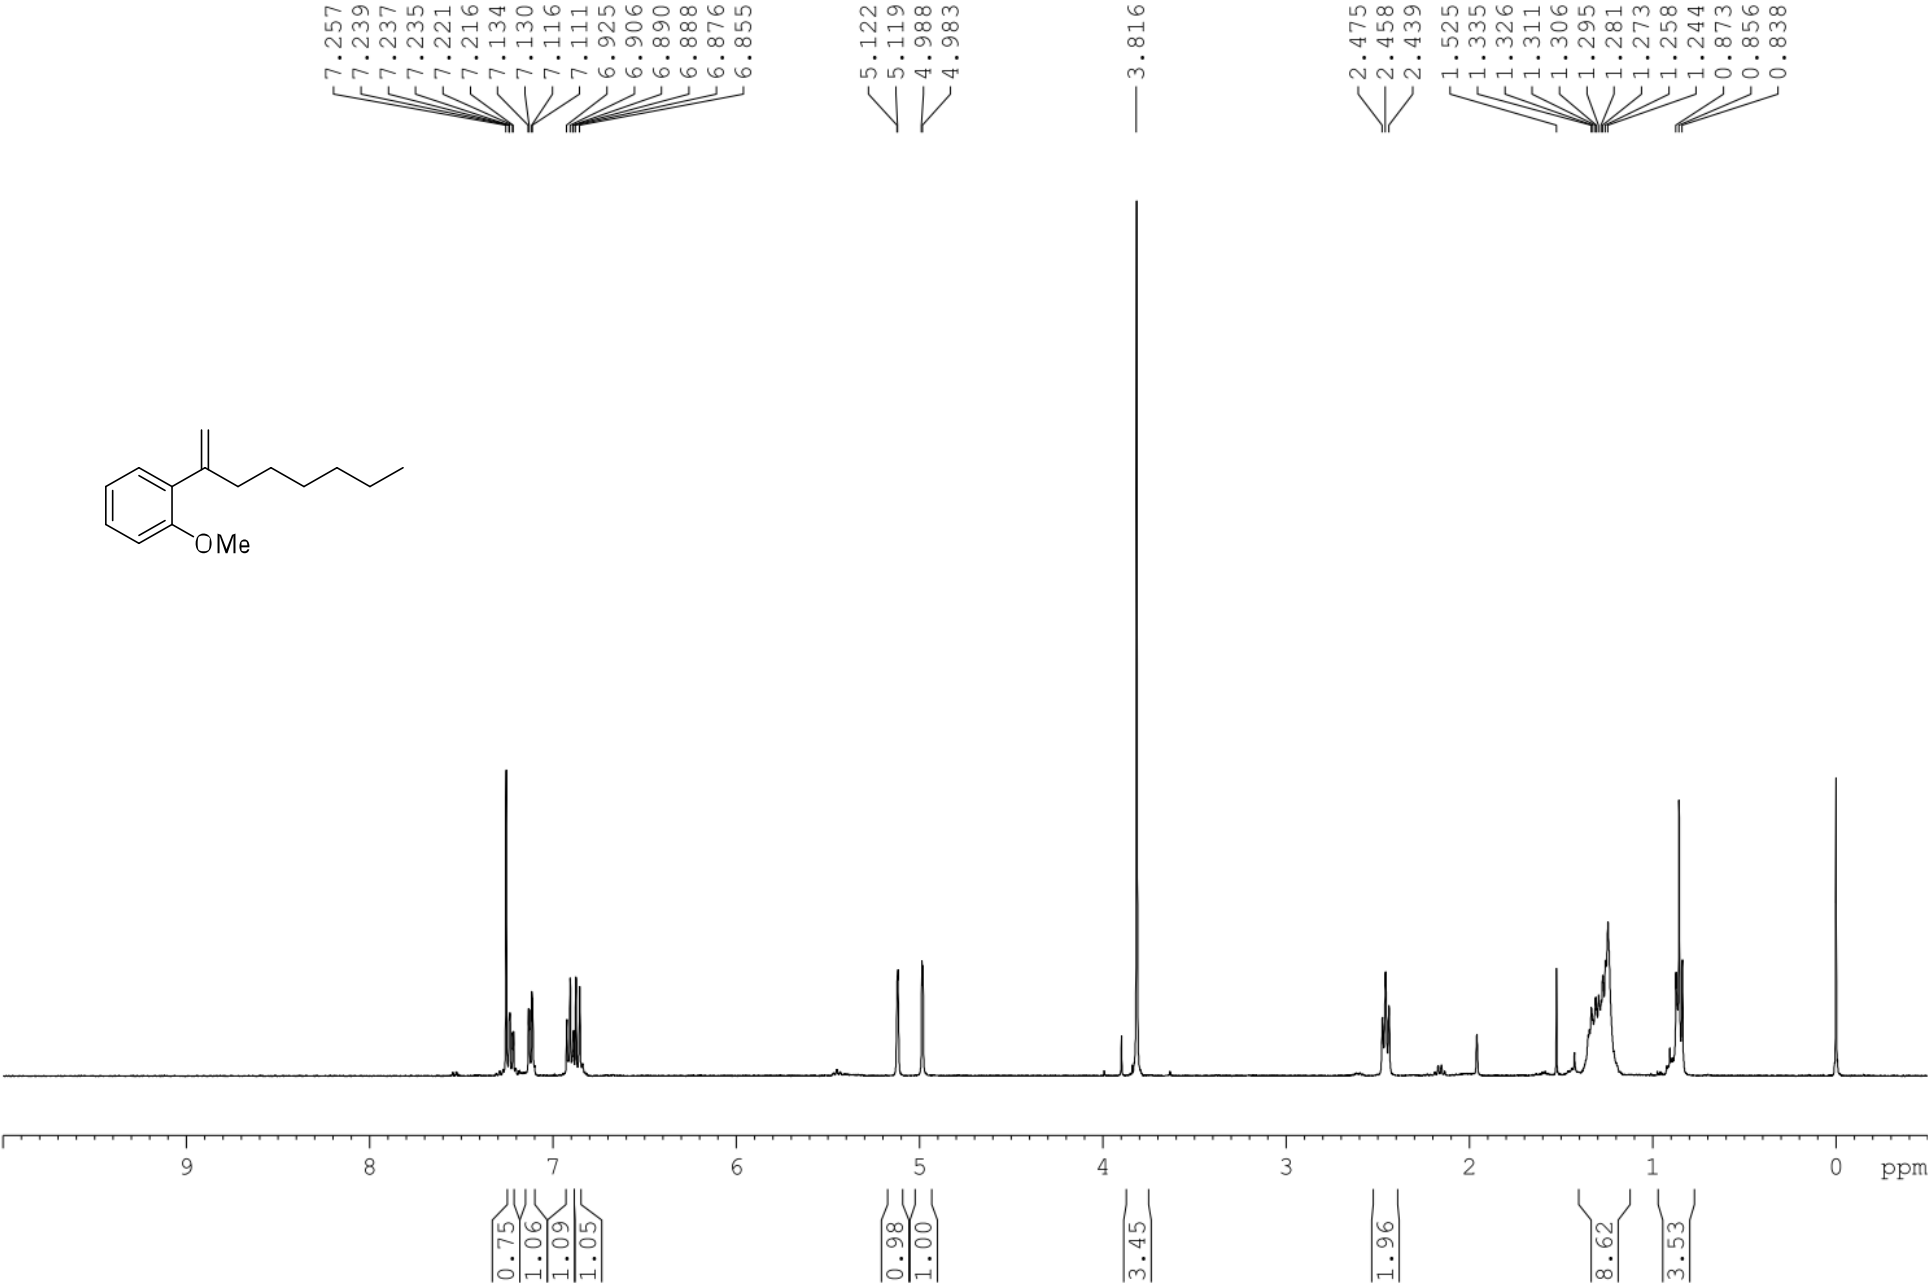

ln6117-5 H CDCl3 BBFO1 2013-3-7

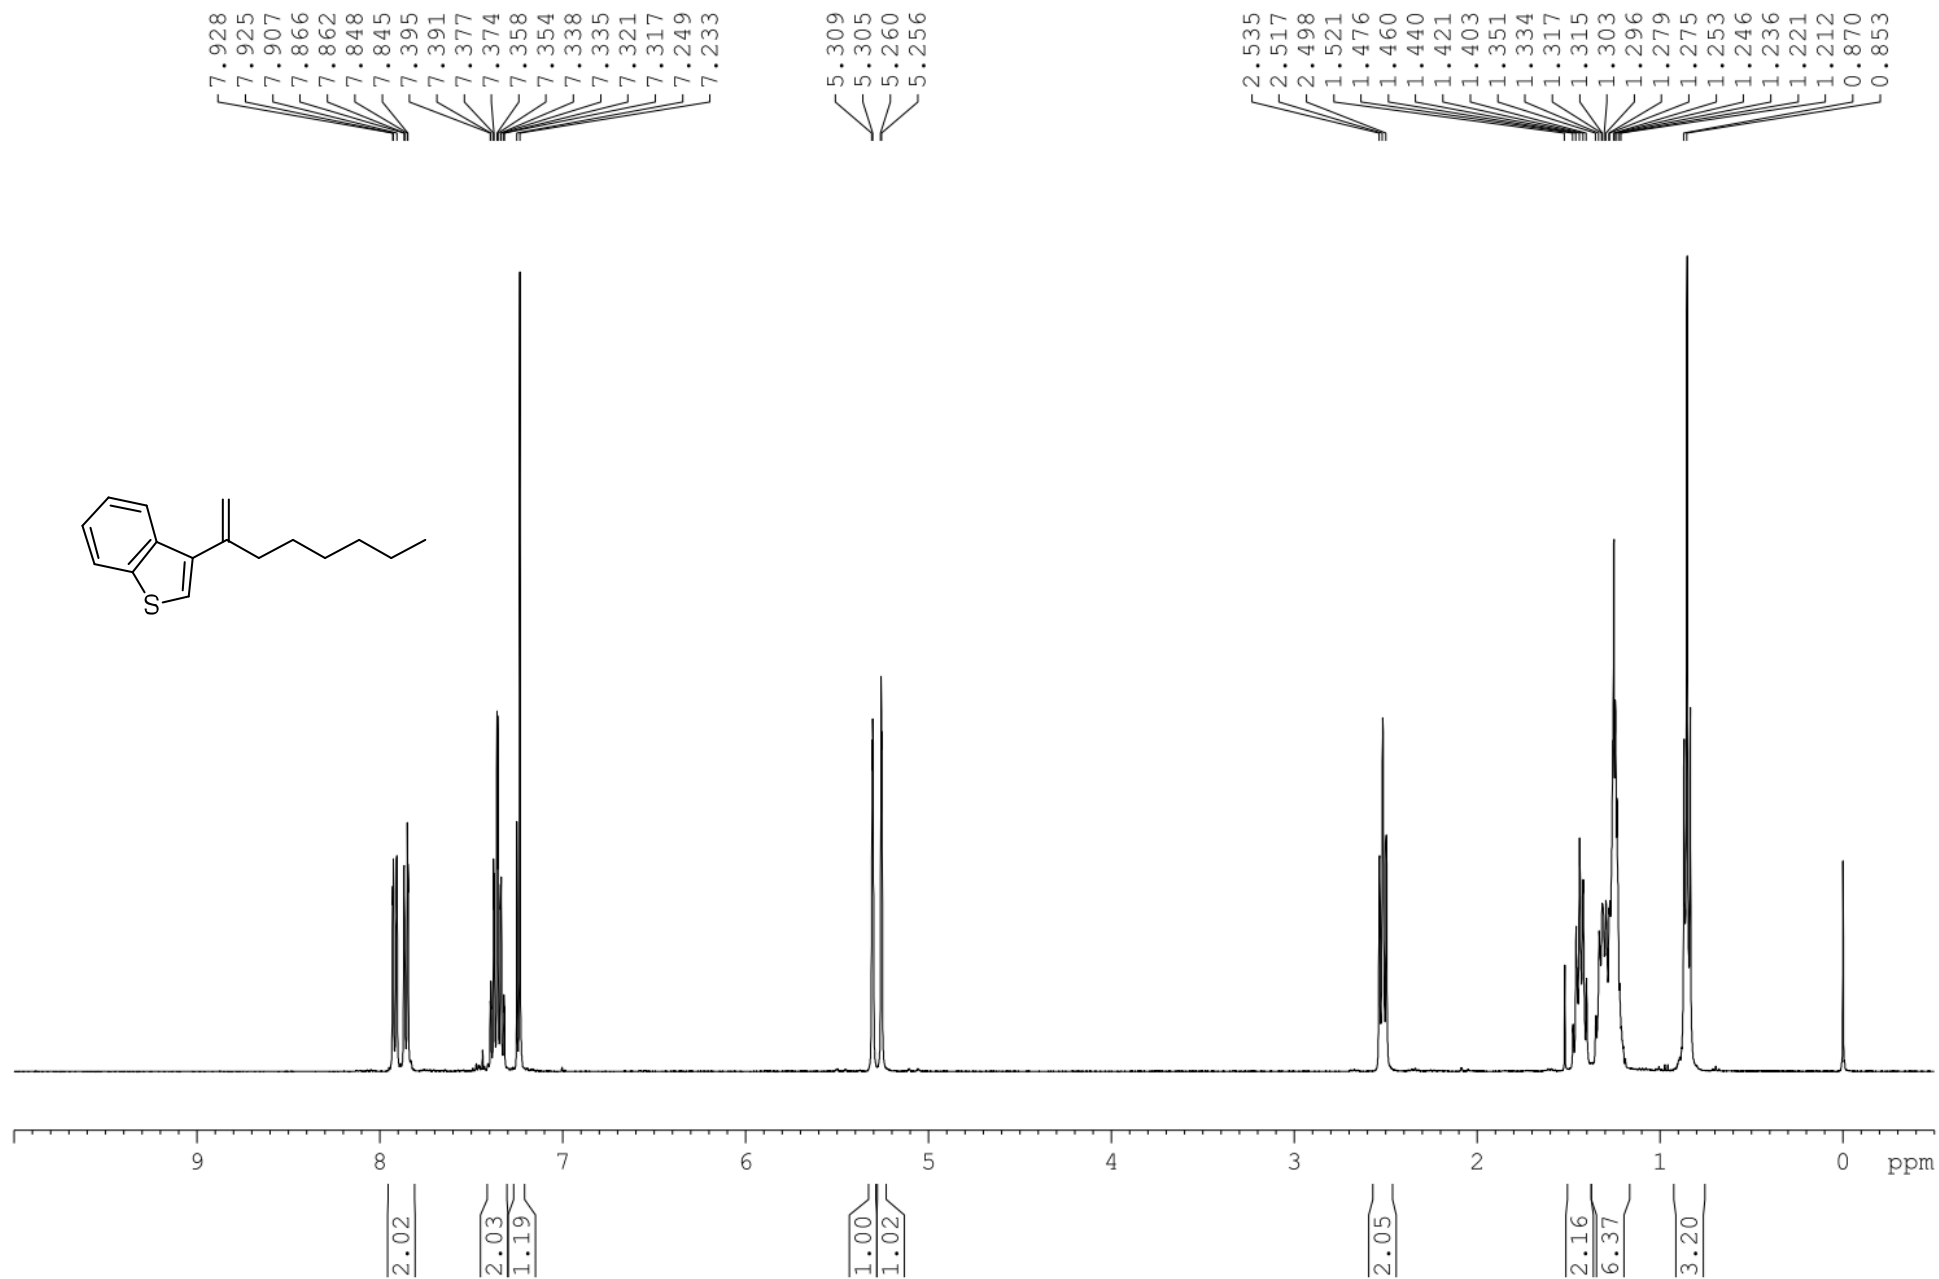

ln6117-5 C CDC13 BBFO1 2013-3-7

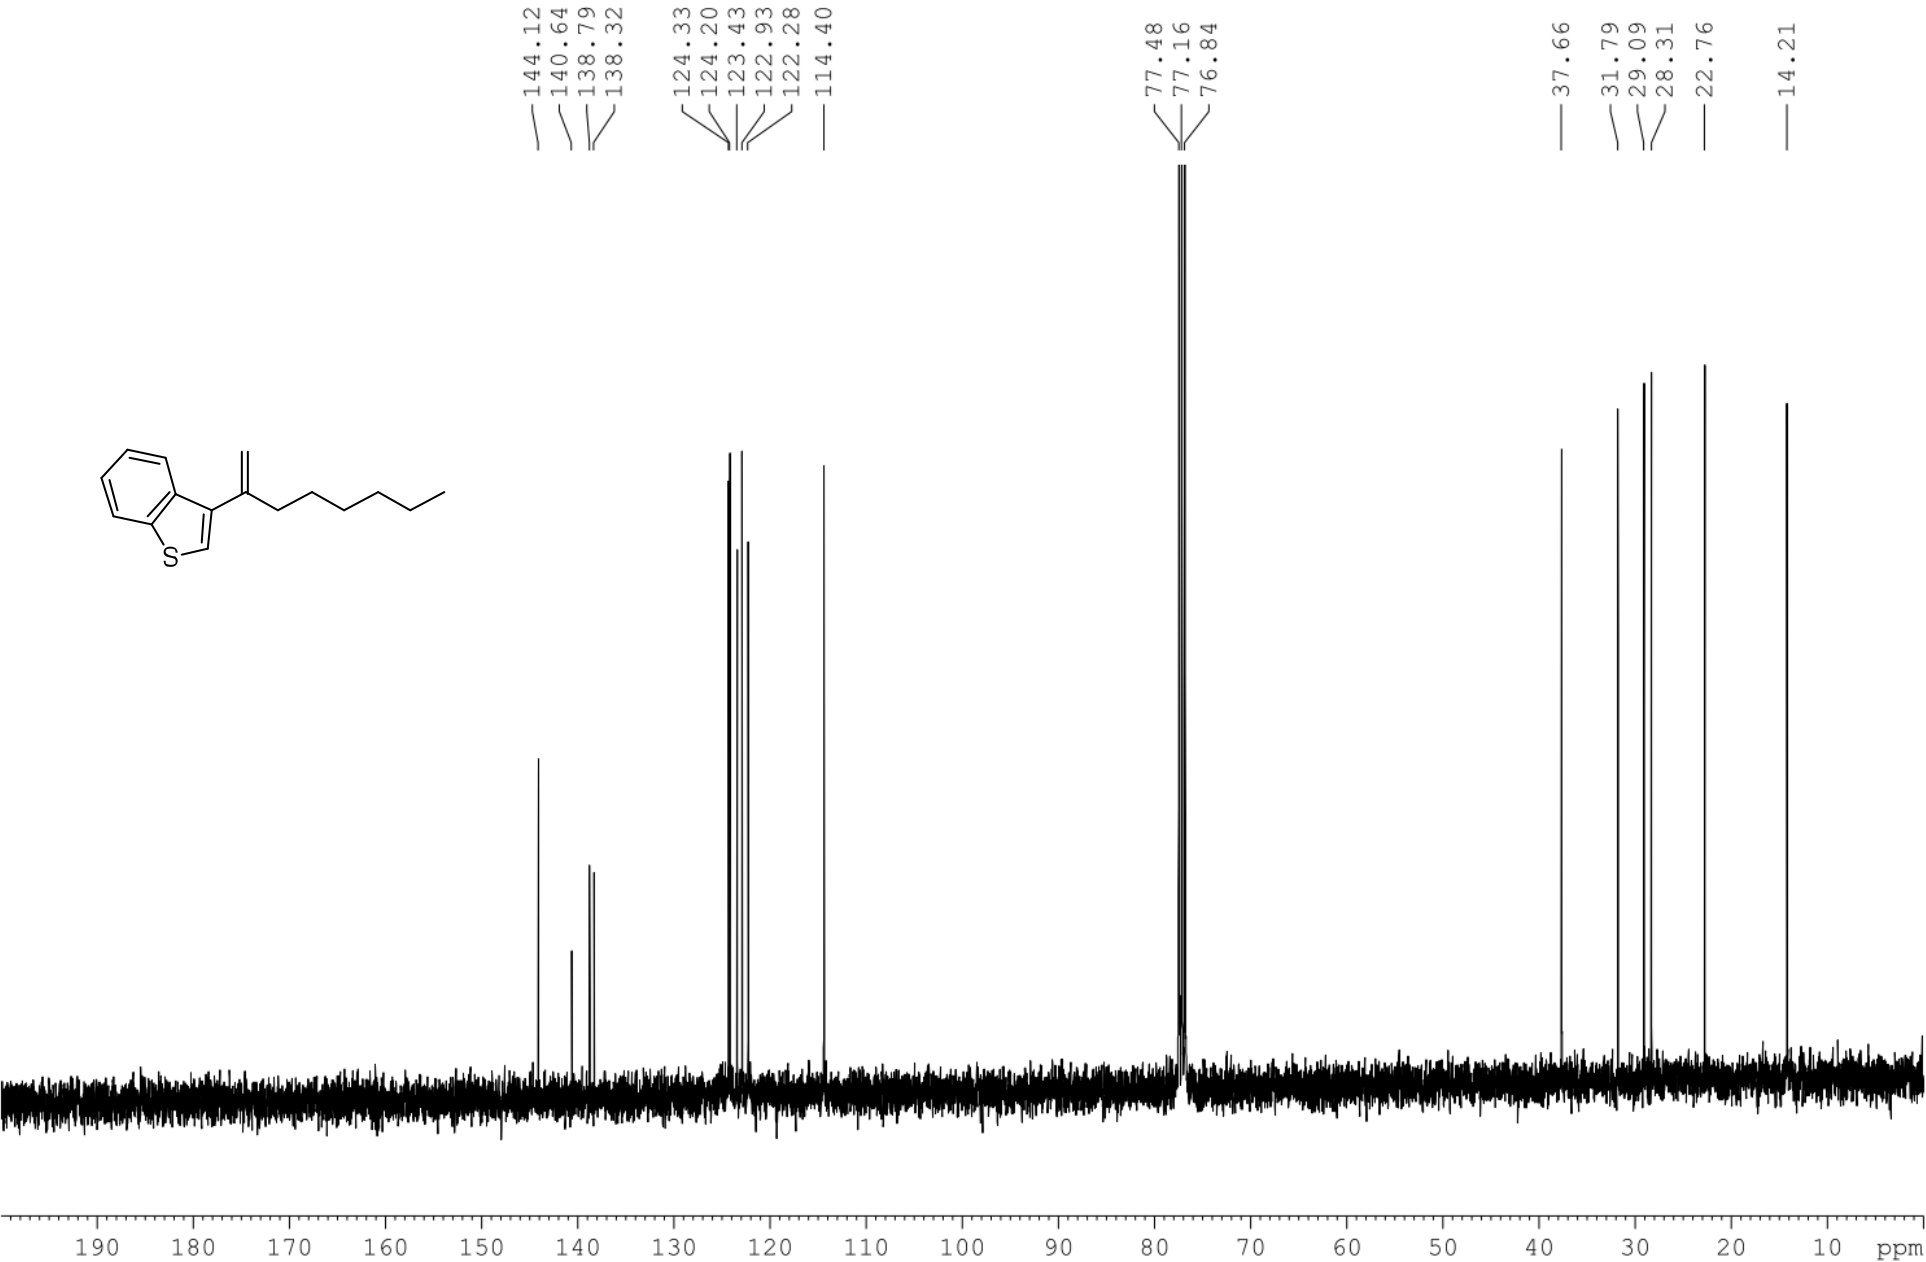

1n7050 H CDC13 AV400 3013-05-13

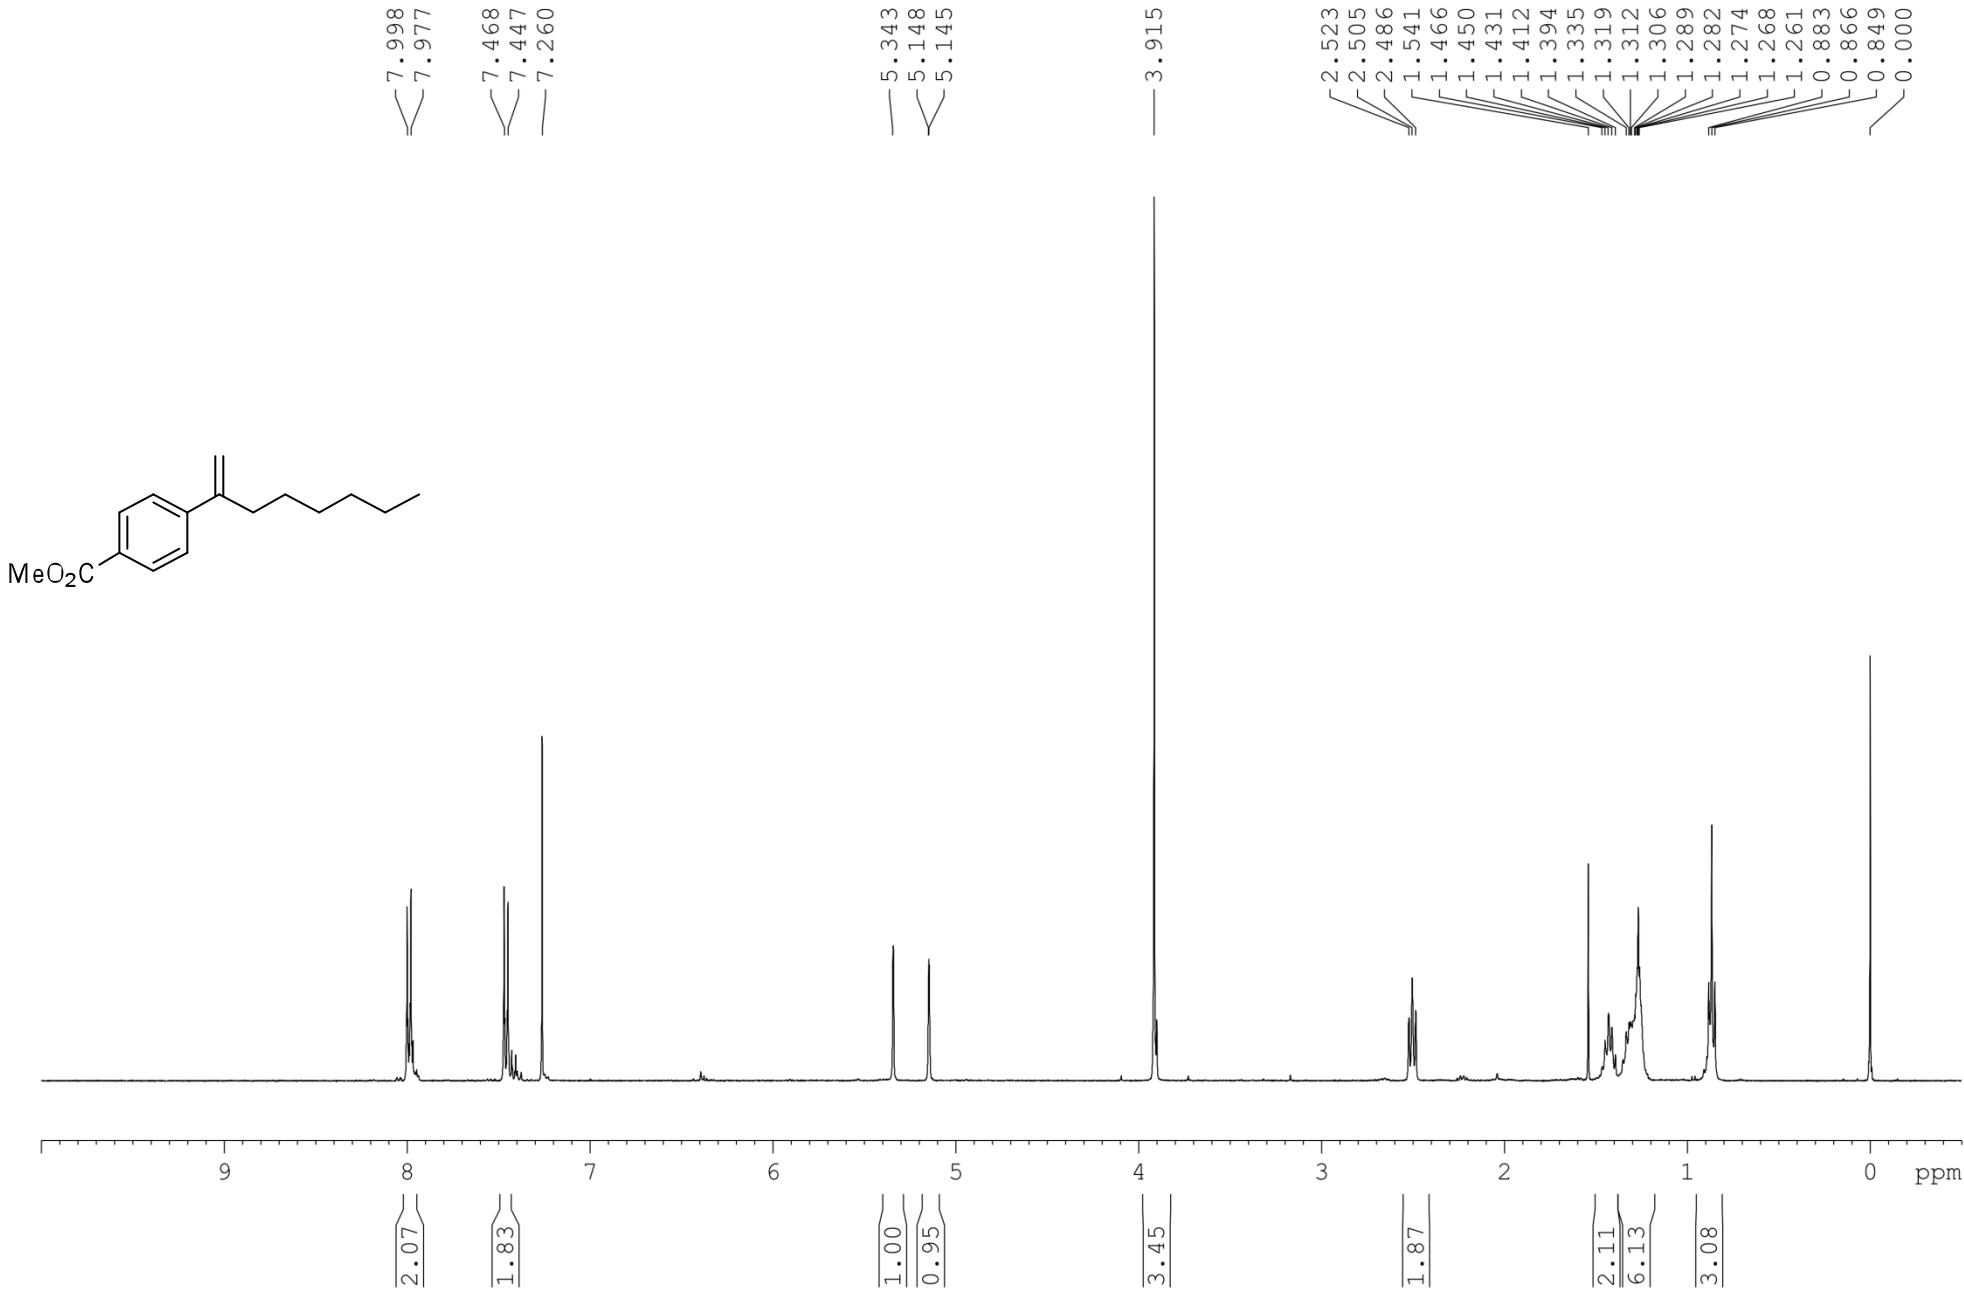



1n7045 H CDC13 AV400 3013-05-17

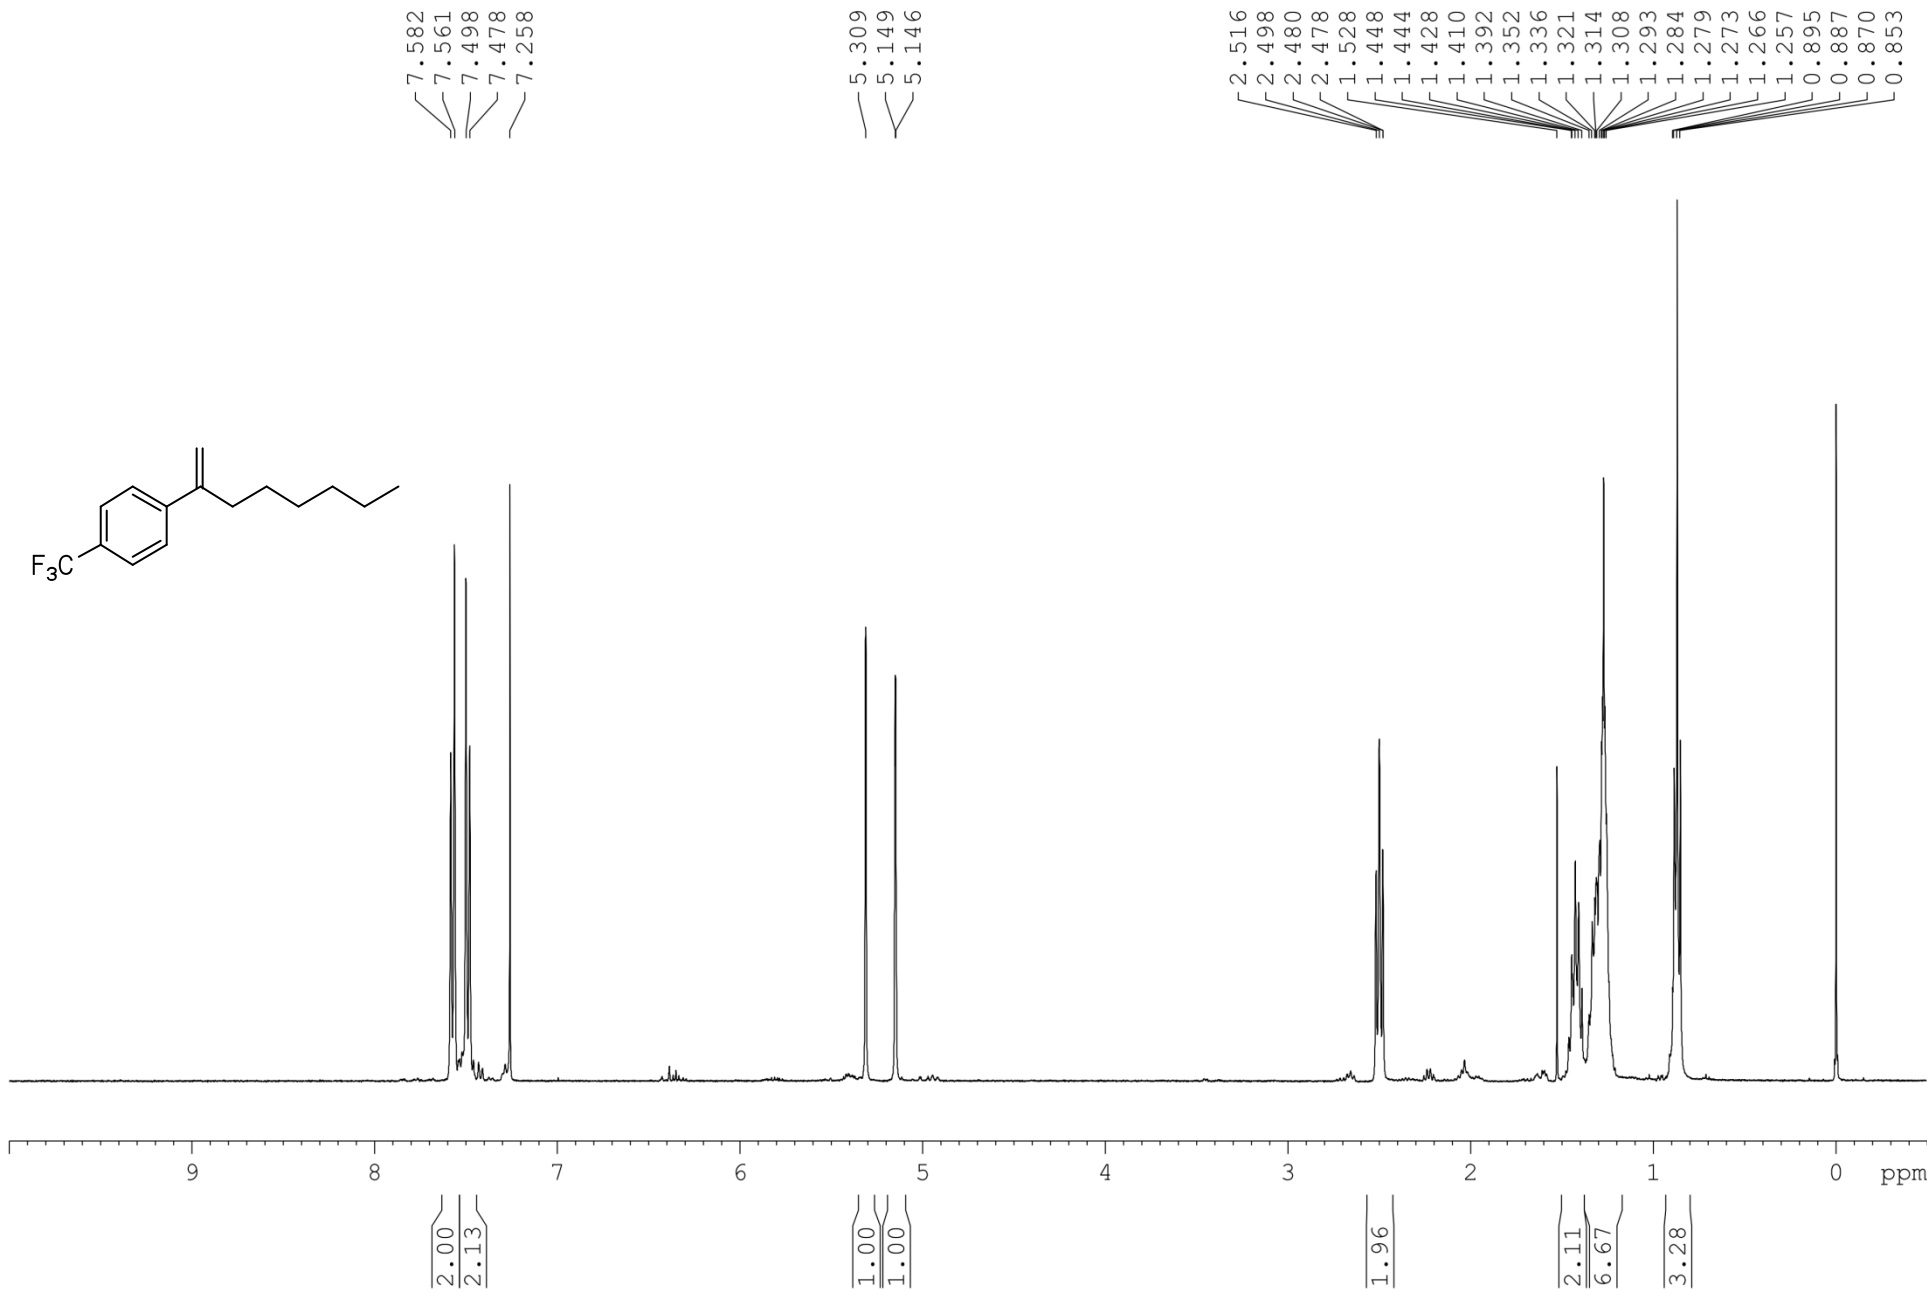

ln7044 H CDC13 BBFO1 2013-05-08

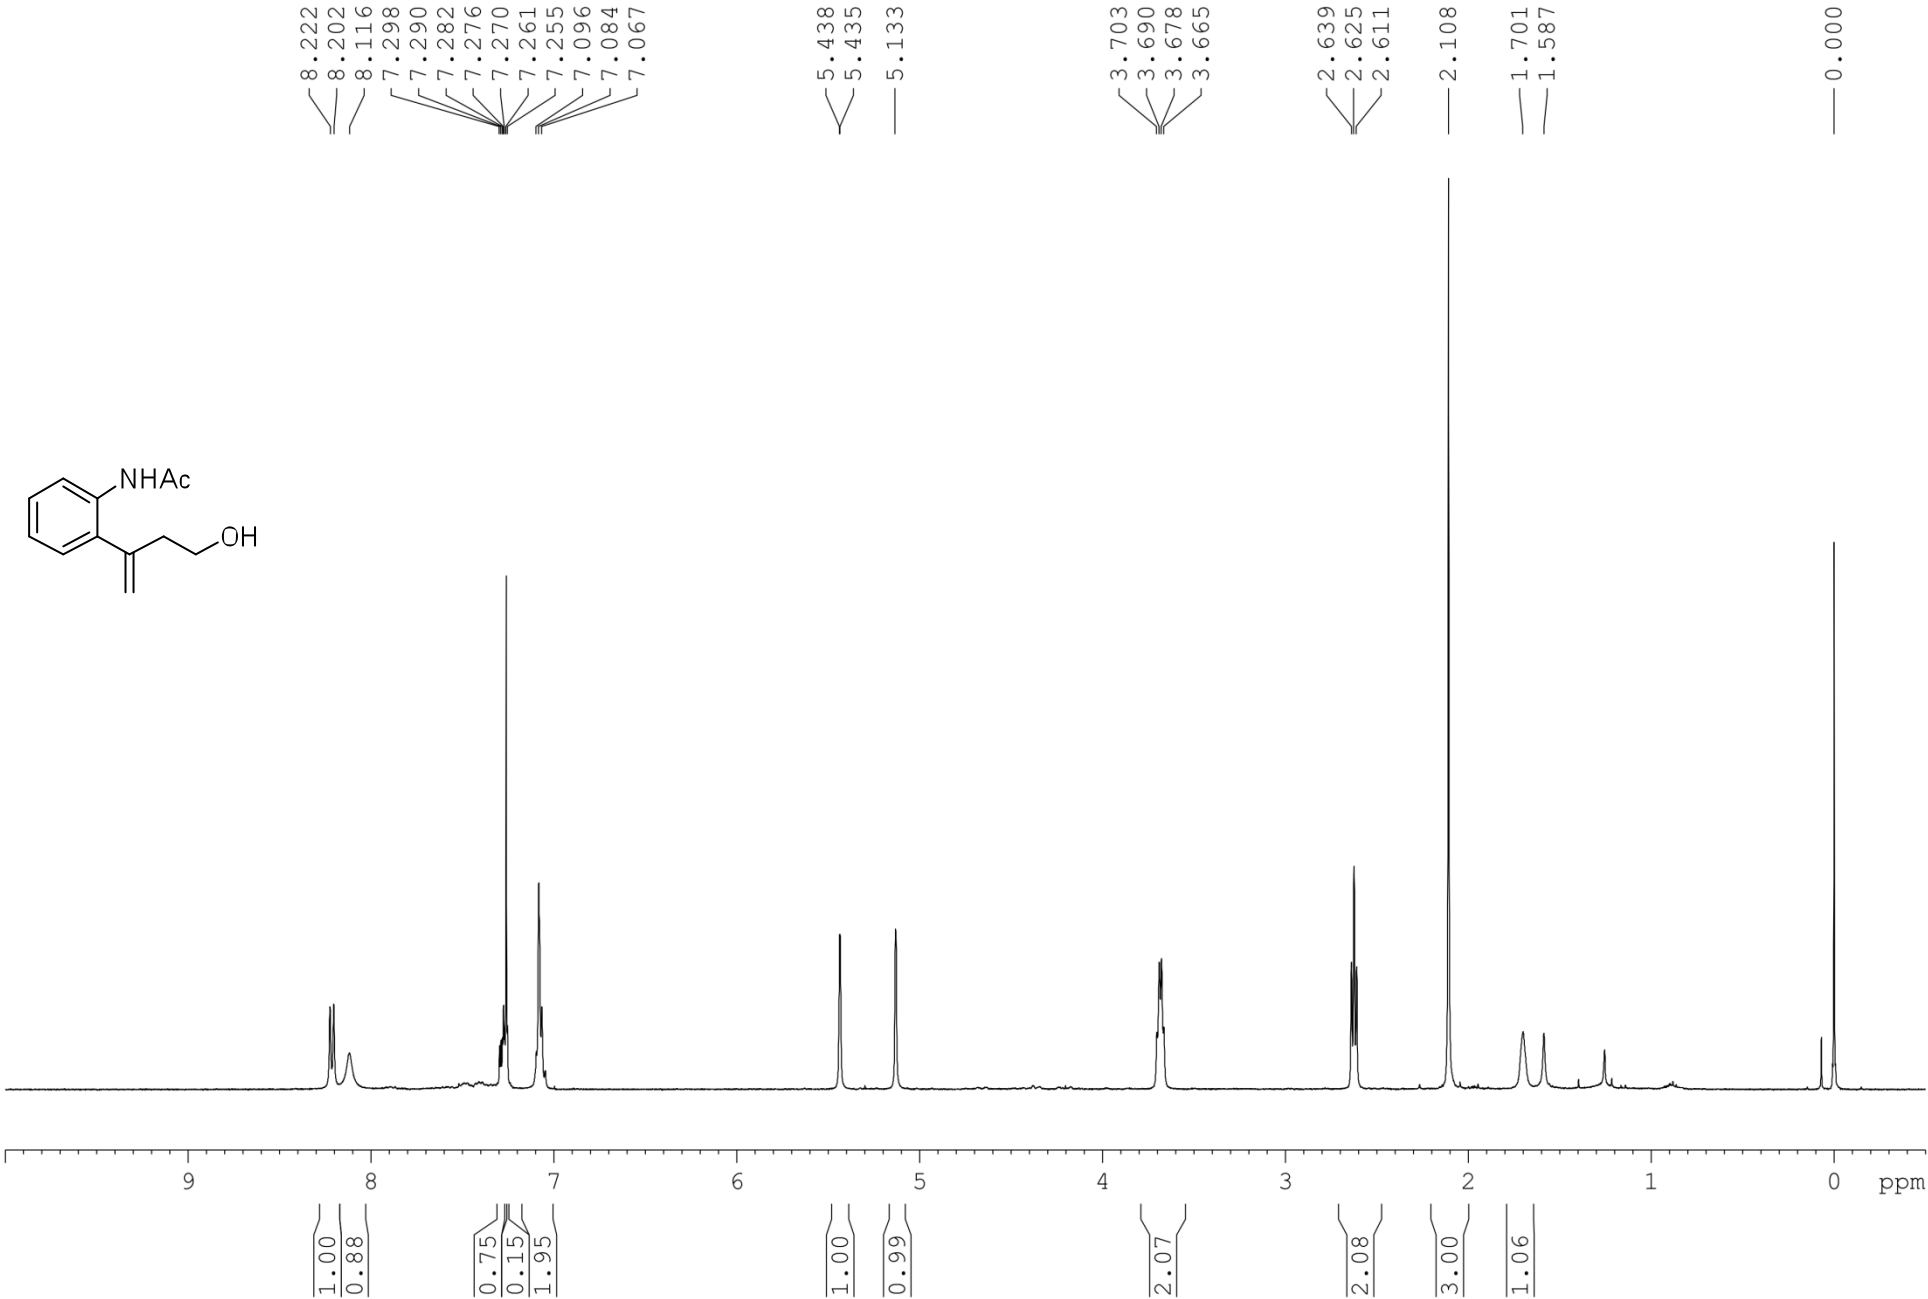

ln6122-1 H CDCl3 BBFO1 2013-3-4

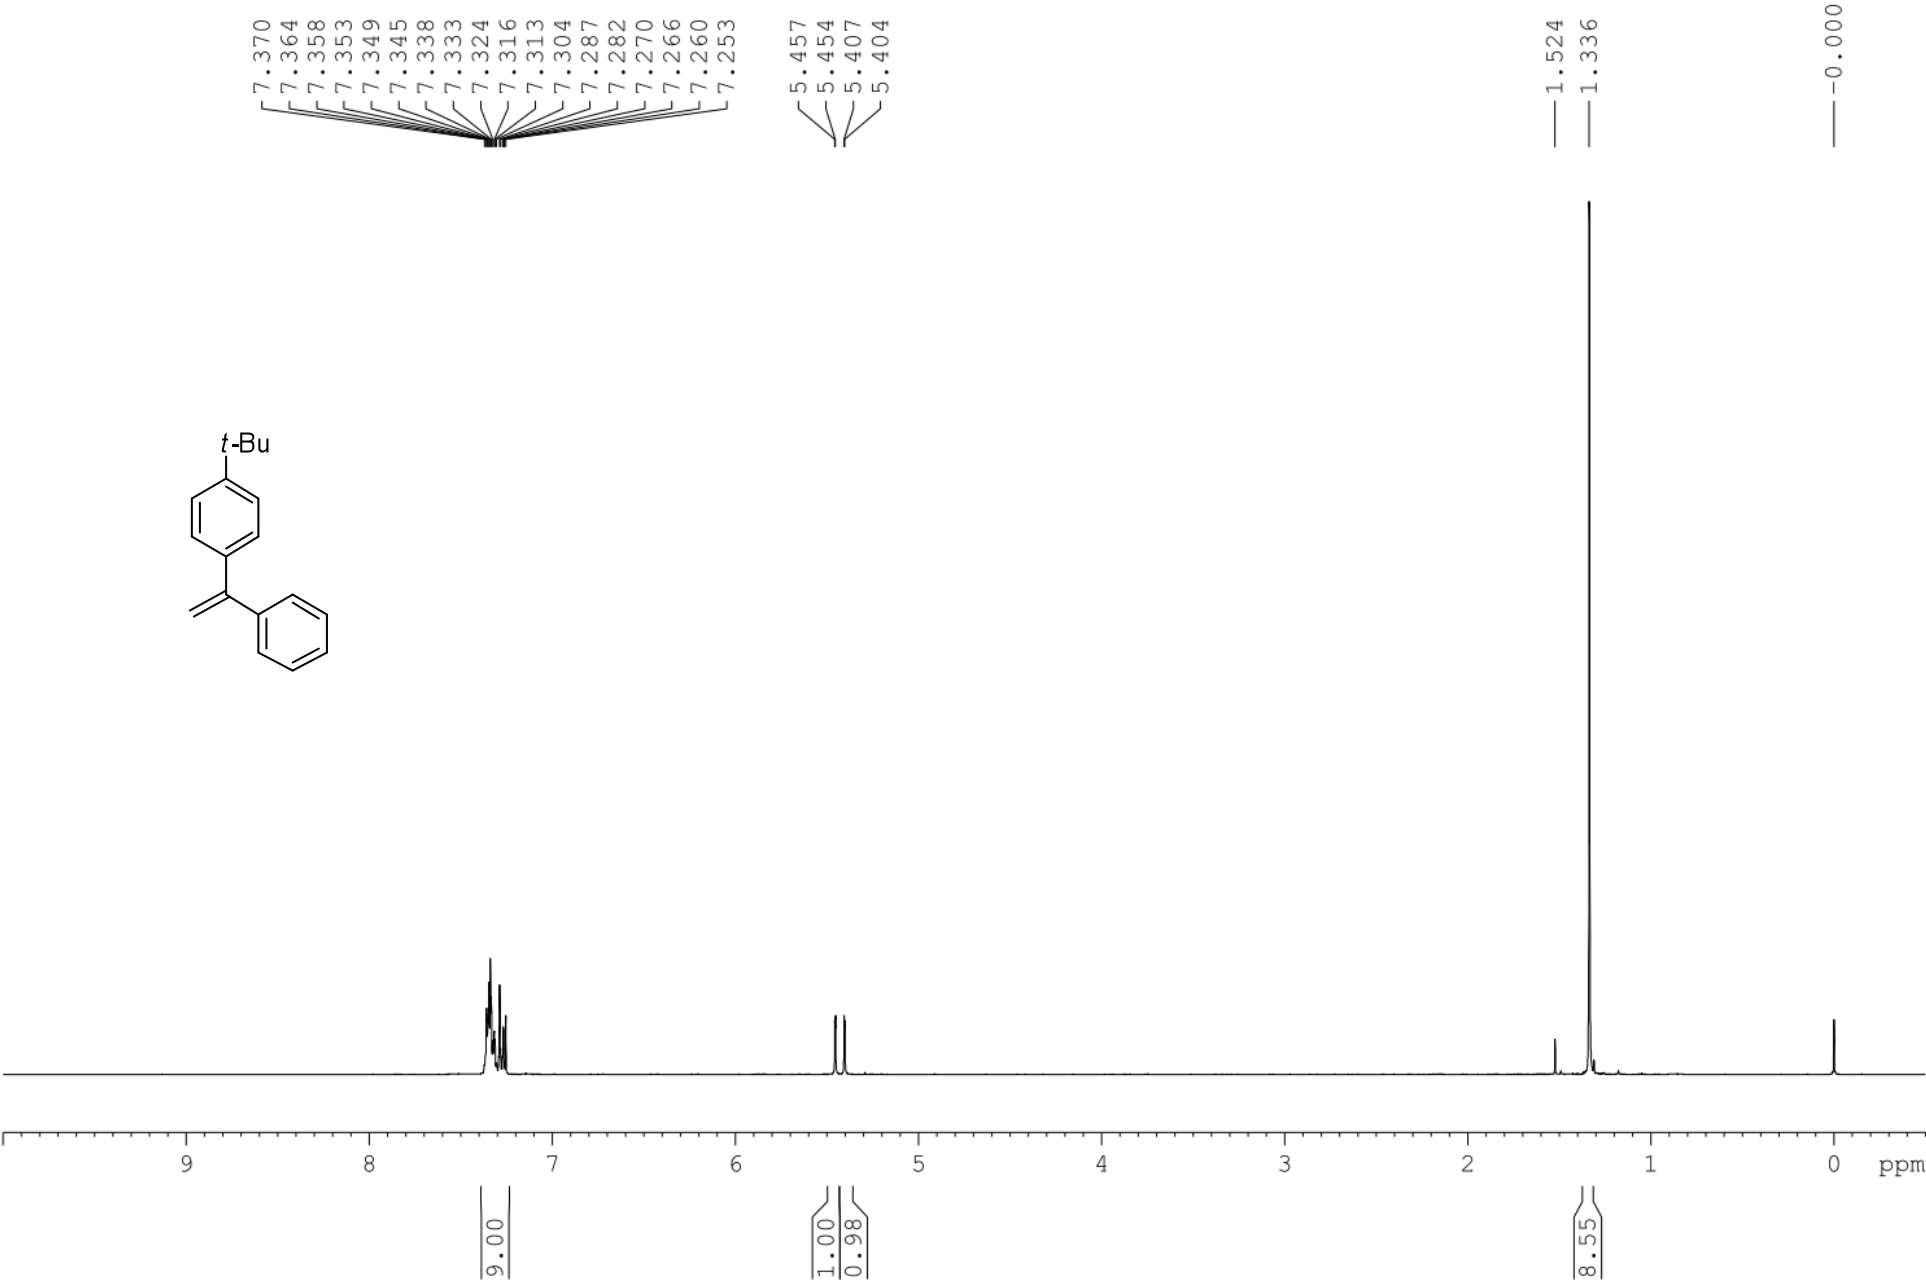

ln6122-2 H CDC13 BBF01 2013-3-7

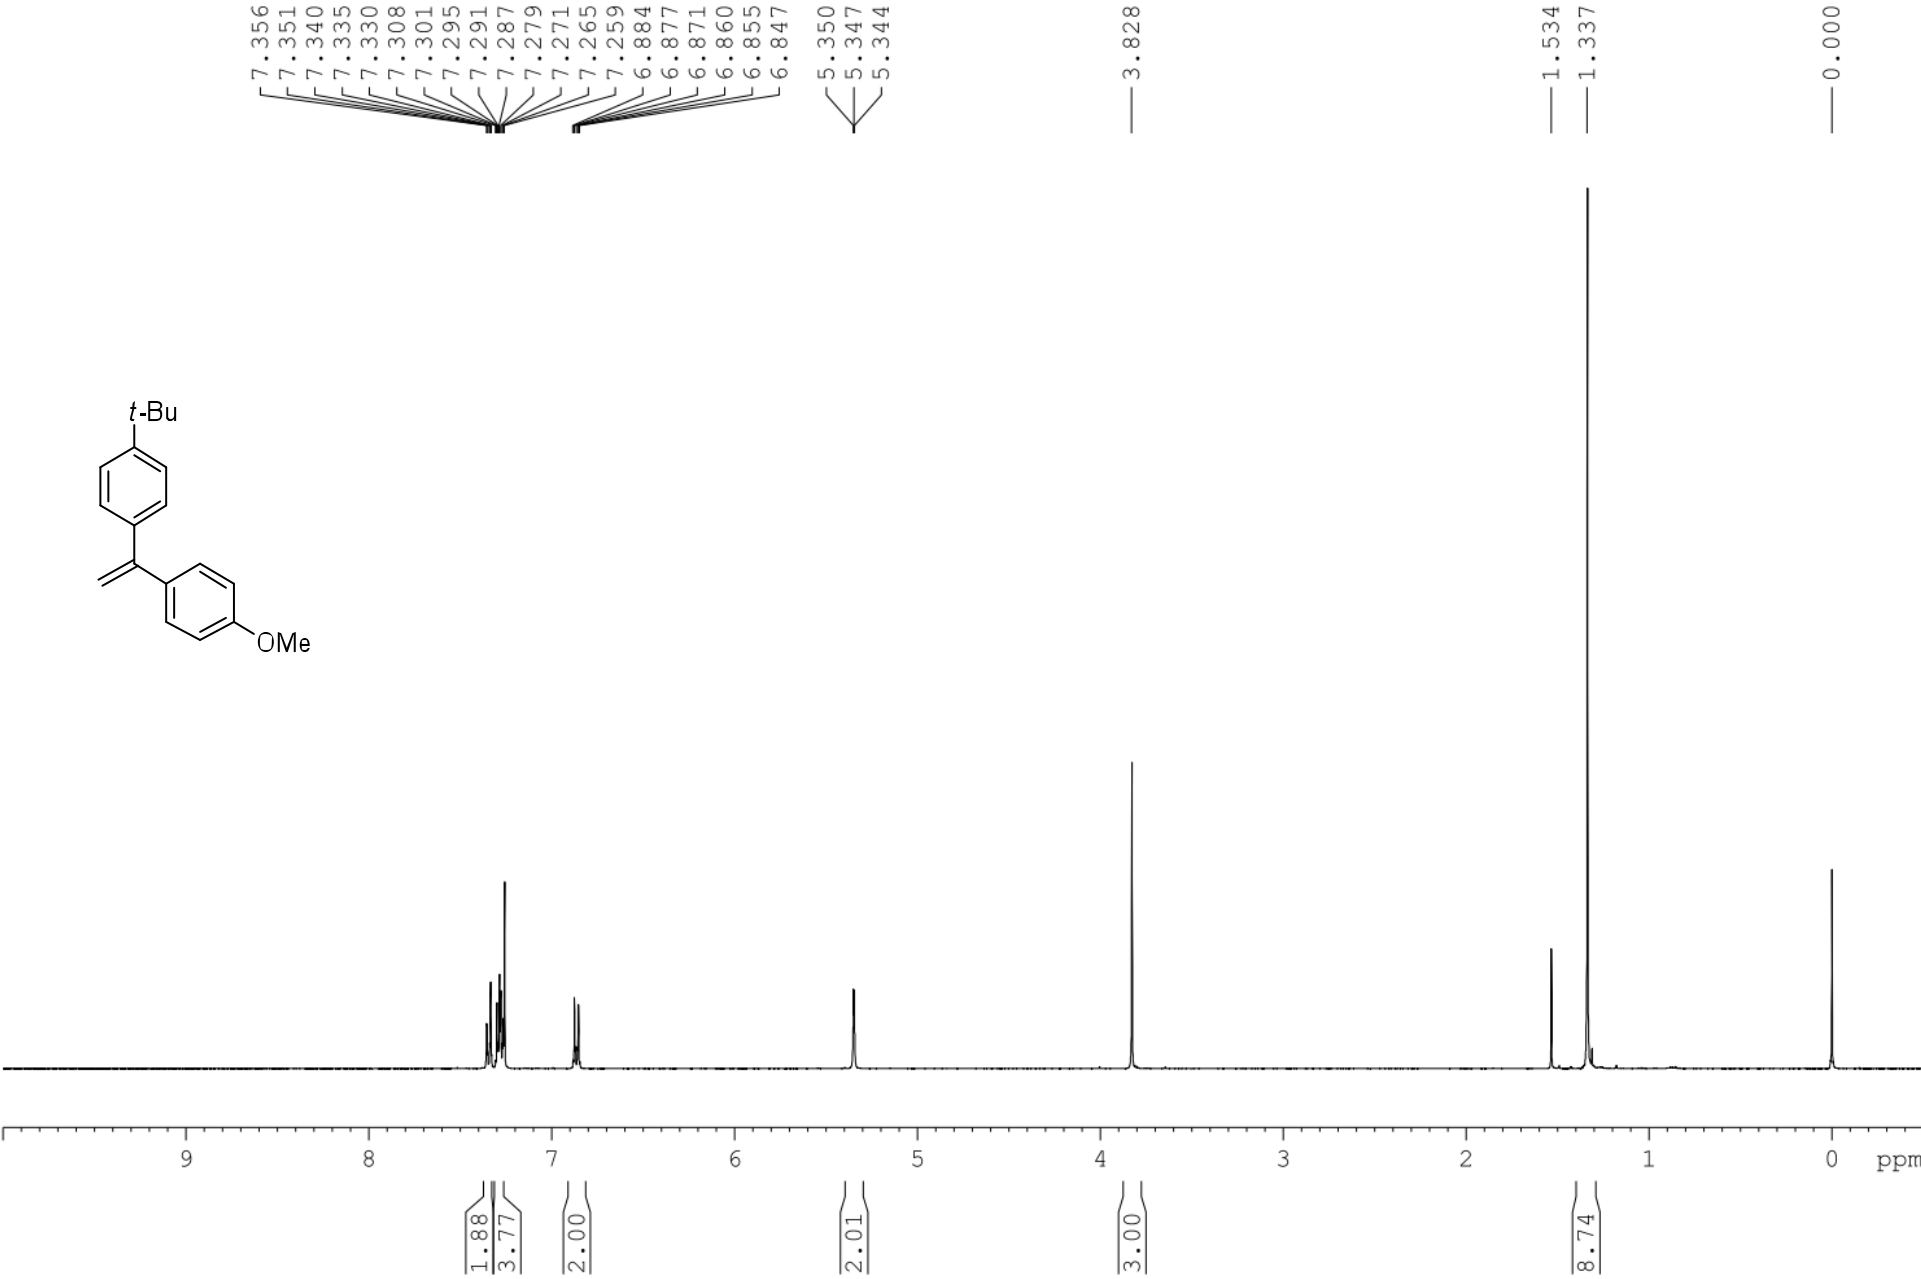

ln6127-1 H CDC13 BBFO1 2013-3-27

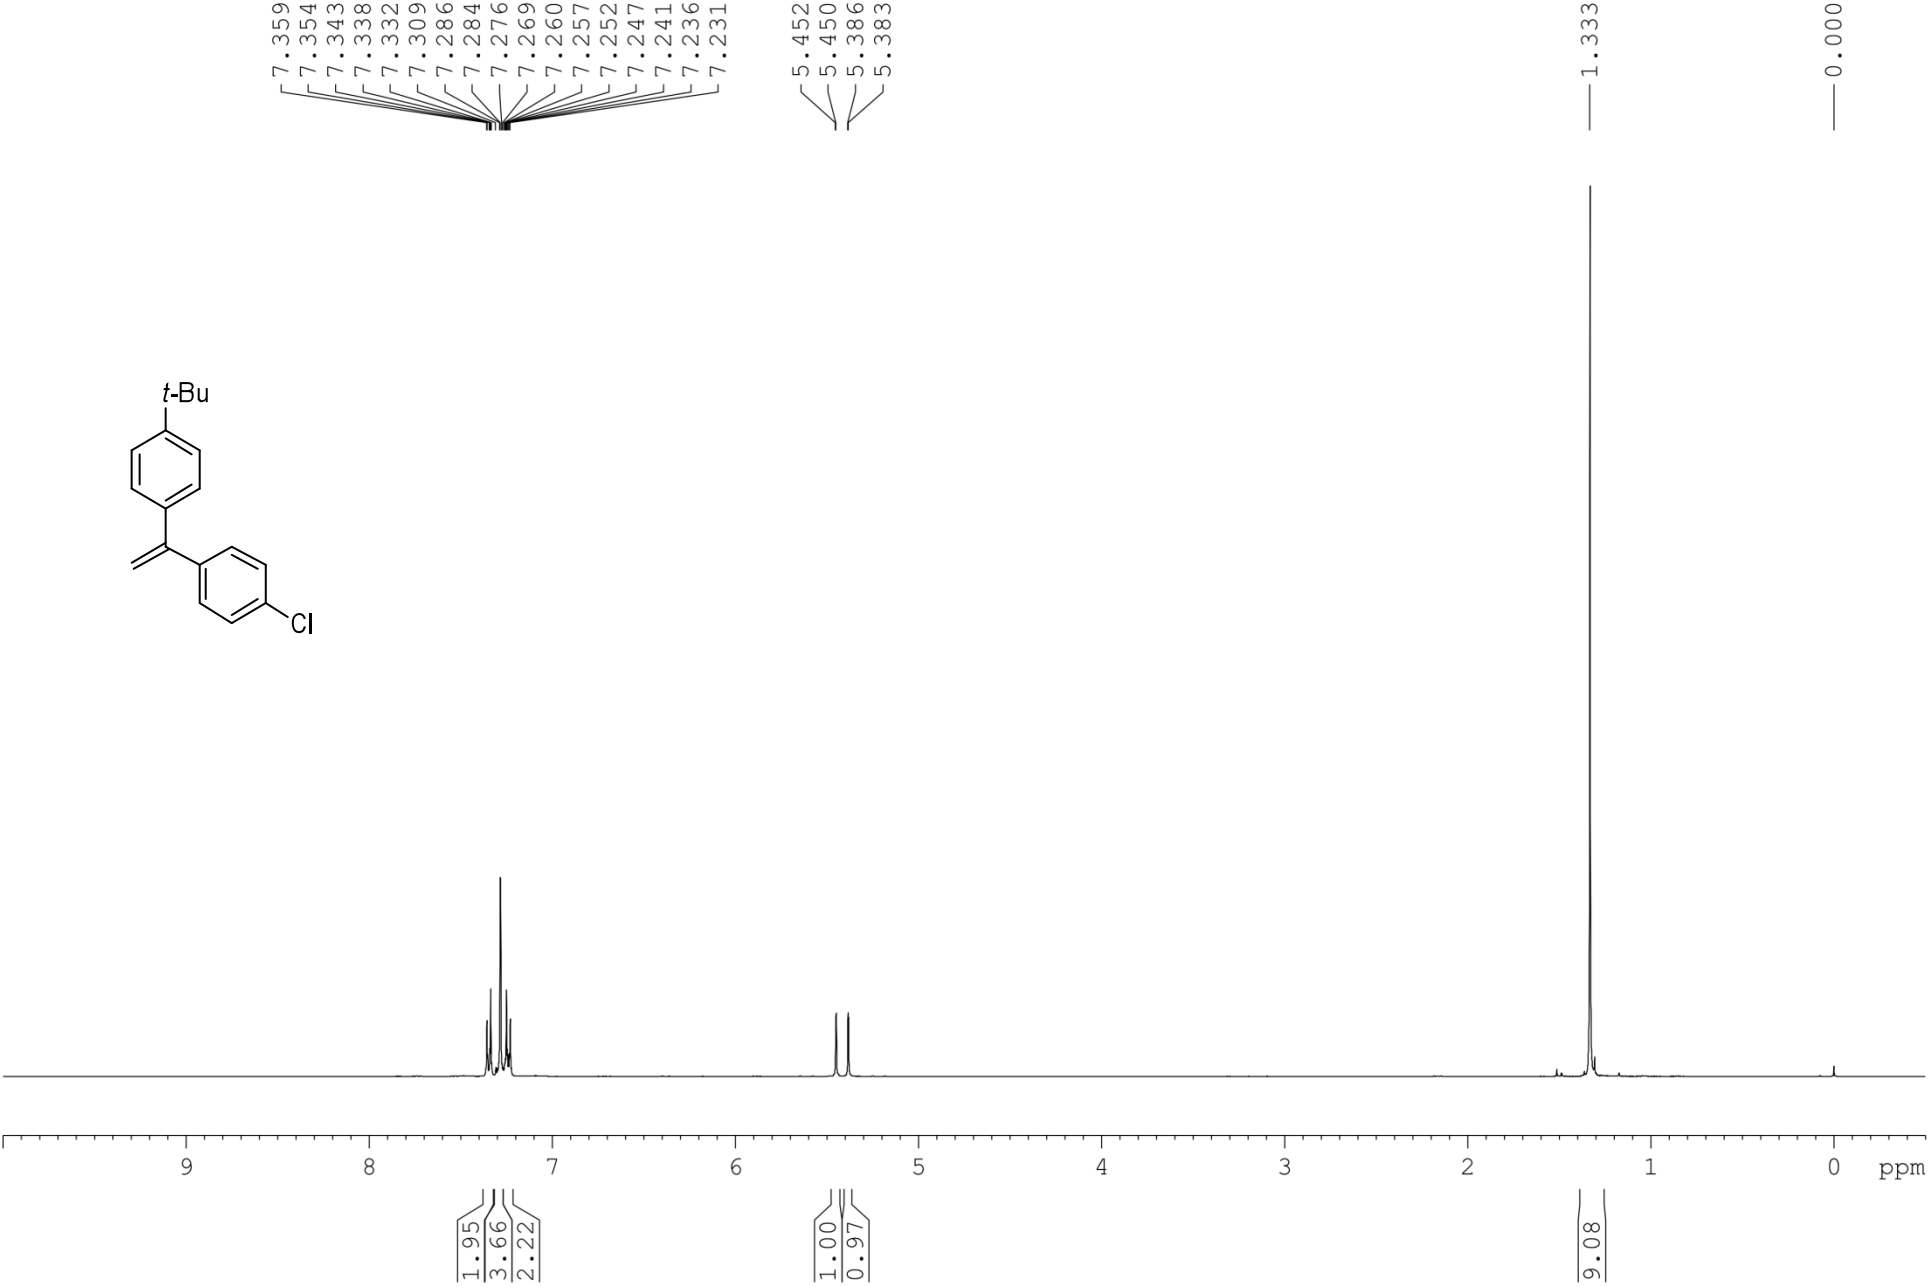

ln6127-1 C CDCl<sub>3</sub> BBFO1 2013-3-27

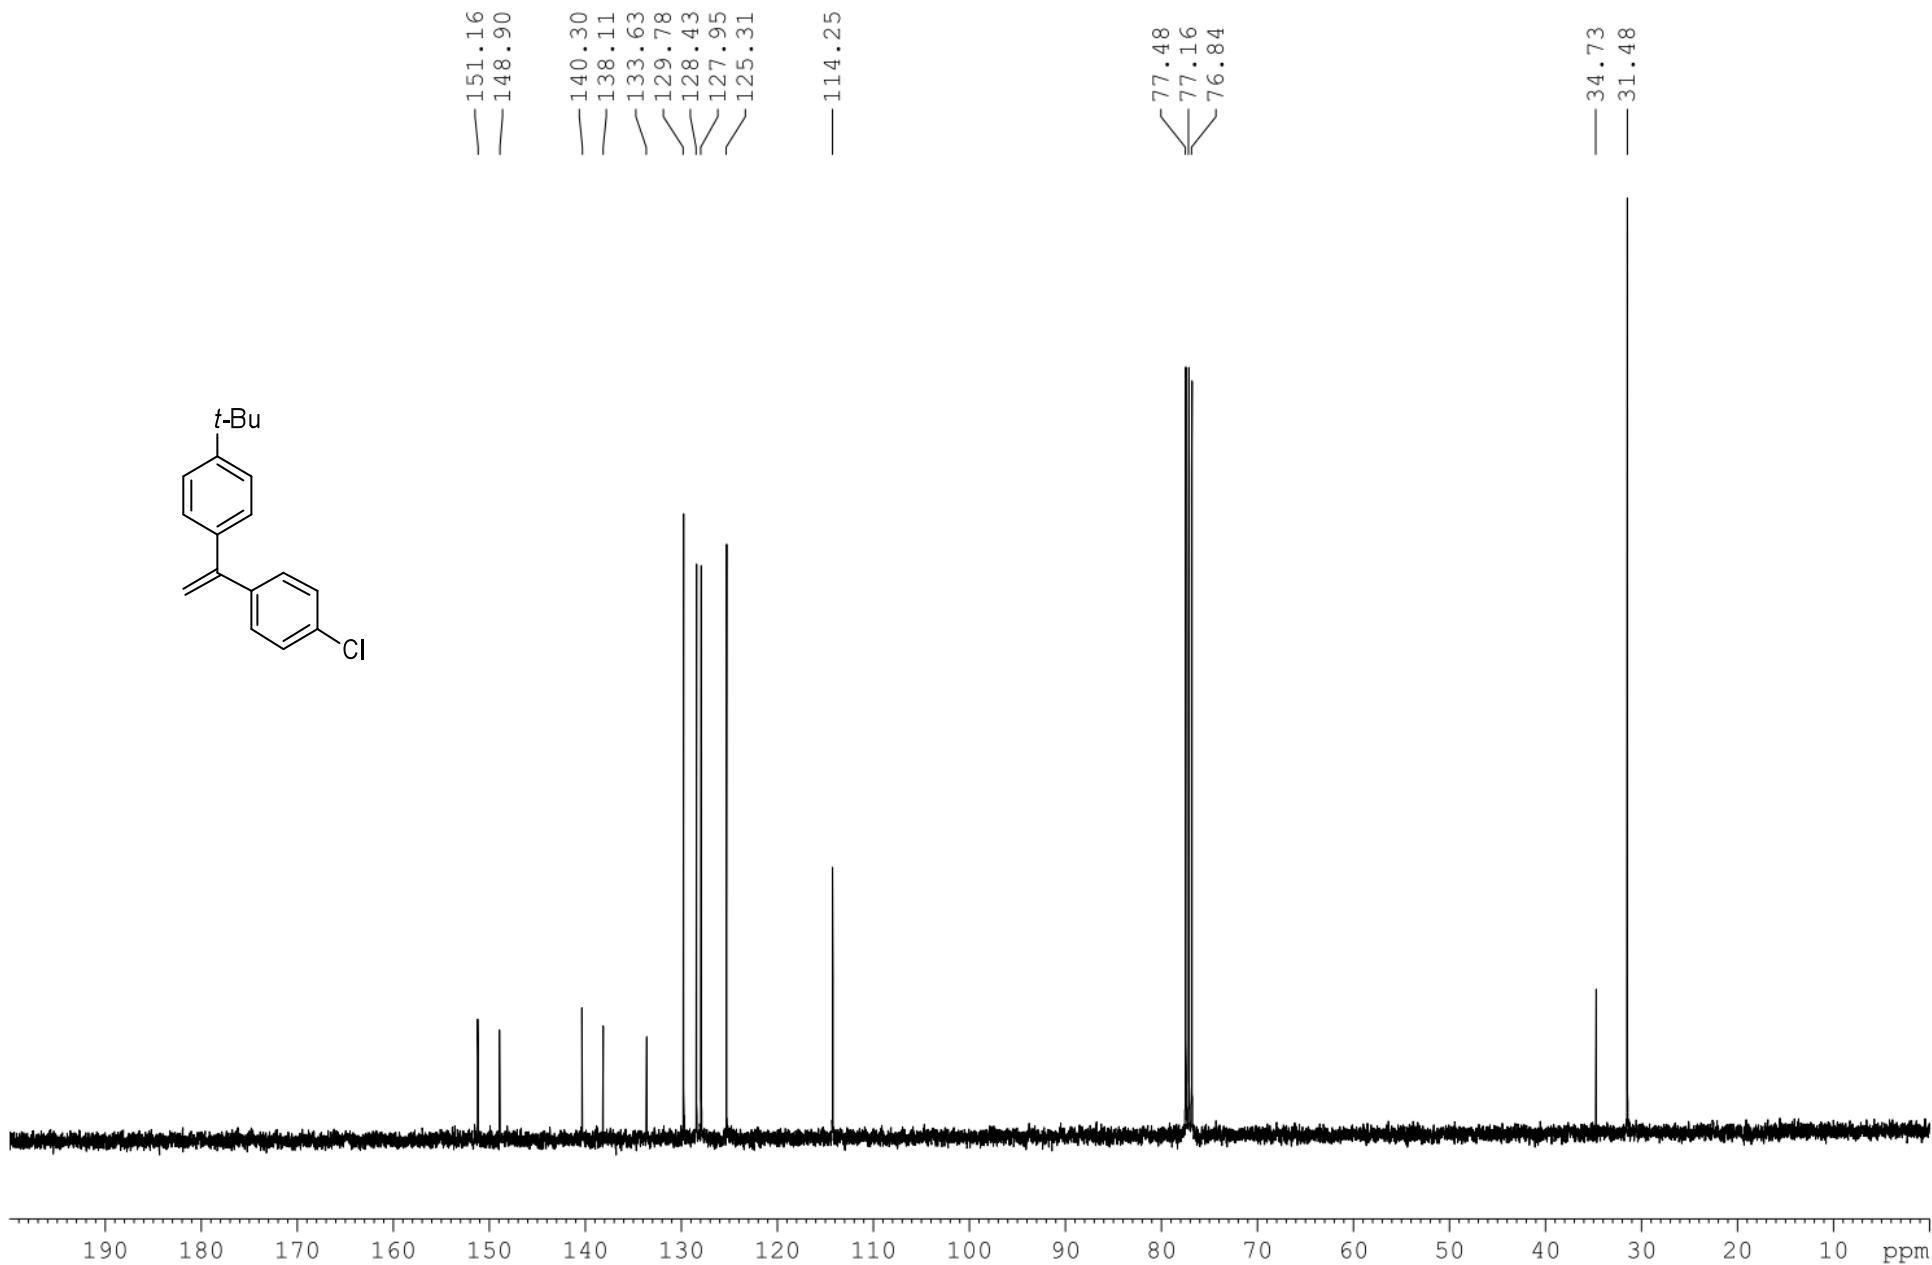

Supplement: c3cc45911j_2.pdf [file c3cc45911j_2.pdf]
